# Joint estimation of contamination, error and demography for nuclear DNA from ancient humans

Fernando Racimo<sup>a,1</sup>, Gabriel Renaud<sup>b,1</sup>, Montgomery Slatkin<sup>a</sup>

<sup>a</sup>*Department of Integrative Biology, University of California, Berkeley, CA, USA*

<sup>b</sup>*Department of Evolutionary Genetics, Max Planck Institute for Evolutionary Anthropology, Leipzig, Germany*

---

## Abstract

When sequencing an ancient DNA sample from a hominin fossil, DNA from present-day humans involved in excavation and extraction will be sequenced along with the endogenous material. This type of contamination is problematic for downstream analyses as it will introduce a bias towards the population of the contaminating individual(s). Quantifying the extent of contamination is a crucial step as it allows researchers to account for possible biases that may arise in downstream genetic analyses. Here, we present an MCMC algorithm to co-estimate the contamination rate, sequencing error rate and demographic parameters - including drift times and admixture rates - for an ancient nuclear genome obtained from human remains, when the putative contaminating DNA comes from present-day humans. We assume we have a large panel representing the putative contaminant population (e.g. European, East Asian or African). The method is implemented in a C++ program called 'Demographic Inference with Contamination and Error' (DICE). We applied it to simulations and genome data from ancient Neanderthals and modern humans. With reasonable levels of genome sequence coverage ( $> 3X$ ), we find we can recover accurate estimates of all these parameters, even when the contamination rate is as high as 50%.

**Keywords:** Ancient DNA, Contamination, MCMC, Human evolution, Demography

---



---

*Email address:* [fernandoracimo@gmail.com](mailto:fernandoracimo@gmail.com) (Fernando Racimo)

<sup>1</sup>These authors contributed equally to this work.

# 1 1. Author Summary

2 When extracting and sequencing ancient DNA from human remains, a  
3 recurrent problem is the presence of DNA from the paleontologists, archae-  
4 ologists or geneticists that may have handled the fossil. If a DNA library is  
5 highly contaminated, this will introduce biases in downstream analyses, so it  
6 is important to determine the amount of extraneous DNA. Different meth-  
7 ods exist for this purpose, but few are applicable to the nuclear genome, and  
8 none of them can extract reliable genomic information from highly contami-  
9 nated samples. Thus, samples with high rates of contamination are usually  
10 discarded. Here, we present a method to jointly estimate contamination and  
11 error rates, along with demographic parameters, like drift times and admix-  
12 ture rates. Our method can serve to uncover important details about the  
13 evolutionary history of archaic and early modern humans from ancient DNA  
14 samples, even if those samples are highly contaminated.

# 15 2. Introduction

16 When sequencing a human genome using ancient DNA (aDNA) recovered  
17 from fossils, a common practice is to assess the amount of present-day human  
18 contamination in a sequencing library [1, 2, 3, 4, 5, 6]. Several methods exist  
19 to obtain a contamination estimate. First, one can look at 'diagnostic posi-  
20 tions' in the mitochondrial genome at which a particular archaic population  
21 may be known to differ from all present-day humans. Then, one counts how  
22 many aDNA fragments support the present-day human base at those posi-  
23 tions. This is the most popular technique and has been routinely deployed in  
24 the sequencing of Neanderthal genomes [7, 1]. However, contamination levels  
25 of the mitochondrial genome may sometimes differ drastically from those of  
26 the nuclear genome [8, 9].

27 A second technique involves assessing whether the sample was male or  
28 female using the number of fragments that map to the X and the Y chromo-  
29 somes. After determining the biological sex, the proportion of reads that are  
30 non-concordant with the sex of the archaic individual are used to estimate  
31 contamination from individuals of the opposite sex (e.g. Y-chr reads in an  
32 archaic female genome are indicative of male contamination) [8, 1, 10, 4].  
33 Another method uses a maximum-likelihood approach to estimate contami-  
34 nation, but is only applicable to single-copy chromosomes, like the X chro-  
35 mosome in individuals known *a priori* to be male [11, 12]. Finally, one last

36 technique involves using a maximum-likelihood approach to co-estimate the  
37 amount of contamination, sequencing error and heterozygosity in the entire  
38 autosomal nuclear genome [1, 3], using an optimization algorithm such as  
39 L-BFGS-B [13].

40 Afterwards, if the aDNA library shows low levels of present-day human  
41 contamination ( $< \sim 2\%$ ), demographic analyses are performed on the se-  
42 quences while ignoring the contamination. If the library is highly contam-  
43 inated, it is usually treated as unusable and discarded. Neither of these  
44 outcomes is optimal: contaminating fragments may affect downstream anal-  
45 yses, while discarding the library as a whole may waste precious genomic  
46 data that could provide important demographic insights.

47 One way to address this problem was proposed by Skoglund et al. [14],  
48 who developed a statistical framework to separate contaminant from endoge-  
49 nous DNA fragments by using the patterns of chemical deamination charac-  
50 teristic of ancient DNA. The method produces a score which reflects the odds  
51 that a particular fragment is endogenous or not. This approach, however,  
52 may not be able to make a clean distinction between the two sources of DNA,  
53 especially for young ancient DNA samples, as chemical degradation may not  
54 have affected all fragments belonging to the ancient individual.

55 Instead of (or in addition to) attempting to separate the two type of frag-  
56 ments before performing a demographic analysis, one could incorporate the  
57 uncertainty stemming from the contaminant fragments into a probabilistic  
58 inference framework. Such an approach has already been implemented in the  
59 analysis of a haploid mtDNA archaic genome [15]. However, mtDNA rep-  
60 resents a single gene genealogy, and, so far, no equivalent method has been  
61 developed for the analysis of the nuclear genome, which contains the richest  
62 amount of population genetic information. Here, we present a method to  
63 co-estimate the contamination rate, per-base error rate and a simple demog-  
64 raphy for an autosomal nuclear genome of an ancient hominin. We assume  
65 we have a large panel representing the putative contaminant population, for  
66 example, European, Asian or African 1000 Genomes data [16]. The method  
67 uses a Bayesian framework to obtain posterior estimates of all parameters  
68 of interest, including population-size-scaled divergence times and admixture  
69 rates.

### 70 3. Methods

#### 71 3.1. Basic framework for estimation of error and contamination

72 We will first describe the probabilistic structure of our inference frame-  
73 work. We begin by defining the following parameters:

- 74 •  $r_c$ : contamination rate in the ancient DNA sample coming from the  
75 contaminant population
- 76 •  $\epsilon$ : error rate, i.e. probability of observing a derived allele when the true  
77 allele is ancestral, or vice versa.
- 78 •  $i$ : number of chromosomes that contain the derived allele at a particular  
79 site in the ancient individual ( $i = 0, 1$  or  $2$ )
- 80 •  $d_j$ : number of derived fragments observed at site  $j$
- 81 •  $\mathbf{d}$ : vector of  $d_j$  counts for all sites  $j = \{1, \dots, N\}$  in a genome
- 82 •  $a_j$ : number of ancestral fragments observed at site  $j$
- 83 •  $\mathbf{a}$ : vector of  $a_j$  counts for all sites  $j = \{1, \dots, N\}$  in a genome
- 84 •  $w_j$ : known frequency of a derived allele in a candidate contaminant  
85 panel at site  $j$  ( $0 \leq w_j \leq 1$ )
- 86 •  $\mathbf{w}$ : vector of  $w_j$  frequencies for all sites  $j = \{1, \dots, N\}$  in a genome
- 87 •  $K$ : number of informative SNPs used as input
- 88 •  $\theta$ : population-scaled mutation rate.  $\theta = 4N_e\mu$ , where  $N_e$  is the effective  
89 population size and  $\mu$  is the per-generation mutation rate.

90 We are interested in computing the probability of the data given the  
91 contamination rate, the error rate, the derived allele frequencies from the  
92 putative contaminant population ( $\mathbf{w}$ ) and a set of demographic parameters  
93 ( $\mathbf{\Omega}$ ). We will use only sites that are segregating in the contaminant panel  
94 and we will assume that we observe only ancestral or derived alleles at every  
95 site (i.e. we ignore triallelic sites). In some of the analyses below, we will  
96 also assume that we have additional data ( $\mathbf{O}$ ) from present-day populations  
97 that may be related to the population to which the sample belongs. The

98 nature of the data in  $\mathbf{O}$  will be explained below, and will vary in each of the  
 99 different cases we describe. The parameters contained in  $\Omega$  may simply be  
 100 the population-scaled times separating the contaminant population and the  
 101 sample from their common ancestral population. However,  $\Omega$  may include  
 102 additional parameters, such as the admixture rate - if any - between the  
 103 contaminant and the sample population. The number of parameters we can  
 104 include in  $\Omega$  will depend on the nature of the data in  $\mathbf{O}$ .

105 For all models we will describe, the probability of the data can be defined  
 106 as:

$$P[\mathbf{a}, \mathbf{d} \mid r_C, \epsilon, \mathbf{w}, \Omega, \mathbf{O}] = \prod_{j=1}^K P[a_j, d_j \mid r_C, \epsilon, w_j, \Omega, \mathbf{O}] \quad (1)$$

107 where

$$P[a_j, d_j \mid r_C, \epsilon, w_j, \Omega, \mathbf{O}] = \sum_{i=0}^2 P[a_j, d_j \mid i, r_C, \epsilon, w_j] P[i \mid \Omega, \mathbf{O}] \quad (2)$$

108 Here,  $i$  is the true (unknown) genotype of the ancient sample, and  $P[i \mid \Omega, \mathbf{O}]$   
 109 is the probability of genotype  $i$  given the demographic parameters and the  
 110 data.

111 We focus now on computation on the likelihood for one site  $j$  in the  
 112 genome. In the following, we abuse notation and drop the subscript  $j$ . Given  
 113 the true genotype of the ancient individual, the number of derived and an-  
 114 cestral fragments at a particular site follows a binomial distribution that  
 115 depends on the genotype, the error rate and the rate of contamination [1, 3]:

$$P[a, d \mid i, r_C, \epsilon, w] = \binom{a+d}{d} q_i^d (1 - q_i)^a \quad (3)$$

116 where

$$q_2 = r_C (w(1 - \epsilon) + (1 - w)\epsilon) + (1 - r_C)(1 - \epsilon) \quad (4)$$

$$q_1 = r_C (w(1 - \epsilon) + (1 - w)\epsilon) + (1 - r_C) ((1 - \epsilon)/2 + \epsilon/2) \quad (5)$$

$$q_0 = r_C (w(1 - \epsilon) + (1 - w)\epsilon) + (1 - r_C)\epsilon \quad (6)$$

117 In the sections below, we will turn to the more complicated part of the  
118 model, which is obtaining the probability  $P[i|\mathbf{\Omega}, \mathbf{O}]$  for a genotype in the  
119 ancient sample, given particular demographic parameters and additional data  
120 available. We will do this in different ways, depending on the kind of data  
121 we have at hand.

### 122 3.2. Diffusion-based likelihood for neutral drift separating two populations

123 First, we will work with the case in which  $\mathbf{O} = \mathbf{y}$ , where  $\mathbf{y}$  is a vector of  
124 frequencies  $y_j$  from an “anchor” population that may be closely related to the  
125 population of the ancient DNA sample. An example of this scenario would  
126 be the sequencing of a Neanderthal sample that is suspected to have contam-  
127 ination from present-day humans, from which many genomes are available.

128 For all analyses below, we restrict to sites where  $0 < y_j < 1$ . Note  
129 that it is entirely possible (but not required) that  $\mathbf{y} = \mathbf{w}$ , meaning that,  
130 aside from the ancient DNA sample, the only additional data we have are  
131 the frequencies of the derived allele in the putative contaminant population,  
132 which we can use as the anchor population too. However, it is also possible to  
133 use a contaminant panel that is different from the anchor population (Figure  
134 1.A). We will assume we have sequenced a large number of individuals from  
135 a panel of the contaminant population (for example, The 1000 Genomes  
136 Project panel) and that the panel is large enough such that the sampling  
137 variance is approximately 0. In other words, the frequency we observe in the  
138 contaminant panel will be assumed to be equal to the population frequency  
139 in the entire contaminant population. In this case,  $\mathbf{\Omega} = \{\tau_C, \tau_A\}$ , where  $\tau_A$   
140 and  $\tau_C$  are defined as follows:

141  $\tau_A$ : drift time (i.e. time in generations scaled by twice the haploid effective  
142 population size) separating the population to which the ancient individual  
143 belongs from the ancestor of both populations

144  $\tau_C$ : drift time separating the anchor population from the ancestor of both  
145 populations

146 We need to calculate the conditional probabilities  $P[i|\mathbf{\Omega}, \mathbf{O}] = \mathbf{P}[\mathbf{i}|\mathbf{y}, \tau_C, \tau_A]$   
147 for all three possibilities for the genotype in the ancient individual:  $i =$   
148 0, 1 or 2. To obtain these expressions, we rely on Wright-Fisher diffusion  
149 theory (reviewed in Ewens [17]), especially focusing on the two-population  
150 site-frequency spectrum (SFS) [18]. The full derivations can be found in  
151 Appendix A, and lead to the following formulas:

$$P[i = 0 \mid y, \tau_C, \tau_A] = 1 - y * e^{-\tau_C} - \frac{1}{2} * y * e^{-\tau_A - \tau_C} + y \left( y - \frac{1}{2} \right) e^{-\tau_A - 3\tau_C} \quad (7)$$

$$P[i = 1 \mid y, \tau_C, \tau_A] = y * e^{-\tau_A - \tau_C} + y(1 - 2y) e^{-\tau_A - 3\tau_C} \quad (8)$$

$$P[i = 2 \mid y, \tau_C, \tau_A] = y * e^{-\tau_C} - \frac{1}{2} * y * e^{-\tau_A - \tau_C} + y \left( y - \frac{1}{2} \right) e^{-\tau_A - 3\tau_C} \quad (9)$$

We generated 10,000 neutral simulations using msms [19] for different choices of  $\tau_C$  and  $\tau_A$  (with  $\theta = 20$  in each simulation) to verify our analytic expressions were correct (Figure 2). The probability does not depend on  $\theta$ , so the choice of this value is arbitrary.

The above probabilities allows us to finally obtain  $P[i \mid y_j, \mathbf{\Omega}, \mathbf{O}]$ .

### 3.3. Estimating drift and admixture in a three-population model

Although the above method gives accurate results for a simple demographic scenario, it does not incorporate the possibility of admixture from the ancient sample to the contaminant population. This is important, as the signal of contamination may mimic the pattern of recent admixture. We will assume that, in addition to the ancient DNA sample, we also have the following data, which constitute  $\mathbf{O}$ :

1) A large panel from a population suspected to be the contaminant in the ancient DNA sample. The sample frequencies from this panel will be labeled  $\mathbf{w}$ , as before.

2) Two panels of genomes from two “anchor” populations that may be related to the ancient DNA sample. One of these populations - called population Y - may (but need not) be the same population as the contaminant and may (but need not) have received admixture from the ancient population (Figure 1.B). The sample frequencies for this population will be labeled as  $\mathbf{y}$ . The other population - called Z - will have sample frequencies labeled  $\mathbf{z}$ . We will assume the drift times separating these two populations are known (parameters  $\tau_Y$  and  $\tau_Z$  in Figure 1.B). This is a reasonable assumption as these parameters can be accurately estimated without the need of using an ancient outgroup sample, as long as admixture is not extremely high.

We can then estimate the remaining drift parameters, the error and contamination rates and the admixture time ( $\beta$ ) and rate ( $\alpha$ ) between the archaic

179 population and modern population  $Y$ . The diffusion solution for this three-  
180 population scenario with admixture is very difficult to obtain analytically.  
181 Instead, we use a numerical approximation, implemented in the program  
182 *∂a∂i* [20].

### 183 3.4. Markov Chain Monte Carlo method for inference

184 We incorporated the likelihood functions defined above into a Markov  
185 Chain Monte Carlo (MCMC) inference method, to obtain posterior proba-  
186 bility distributions for the contamination rate, the sequencing error rate, the  
187 drift times and the admixture rate. Our program - which we called 'DICE'  
188 - is coded in C++ and is freely available at: [http://grenaud.github.io/](http://grenaud.github.io/dice/)  
189 [dice/](http://grenaud.github.io/dice/). We assumed uniform prior distributions for all parameters, and the  
190 boundaries of these distributions can be modified by the user.

191 For the starting chain at step 0, an initial set of parameters  $X_0 = \{$   
192  $r_{C0}, \epsilon_0, \Omega_0 \}$  is sampled randomly from their prior distributions. At step  
193  $k$ , a new set of values for step  $k + 1$  is proposed by drawing values for each  
194 of the parameters from normal distributions. The mean of each of those  
195 distributions is the value for each parameter at state  $X_k$  and the standard  
196 deviation is the difference between the upper and lower boundary of the prior,  
197 divided by a constant that can be increased or decreased to achieve a desired  
198 rate of acceptance of new states [21]. By default, this constant is equal to  
199 1,000 for all parameters. The new state is accepted with probability:

$$P[accept] = \min \left( 1, \frac{P[\mathbf{a}, \mathbf{d} \mid X_{k+1}]}{P[\mathbf{a}, \mathbf{d} \mid X_k]} \right) \quad (10)$$

200 where  $P[\mathbf{a}, \mathbf{d} \mid X_k]$  is the likelihood defined in Equation 1.

201 Unless otherwise stated below, we ran the MCMC chain for 100,000 steps  
202 in all analyses, with a burn-in period of 40,000 and sampling every 100 steps.  
203 The sampled values were then used to construct posterior distributions for  
204 each parameter.

### 205 3.5. Multiple error rates and ancestral state misidentification

206 Fu et al. [5] showed that, when estimating contamination, ancient DNA  
207 data can be better fit by a two-error model than a single-error model. In  
208 that study, the authors co-estimate the two genome-wide error rates along  
209 with the proportion of the data that is affected by each rate. Therefore,  
210 we also included this error model as an option that the user can choose to  
211 incorporate when running our program.



Furthermore, we developed an alternative error estimation method that allows the user to flag transition polymorphisms, which are more likely to have occurred due to cytosine deamination in ancient DNA. These sites are therefore likely to be subject to different error rates than those common in present-day sequencing data [22, 23]. Our program can then estimate two error rates separately: one for transitions and one for transversions. Finally, we incorporated an option to include an ancestral state misidentification (ASM) parameter, which should serve to correct for mispolarization of alleles [24].

### 3.6. BAM file functionality

The standard input for DICE is a file containing counts of particular ancestral/derived base combinations and SNP frequencies (see README file online). As an additional feature, we also developed a module for the user to directly input a BAM file and a file containing population allele frequencies for the anchor and contaminant panels, rather than the standard input. The user can either choose to convert the BAM file to native DICE format using a program provided with the software package and then run the program, or run it directly on the BAM file. In the latter case, instead of calculating genome-wide error parameters, the program will calculate error parameters specific to each sequenced fragment, based on mapping qualities, base qualities and estimated deamination rates at each site (see Appendix B).

## 4. Results: two-population method

### 4.1. Simulations

We first used DICE to obtain posterior distributions from simulated data, under the two-population inference framework. We simulated two populations (i.e. an archaic and a modern human population) with constant population size that split a number of generations ago. For each demographic scenario tested, we generated 20,000 independent replicates ( $\theta=1$ ) in *ms* [25], making sure each simulation had at least one usable SNP. In general, this yielded  $\sim 80,000$  usable SNPs in total. We then proceeded to sample derived and ancestral allele counts using the same binomial sampling model we use in our inference framework, under different sequencing coverage and contamination conditions. In all simulations, the contaminant panel was the

246 same as the anchor population panel. We then applied our method to the  
247 combined set of  $\sim 80,000$  SNPs.

248 Figure 3 and 4 show parameter estimation results from various demo-  
249 graphic and contamination scenarios for a low-coverage (3X) and a high-  
250 coverage (30X) archaic genome, respectively, with low sequencing error (0.1%),  
251 and a contaminant/anchor population panel of 100 haploid genomes. In both  
252 cases, the method accurately estimates the error rate, the contamination rate  
253 and the drift parameters. All parameters are also accurately estimated for  
254 the same scenarios even if the sequencing error rate is high (10%) (Figure  
255 S1).

256 Figures 5, S2, S3, S4 show how well the method does at estimating param-  
257 eters over a wide range of contamination and drift scenarios, by displaying  
258 the absolute difference between simulated parameters and their correspond-  
259 ing posterior modes. So long as coverage is high (for example, 5X or 30X),  
260 the contamination and anchor drift parameters are accurately estimated even  
261 at 75% contamination. The method performs well even if the drift times on  
262 both sides of the tree are as small as  $\approx 0.001$  or as large as  $\approx 5$ , but starts  
263 becoming inaccurate when contamination is extremely high. In general, the  
264 contamination rate and anchor drifts are easier to determine than the drift  
265 corresponding to the ancient population.

266 We find that for samples of very low coverage (0.5X, 1X, 1.5X) we re-  
267 quire a larger number of sites to obtain accurate estimates (Figures S5, S6,  
268 S7). For example, for a sample of 0.5X coverage, we tried different numbers  
269 of independent replicate simulations and found that at 800,000 replicates,  
270 we obtained approximately 1.6 million valid SNPs for inference, which was  
271 enough to reach reasonable levels of accuracy (Figure S14). We note that this  
272 number of SNPs is approximately the same as what is available, for example,  
273 in the low-coverage (0.5X) Mezmaiskaya Neanderthal genome [4], which con-  
274 tains about 1.55 million valid sites with coverage  $\geq 1$ , and which we analyze  
275 below. We also observed that the MCMC chain in some of these simula-  
276 tions needed a longer time to converge than when testing samples of higher  
277 coverage, especially when contamination is very high, and so in this set of  
278 simulations, we ran it for 1 million steps instead of 100,000, with a burn-in of  
279 940,000 steps and sampling every 100 steps. Finally, we note that our failure  
280 to recover the true parameters under low coverage in a single MCMC run is  
281 partly due to the chain failing to converge. Indeed, when we run the MCMC  
282 10 times and recover the estimates from the chain with the highest posterior  
283 probability, we are able to obtain increased accuracy relative to the single

run, especially when the drift parameters are extremely low and when the contamination rate is extremely high (Figures S8, S9, S10).

Finally, we tested the method on simulations in a more realistic scenario, in which we generated ancient and contaminant fragments based on empirical fragment sizes and then mapped them to a simulated reference genome using BWA [26] with default parameters. We produced DNA sequences from the output of msms [19] via seq-gen v.1.3.3 [27] with the HKY substitution model [28]. This allows for multiple substitutions to occur at the same site since the split from chimpanzee (which could cause ASM). We then simulated ancient DNA fragments that had a fragment size distribution emulating empirical distributions. Contaminant fragments were also sampled from the contaminant population. We used the deamination rates from the single-stranded library from the Loschbour ancient individual [29] ( $\sim 8\%$  at the 5' end and  $\sim 34\%$  at the 3' end with a residual deamination rate of  $\sim 1\%$  along the whole fragment) to artificially deaminate the ancient fragments. We simulated sequencing errors on both the ancient and contaminant fragments using empirical sequencing error rates from a PhiX library (Illumina Corp.) sequenced at the Max Planck Institute for Evolutionary Anthropology on an Illumina HiSeq, basecalled using freeIbis[30]. With the same empirical PhiX dataset distribution, we generated quality scores for each nucleotide. Fragments were mapped back to a random individual from the contaminant panel. Figure 6 shows DICE's performance on this scenario with different error models. In all cases, we find that the parameters are estimated with high accuracy. As expected, the ts/tv model infers a higher error rate at transitions, due to the additional errors introduced by deamination on the ends of the ancient fragments.

#### 4.2. Performance under violations of model assumptions

We evaluated the consequences of different violations of model assumptions. We started by observing the effects of using a small modern human panel. Figure S12 shows results for cases in which the contaminant/anchor panel is made up of only 20 haploid genomes. In this case, all parameters are estimated accurately, with only a slight bias towards overestimating the drift parameters, presumably because the low sampling of individuals acts as a population bottleneck, artificially increasing the drift time parameters estimated.

Additionally, we simulated a scenario in which only a single human contaminated the sample. That is, rather than drawing contaminant fragments

321 from a panel of individuals, we randomly picked a set of two chromosomes  
322 at each unlinked site and only drew contaminant fragments from those two  
323 chromosomes. Figure S13 shows that inference is robust to this scenario,  
324 unless the contamination rate is very high (25%). In that case, the drift  
325 of the archaic genome is substantially under-estimated, but the error, con-  
326 tamination and anchor drift parameters only show slight inaccuracies in the  
327 estimate.

328 We then investigated the effect of admixture in the anchor/contaminant  
329 population from the archaic population, occurring after their divergence,  
330 which we did not account for in the simple, two-population model (Figure  
331 S11). In this case, the error and the contamination rates are accurately  
332 estimated, but both drift times are underestimated. This is to be expected,  
333 as admixture will tend to homogenize allele frequencies and thereby reduce  
334 the apparent drift separating the two populations.

### 335 4.3. Identifying the contaminant population

336 We sought to see whether we would use our method to identify the con-  
337 taminant population, from among a set of candidate contaminants (for ex-  
338 ample, different present-day human panels). Because our MCMC samples  
339 are samples from the posterior distribution of the parameters and not the  
340 marginal likelihood of the data over the entire parameter space, we cannot  
341 perform proper Bayesian model selection. Instead, we used the posterior  
342 mode as a heuristic statistic that may suggest which panel is most likely to  
343 have contaminated the sample. We validated this choice of statistic using  
344 simulations under a variety of demographic scenarios (Figure S15). We sim-  
345 ulated 5-population trees of varying drift times. The outgroup was chosen  
346 to be the ancient population and the rest were chosen to be the present-day  
347 human populations (A, B, C and D). One of the populations (A) was the  
348 true contaminant. To add another layer of complexity, we also allowed for  
349 admixture (at 0%, 5% and 50% rate) from the ancient population to the an-  
350 cestral population of A and B. We then ran our MCMC method four times  
351 on each of these demographic scenarios, using D as the anchor and different  
352 panels as the putative contaminant in each run.

353 Figure S16 shows that the lowest posterior mode always corresponds to  
354 the run that uses the true contaminant (A), and that the mode decreases  
355 the farther the tested contaminant is from the true contaminant in the tree.  
356 Additionally, Figures S17, S18, S19 show the effect of misspecifying the con-  
357 taminant panel for different admixture scenarios. The error rate and the an-

chor drift time are correctly estimated, even when the candidate contaminant is highly diverged from the true contaminant, while the other two parameters are more sensitive to misspecification. In general, the correct candidate contaminant produces the highest posterior probability and yields the best parameter estimates.

#### 4.4. Empirical data

We first applied our method to published ancient DNA data from a high-coverage genome (52X) from Denisova cave in Siberia (the Altai Neanderthal) [4], and visually ensured that the chain had converged. The demographic, error and contamination estimates are shown in Table 1. We used the African (AFR) 1000 Genomes Phase 3 panel [16] as the anchor population. The drift times estimated for both samples are consistent with the known demographic history of Neanderthals and modern humans, and the contamination rates largely agree with previous estimates (see Discussion below).

We ran our method with different putative contaminant panels: Africans (AFR), East Asians (EAS), Native Americans (AMR), Europeans (EUR), South Asians (SAS). For the Altai sample, we observe a contamination rate of  $\sim 1\%$  and an error rate of  $\sim 0.1\%$ , regardless of which panel we use. Furthermore, the drift on the Neanderthal side of the tree seems to be 6 times as large as the drift on the modern human side of the tree, reflecting the smaller effective population size of Neanderthals after their divergence. The EUR panel is the one with the highest posterior mode (Table 1).

We then tested a variety of ancient DNA nuclear genome sequences at different levels of coverage, obtained via different methods (shotgun sequencing and SNP capture) and from different hominin groups (modern humans and Neanderthals). We used AFR as the anchor panel and either AFR (Table S1) or EUR (Table S2) as the contaminant panel. For samples of high and medium average coverage, the MCMC converges to reasonable values for all parameters. For example, we estimate the ancient population drift parameter ( $\tau_A$ ) to be larger in Neanderthals than in various modern humans sampled across Eurasia, as the effective population size of the former was smaller and their split time to Africans was larger.

However, for samples of very low coverage, we observe a failure of some of the parameters to properly converge, as the MCMC seems to get stuck in the boundaries of parameter space. We tested different boundaries and the problem remains. This appears to be less of a problem when using AFR as the putative contaminant panel than when using EUR as the putative

contaminant panel, presumably because of the larger amount of SNPs that may be informative for inference. In the former case, we only observe this problem when samples are at lower than  $\sim 0.5X$  coverage. In the latter case, we observe the problem for samples at lower than  $\sim 3X$  coverage.

For example, the low-coverage Neanderthal genome (0.5X) from Mezmaiskaya Cave in Western Russia [4] seems to converge to parameters within the prior boundaries when using AFR as the contaminant panel but the ancient population drift gets stuck in the upper limit of parameter space when any of the other panels are used as contaminants (Table S3). Regardless of which contaminant panel is used, there is good agreement with the modern human drift parameter obtained when using the Altai Neanderthal genome. However, we note that when using non-African populations as the contaminants, we obtain a higher ( $\sim 5\%$ ) contamination rate in the Mezmaiskaya Neanderthal than in the Altai Neanderthal. It is currently unclear to us whether this is due to the MCMC failing to properly converge or to a real feature of the data.

**Table 1.** Posterior modes of parameter estimates under the two-population inference framework for the Altai Neanderthal autosomal genome. We used different 1000G populations as candidate contaminants. Africans were the anchor population in all cases, so the modern human drift is with respect to Africans. Values in parentheses are 95% posterior quantiles.

| Contaminant panel | Anchor panel | Error rate                  | Contamination rate          | Modern human drift       | Neanderthal drift        | Log-posterior mode |
|-------------------|--------------|-----------------------------|-----------------------------|--------------------------|--------------------------|--------------------|
| EUR               | AFR          | 0.12%<br>(0.119% – 0.12%)   | 0.952%<br>(0.949% – 0.956%) | 0.414<br>(0.411 – 0.414) | 2.497<br>(2.49 – 2.504)  | -6476175.868       |
| AMR               | AFR          | 0.118%<br>(0.118% – 0.118%) | 0.964%<br>(0.963% – 0.967%) | 0.414<br>(0.411 – 0.414) | 2.499<br>(2.494 – 2.506) | -6484270.973       |
| SAS               | AFR          | 0.12%<br>(0.12% – 0.121%)   | 0.95%<br>(0.946% – 0.951%)  | 0.411<br>(0.411 – 0.414) | 2.496<br>(2.493 – 2.5)   | -6489357.978       |
| EAS               | AFR          | 0.13%<br>(0.129% – 0.13%)   | 0.888%<br>(0.888% – 0.891%) | 0.414<br>(0.412 – 0.414) | 2.493<br>(2.488 – 2.493) | -6521082.384       |
| AFR               | AFR          | 0.112%<br>(0.111% – 0.112%) | 0.969%<br>(0.966% – 0.973%) | 0.412<br>(0.41 – 0.413)  | 2.495<br>(2.495 – 2.504) | -6574080.092       |

We sought to determine the robustness of our results to different levels of GC content. We did this because we initially hypothesized that endogenous DNA might be preserved at lower rates when GC content is low, leading to the presence of proportionally more contaminant DNA. We partitioned the Altai Neanderthal genome into three different regions of low (0% – 30%), medium (31% – 69%) and high (70% – 100%) GC content, using the 'GC content'



417 track downloaded from the UCSC genome browser [31]. We then used the  
 418 two-population method to infer contamination, error and drift parameters,  
 419 using Africans as the anchor population and Europeans as the contaminant  
 420 population (Figure S20). We observe that contamination rates are higher in  
 421 low-GC regions than in medium-GC regions (Welch one-sided t-test on the  
 422 posterior samples,  $P < 2.2e-16$ ), which in turn have higher contamination  
 423 rates than high-GC regions ( $P < 2.2e-16$ ). The opposite trend occurs in the  
 424 error estimates, while the drift parameters are largely unaffected. However,  
 425 we find that the differences we observe across GC levels are almost entirely  
 426 eliminated by removing CpG sites from the input dataset (Figure S20), as  
 427 CpG sites are known to have higher mutation rates than the rest of the  
 428 genome. For this reason, we recommend filtering them out when testing for  
 429 contamination on ancient DNA datasets, which is what was done in Tables  
 430 1 and 2.

431 Finally, we tested a present-day Yoruba genome (HGDP00936) sequenced  
 432 to high coverage [4], which should not contain any contamination. Indeed,  
 433 when applying our method, we find this to be the case (Figure S21). We  
 434 infer 0% contamination, regardless of whether we use EUR or AFR as the  
 435 candidate contaminant. Furthermore, the anchor drift time is very close to  
 436 0 when using AFR as the anchor population (as the sample belongs to that  
 437 same population), while it is non-zero ( $= 0.22$ ) when using EUR, which is  
 438 consistent with the drift time separating Europeans from the ancestor of  
 439 Europeans and their closest African sister populations [32].

## 440 5. Results: three-population method

### 441 5.1. Simulations

442 We applied our three-population method to estimate both drift times  
 443 and admixture rates. We simulated a high-coverage (30X) archaic human  
 444 genome under various demographic and contamination scenarios. Each of the  
 445 two anchor population panels contained 20 haploid genomes. The admixture  
 446 time was 0.08 drift units ago, which under a constant population size of  
 447  $2N=20,000$  would be equivalent to 1,600 generations ago. When running our  
 448 inference program, we set the admixture time prior boundaries to be between  
 449 0.06 and 0.1 drift units ago.

450 We find that the admixture time is inaccurately estimated under this  
 451 implementation - likely due to lack of information in the site-frequency spec-  
 452 trum - so we do not show estimates for that parameter below. For admixture

rates of 0%, 5% or 20%, the error and contamination parameters are estimated accurately in all cases (Figures S22, S23 and S24, respectively). The method is less accurate when estimating the demographic parameters, especially the admixture rate which is sometimes under-estimated. Importantly though, the accuracy of the contamination rate estimates are not affected by incorrect estimation of the demographic parameters.

We also tested what would happen if the admixture time was simulated to be recent: 0.005 drift units ago, or 100 generations ago under a constant population size of  $2N=20,000$ . When estimating parameters, we set the prior for the admixture time to be between 0 and 0.01 drift units ago. In this last case, we observe that the drift times and the admixture rate (20%) are more accurately estimated than when the admixture event is ancient (Figure 7).

As before, we also verified that the posterior mode was a good proxy to identify the true contaminant (A), when running the MCMC using different contaminant panels (A, B, C and D). In all cases, we used D as the unadmixed anchor panel and B as the admixed anchor panel. Results are shown in Figure S25 for all the demographic scenarios from Figure S15. Again, we observe that the true contaminant (A) is always the one that corresponds to the lowest posterior probability, though we again caution that because we do not have the marginal probabilities, we cannot formally perform model selection to favor a particular panel. Furthermore, the admixture rate from the ancient population into the ancestors of A and B is robustly estimated unless the true contaminant (A) is highly diverged from the candidate contaminant (Figures S26, S27, S28, for admixture rates of 0%, 5% and 50%, respectively).

## 5.2. Empirical data

We also applied the three-population inference framework to the high-coverage Altai Neanderthal genome. We first estimated the two drift times specific to Europeans and Africans after the split from each other ( $\tau_Y$  and  $\tau_Z$ , respectively), using  $\partial a \partial i$  and the L-BFGS-B likelihood optimization algorithm [13], but without using the archaic genome ( $\tau_{Afr} = 0.009$ ,  $\tau_{Eur} = 0.255$ ). Then, we used our MCMC method to estimate the rest of the drift times, the archaic admixture rate and the contamination and error parameters in the Neanderthal genome. We set the admixture time prior boundaries to be between 0.06 and 0.1 drift units ago, which is a realistic time frame given knowledge about modern human - Neanderthal cohabitation in Eurasia [33]. The error rate and contamination rates we obtain are similar to those obtained under the two-population method, and we estimate an admixture



rate from Neanderthals into modern humans of 1.72% for the choice of contaminant panel with the highest posterior mode - which is again EUR (Table 2).

**Table 2.** Posterior modes of parameter estimates under the three-population inference framework for the Altai Neanderthal autosomal genome. We used different 1000G populations as candidate contaminants. In all cases, Africans were the unadmixed anchor population and Europeans were the admixed anchor population. The ancestral human drift refers to the drift in the modern human branch before the split of Europeans and Africans. The post-split European-specific and African-specific drifts were estimated separately without the archaic genome ( $\tau_{Afr} = 0.009$ ,  $\tau_{Eur} = 0.255$ ).

| Contaminant panel | Unadmixed anchor panel | Admixed anchor panel | Error rate                  | Contamination rate          | Ancestral human drift    | Neanderthal drift        | Admixture rate              | Log-posterior mode |
|-------------------|------------------------|----------------------|-----------------------------|-----------------------------|--------------------------|--------------------------|-----------------------------|--------------------|
| EUR               | AFR                    | EUR                  | 0.119%<br>(0.119% – 0.12%)  | 0.967%<br>(0.954% – 0.967%) | 0.411<br>(0.405 – 0.414) | 2.669<br>(2.656 – 2.689) | 1.72%<br>(1.682% – 1.805%)  | -7452958.125       |
| AMR               | AFR                    | EUR                  | 0.119%<br>(0.118% – 0.12%)  | 0.967%<br>(0.962% – 0.974%) | 0.407<br>(0.402 – 0.412) | 2.677<br>(2.651 – 2.708) | 1.661%<br>(1.618% – 1.696%) | -7461041.325       |
| SAS               | AFR                    | EUR                  | 0.122%<br>(0.122% – 0.123%) | 0.95%<br>(0.944% – 0.955%)  | 0.399<br>(0.398 – 0.406) | 2.682<br>(2.677 – 2.695) | 1.469%<br>(1.422% – 1.48%)  | -7465214.726       |
| EAS               | AFR                    | EUR                  | 0.13%<br>(0.129% – 0.132%)  | 0.896%<br>(0.884% – 0.903%) | 0.421<br>(0.413 – 0.428) | 2.702<br>(2.658 – 2.706) | 2.388%<br>(2.009% – 2.447%) | -7509504.053       |
| AFR               | AFR                    | EUR                  | 0.117%<br>(0.117% – 0.119%) | 0.957%<br>(0.945% – 0.964%) | 0.409<br>(0.409 – 0.418) | 2.681<br>(2.66 – 2.702)  | 1.837%<br>(1.766% – 1.961%) | -7554080.773       |

We also applied the method to the low-coverage Mezmaiskaya Neanderthal genome. As before, we are able to reach convergence for all parameters (including the admixture rate) with the exception of the Neanderthal drift, which gets stuck in the upper boundary of parameter space (Table S4).

## 6. Discussion

We have developed a new method to jointly infer demographic parameters, along with contamination and error rates, when analyzing an ancient DNA sample. The method can be deployed using a C++ program (DICE) that is easy to use and freely downloadable. We therefore expect it to be highly applicable in the field of paleogenomics, allowing researchers to derive useful information from previously unusable (highly contaminated) samples, including archaic humans like Neanderthals, as well as ancient modern humans.

Applications to simulations show that the error and contamination parameters are estimated with high accuracy, and that demographic parameters

can also be estimated accurately so long as enough information (e.g. a large panel of modern humans) is available. The drift time estimates reflect how much genetic drift has acted to differentiate the archaic and modern populations since the split from their common ancestral population, and can be converted to divergence times in generations if an accurate history of population size changes is also available (for example, via methods like PSMC, [34]). Although we cannot perform proper model testing, we found via extensive simulations that the posterior mode of an MCMC run was a robust heuristic statistic to help detect which panel was most likely to have contaminated the sample. We caution, however, that the fact that a particular panel yields a higher posterior mode than another is no guarantee that it is a better fit to the data for demographic scenarios that may be different from the ones we simulated.

We also applied our method to empirical data, specifically to two Neanderthal genomes at high and low coverage, a present-day high-coverage Yoruba genome, and several ancient genome sequences of varying degrees of coverage, some obtained via shotgun-sequencing and some via SNP capture. For the high-coverage Yoruba genome, we infer no contamination, as would be expected from a modern-day sample, and drift times indicating the Yoruba sample indeed belongs to an African population.

The contamination and sequencing error estimates we obtained for the Altai Neanderthal are roughly in accordance with previous estimates [4]. The drift times we obtain under the three-population model for the African population ( $\tau_C + \tau_{Afr}$ ) are approximately  $0.411 + 0.009 = 0.42$  drift units. The geometric mean of the history of population sizes from the PSMC results in Prüfer et al. [4] give roughly that  $N_e \approx 21,818$  since the African population size history started differing from that of Neanderthals, assuming a mutation rate of  $1.25 \times 10^{-8}$  per bp per generation. If we assume a generation time of 29 years, and use our drift time in the equation relating divergence time in generations to drift time ( $t/(2N_e) \approx \tau$ ), this gives an approximate human-Neanderthal population divergence time of 531,486 years. This number roughly agrees with the most recent estimates obtained via other methods [4]. Additionally, the Neanderthal-specific drift time is approximately 6.5 times as large as the modern human drift time, which is expected as Neanderthals had much smaller population sizes than modern humans [35, 4]. The admixture rate from archaic to modern humans that we estimate is 1.72%, which is consistent with the rate estimate obtained via methods that do not jointly model contamination (1.5 – 2.1%) [4]. In

the case of the Altai Neanderthal, we observe that the sample was probably contaminated by one or more individuals with European ancestry.

When testing modern human and Neanderthal ancient genomes of lower coverage than the Altai Neanderthal, we obtain reasonable parameter estimates for samples of medium to high-coverage. However, we run into problems in estimation when the samples are of low coverage. For these reasons, and from our simulation results, we recommend that our method should be used on nuclear genomes with  $> 3X$  coverage. The method may converge under certain conditions at coverages as low as  $0.5X$  (for example, in the case of the Mezmaiskaya genome under the two-population model when using AFR as the anchor and contaminant panel), but, in such cases, we caution the user to check convergence is achieved before drawing any conclusions from the estimates. For SNP capture data, we obtain reliable estimates for samples with a minimum coverage of 500,000 sites that are polymorphic in the anchor panel.

The demographic models used in our approach are simple, involving no more than three populations and a single admixture event. This is partly due to limitations of known theory about the diffusion-based likelihood of an arbitrarily complex demography for the 2-D site-frequency spectrum - in the case of the two-population method - and to the inability of  $\partial a \partial i$  [20] to handle more than 3 populations at a time. In recent years, several studies have made advances in the development of methods to compute the likelihood of an SFS for larger numbers of populations using coalescent theory [36, 37, 38], with multiple population size changes and admixture events. We hope that some of these techniques could be incorporated in future versions of our inference framework.

## 7. Acknowledgments

We thank Kelley Harris, Philip Johnson, Graham Coop, Nicolas Duforet-Frebourg, Joshua Schraiber, Sergi Castellano, Christoph Theunert, Janet Kelso, Rasmus Nielsen and members of the Slatkin and Nielsen labs for helpful advice and discussions.

## 8. References

- [1] R. E. Green, J. Krause, A. W. Briggs, T. Maricic, U. Stenzel, M. Kircher, N. Patterson, H. Li, W. Zhai, M. H.-Y. Fritz, et al., A draft sequence of the Neandertal genome, *Science* 328 (2010) 710–722.

- 581 [2] D. Reich, R. E. Green, M. Kircher, J. Krause, N. Patterson, E. Y. Du-  
582 rand, B. Viola, A. W. Briggs, U. Stenzel, P. L. Johnson, et al., Genetic  
583 history of an archaic hominin group from Denisova Cave in Siberia, Na-  
584 ture 468 (2010) 1053–1060.
- 585 [3] M. Meyer, M. Kircher, M.-T. Gansauge, H. Li, F. Racimo, S. Mallick,  
586 J. G. Schraiber, F. Jay, K. Prüfer, C. de Filippo, et al., A high-coverage  
587 genome sequence from an archaic Denisovan individual, Science 338  
588 (2012) 222–226.
- 589 [4] K. Prüfer, F. Racimo, N. Patterson, F. Jay, S. Sankararaman, S. Sawyer,  
590 A. Heinze, G. Renaud, P. H. Sudmant, C. de Filippo, et al., The com-  
591 plete genome sequence of a neanderthal from the altai mountains, Na-  
592 ture 505 (2014) 43–49.
- 593 [5] Q. Fu, H. Li, P. Moorjani, F. Jay, S. M. Slepchenko, A. A. Bondarev,  
594 P. L. Johnson, A. Aximu-Petri, K. Prüfer, C. de Filippo, et al., Genome  
595 sequence of a 45,000-year-old modern human from western Siberia, Na-  
596 ture 514 (2014) 445–449.
- 597 [6] A. Seguin-Orlando, T. S. Korneliussen, M. Sikora, A.-S. Malaspinas,  
598 A. Manica, I. Moltke, A. Albrechtsen, A. Ko, A. Margaryan, V. Moi-  
599 seyev, et al., Genomic structure in Europeans dating back at least 36,200  
600 years, Science 346 (2014) 1113–1118.
- 601 [7] R. E. Green, A.-S. Malaspinas, J. Krause, A. W. Briggs, P. L. John-  
602 son, C. Uhler, M. Meyer, J. M. Good, T. Maricic, U. Stenzel, et al.,  
603 A complete Neandertal mitochondrial genome sequence determined by  
604 high-throughput sequencing, Cell 134 (2008) 416–426.
- 605 [8] R. E. Green, A. W. Briggs, J. Krause, K. Prüfer, H. A. Burbano,  
606 M. Siebauer, M. Lachmann, S. Pääbo, The Neandertal genome and  
607 ancient DNA authenticity, The EMBO journal 28 (2009) 2494–2502.
- 608 [9] S. Sawyer, G. Renaud, B. Viola, J.-J. Hublin, M.-T. Gansauge, M. V.  
609 Shunkov, A. P. Derevianko, K. Prüfer, J. Kelso, S. Pääbo, Nuclear and  
610 mitochondrial dna sequences from two denisovan individuals, Proceed-  
611 ings of the National Academy of Sciences 112 (2015) 15696–15700.

- 612 [10] P. Skoglund, J. Storå, A. Götherström, M. Jakobsson, Accurate sex  
613 identification of ancient human remains using DNA shotgun sequencing,  
614 *Journal of Archaeological Science* 40 (2013) 4477–4482.
- 615 [11] M. Rasmussen, X. Guo, Y. Wang, K. E. Lohmueller, S. Rasmussen,  
616 A. Albrechtsen, L. Skotte, S. Lindgreen, M. Metspalu, T. Jombart, et al.,  
617 An aboriginal australian genome reveals separate human dispersals into  
618 asia, *Science* 334 (2011) 94–98.
- 619 [12] T. S. Korneliussen, A. Albrechtsen, R. Nielsen, ANGSD: analysis of  
620 next generation sequencing data, *BMC Bioinformatics* 15 (2014) 356.
- 621 [13] R. H. Byrd, P. Lu, J. Nocedal, C. Zhu, A limited memory algorithm for  
622 bound constrained optimization, *SIAM Journal on Scientific Computing*  
623 16 (1995) 1190–1208.
- 624 [14] P. Skoglund, B. H. Northoff, M. V. Shunkov, A. P. Derevianko, S. Pääbo,  
625 J. Krause, M. Jakobsson, Separating endogenous ancient DNA from  
626 modern day contamination in a Siberian Neandertal, *Proceedings of the*  
627 *National Academy of Sciences* 111 (2014) 2229–2234.
- 628 [15] G. Renaud, V. Slon, A. T. Duggan, J. Kelso, Schmutzi: estimation  
629 of contamination and endogenous mitochondrial consensus calling for  
630 ancient dna, *Genome biology* 16 (2015) 1–18.
- 631 [16] . G. P. Consortium, et al., A global reference for human genetic variation,  
632 *Nature* 526 (2015) 68–74.
- 633 [17] W. J. Ewens, *Mathematical Population Genetics 1: I. Theoretical In-*  
634 *troduction*, volume 27, Springer Science & Business Media, 2004.
- 635 [18] H. Chen, R. E. Green, S. Pääbo, M. Slatkin, The joint allele-frequency  
636 spectrum in closely related species, *Genetics* 177 (2007) 387–398.
- 637 [19] G. Ewing, J. Hermisson, MSMS: a coalescent simulation program in-  
638 cluding recombination, demographic structure and selection at a single  
639 locus, *Bioinformatics* 26 (2010) 2064–2065.
- 640 [20] R. N. Gutenkunst, R. D. Hernandez, S. H. Williamson, C. D. Busta-  
641 mante, Inferring the joint demographic history of multiple populations  
642 from multidimensional SNP frequency data, *PLoS Genetics* 5 (2009)  
643 e1000695.

- 644 [21] G. O. Roberts, A. Gelman, W. R. Gilks, et al., Weak convergence and  
645 optimal scaling of random walk Metropolis algorithms, *The Annals of*  
646 *Applied Probability* 7 (1997) 110–120.
- 647 [22] M. Hofreiter, V. Jaenicke, D. Serre, A. von Haeseler, S. Pääbo, Dna se-  
648 quences from multiple amplifications reveal artifacts induced by cytosine  
649 deamination in ancient dna, *Nucleic acids research* 29 (2001) 4793–4799.
- 650 [23] A. W. Briggs, U. Stenzel, M. Meyer, J. Krause, M. Kircher, S. Pääbo,  
651 Removal of deaminated cytosines and detection of in vivo methylation  
652 in ancient dna, *Nucleic acids research* 38 (2010) e87–e87.
- 653 [24] R. D. Hernandez, S. H. Williamson, C. D. Bustamante, Context depen-  
654 dence, ancestral misidentification, and spurious signatures of natural  
655 selection, *Molecular Biology and Evolution* 24 (2007) 1792–1800.
- 656 [25] R. R. Hudson, Generating samples under a wright–fisher neutral model  
657 of genetic variation, *Bioinformatics* 18 (2002) 337–338.
- 658 [26] H. Li, R. Durbin, Fast and accurate short read alignment with burrows–  
659 wheeler transform, *Bioinformatics* 25 (2009) 1754–1760.
- 660 [27] A. Rambaut, N. C. Grass, Seq-gen: an application for the monte carlo  
661 simulation of dna sequence evolution along phylogenetic trees, *Computer*  
662 *applications in the biosciences: CABIOS* 13 (1997) 235–238.
- 663 [28] M. Hasegawa, H. Kishino, T.-a. Yano, Dating of the human-ape split-  
664 ting by a molecular clock of mitochondrial dna, *Journal of molecular*  
665 *evolution* 22 (1985) 160–174.
- 666 [29] I. Lazaridis, N. Patterson, A. Mitnik, G. Renaud, S. Mallick, K. Kir-  
667 sanow, P. H. Sudmant, J. G. Schraiber, S. Castellano, et al., Ancient  
668 human genomes suggest three ancestral populations for present-day Eu-  
669 ropeans, *Nature* 513 (2014) 409–413.
- 670 [30] G. Renaud, M. Kircher, U. Stenzel, J. Kelso, freeibis: an efficient base-  
671 caller with calibrated quality scores for illumina sequencers, *Bioinform-*  
672 *atics* 29 (2013) 1208–1209.
- 673 [31] K. R. Rosenbloom, J. Armstrong, G. P. Barber, J. Casper, H. Clawson,  
674 M. Diekhans, T. R. Dreszer, P. A. Fujita, L. Guruvadoo, M. Haeussler,

- et al., The ucsc genome browser database: 2015 update, *Nucleic acids research* 43 (2015) D670–D681.
- [32] M. Lipson, P.-R. Loh, A. Levin, D. Reich, N. Patterson, B. Berger, Efficient moment-based inference of admixture parameters and sources of gene flow, *Molecular biology and evolution* 30 (2013) 1788–1802.
- [33] T. Higham, K. Douka, R. Wood, C. B. Ramsey, F. Brock, L. Basell, M. Camps, A. Arrizabalaga, J. Baena, C. Barroso-Ruiz, et al., The timing and spatiotemporal patterning of Neanderthal disappearance, *Nature* 512 (2014) 306–309.
- [34] H. Li, R. Durbin, Inference of human population history from individual whole-genome sequences, *Nature* 475 (2011) 493–496.
- [35] S. Castellano, G. Parra, F. A. Sánchez-Quinto, F. Racimo, M. Kuhlwilm, M. Kircher, S. Sawyer, Q. Fu, A. Heinze, B. Nickel, et al., Patterns of coding variation in the complete exomes of three Neandertals, *Proceedings of the National Academy of Sciences* 111 (2014) 6666–6671.
- [36] H. Chen, The joint allele frequency spectrum of multiple populations: a coalescent theory approach, *Theoretical Population Biology* 81 (2012) 179–195.
- [37] E. M. Jewett, N. A. Rosenberg, Theory and applications of a deterministic approximation to the coalescent model, *Theoretical Population Biology* 93 (2014) 14–29.
- [38] J. A. Kamm, J. Terhorst, Y. S. Song, Efficient computation of the joint sample frequency spectra for multiple populations, *arXiv preprint arXiv:1503.01133* (2015).
- [39] W. Haak, I. Lazaridis, N. Patterson, N. Rohland, S. Mallick, B. Llamas, G. Brandt, S. Nordenfelt, E. Harney, K. Stewardson, et al., Massive migration from the steppe was a source for indo-european languages in europe, *Nature* (2015).
- [40] M. Rasmussen, M. Sikora, A. Albrechtsen, T. S. Korneliussen, J. V. Moreno-Mayar, G. D. Poznik, C. P. Zollikofer, M. S. P. de León, M. E. Allentoft, I. Moltke, et al., The ancestry and affiliations of kennewick man, *Nature* (2015).



- 707 [41] M. Raghavan, P. Skoglund, K. E. Graf, M. Metspalu, A. Albrechtsen,  
708 I. Moltke, S. Rasmussen, T. W. Stafford Jr, L. Orlando, E. Metspalu,  
709 et al., Upper palaeolithic siberian genome reveals dual ancestry of native  
710 americans, *Nature* 505 (2014) 87–91.
- 711 [42] M. Kimura, Solution of a process of random genetic drift with a contin-  
712 uous model, *Proceedings of the National Academy of Sciences* 41 (1955)  
713 144.
- 714 [43] M. Abramowitz, I. A. Stegun, *Handbook of mathematical functions*,  
715 Dover New York, 1965.
- 716 [44] J. F. Crow, M. Kimura, *An Introduction to population genetics theory*,  
717 Harper and Row, New York, Evanston, London, 1970.
- 718 [45] A. Ginolhac, M. Rasmussen, M. T. P. Gilbert, E. Willerslev, L. Or-  
719 lando, mapdamage: testing for damage patterns in ancient dna se-  
720 quences, *Bioinformatics* 27 (2011) 2153–2155.
- 721 [46] H. Jónsson, A. Ginolhac, M. Schubert, P. L. Johnson, L. Orlando, map-  
722 damage2. 0: fast approximate bayesian estimates of ancient dna damage  
723 parameters, *Bioinformatics* 29 (2013) 1682–1684.



724 **9. Figures**

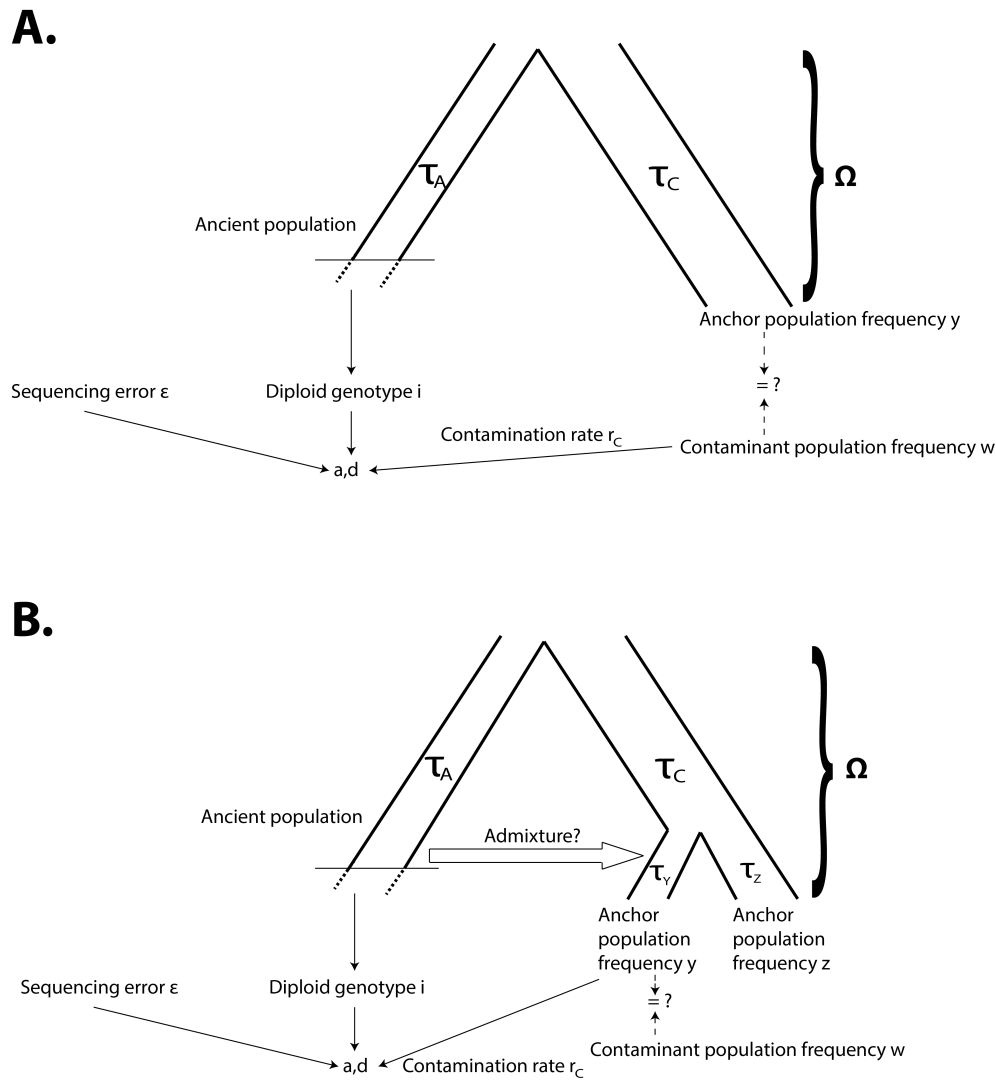

**Figure 1.** A) Schematic of two-population modeling framework: at each site, derived and ancestral fragments ( $a$ ,  $d$ ) are binomially sampled from the true genotype of the archaic individual, with some amount of contamination and error. In turn, the true genotype depends on a demographic model, which can include the contaminant population. B) Schematic of three-population modeling framework, incorporating admixture between the archaic population and one of two anchor populations.

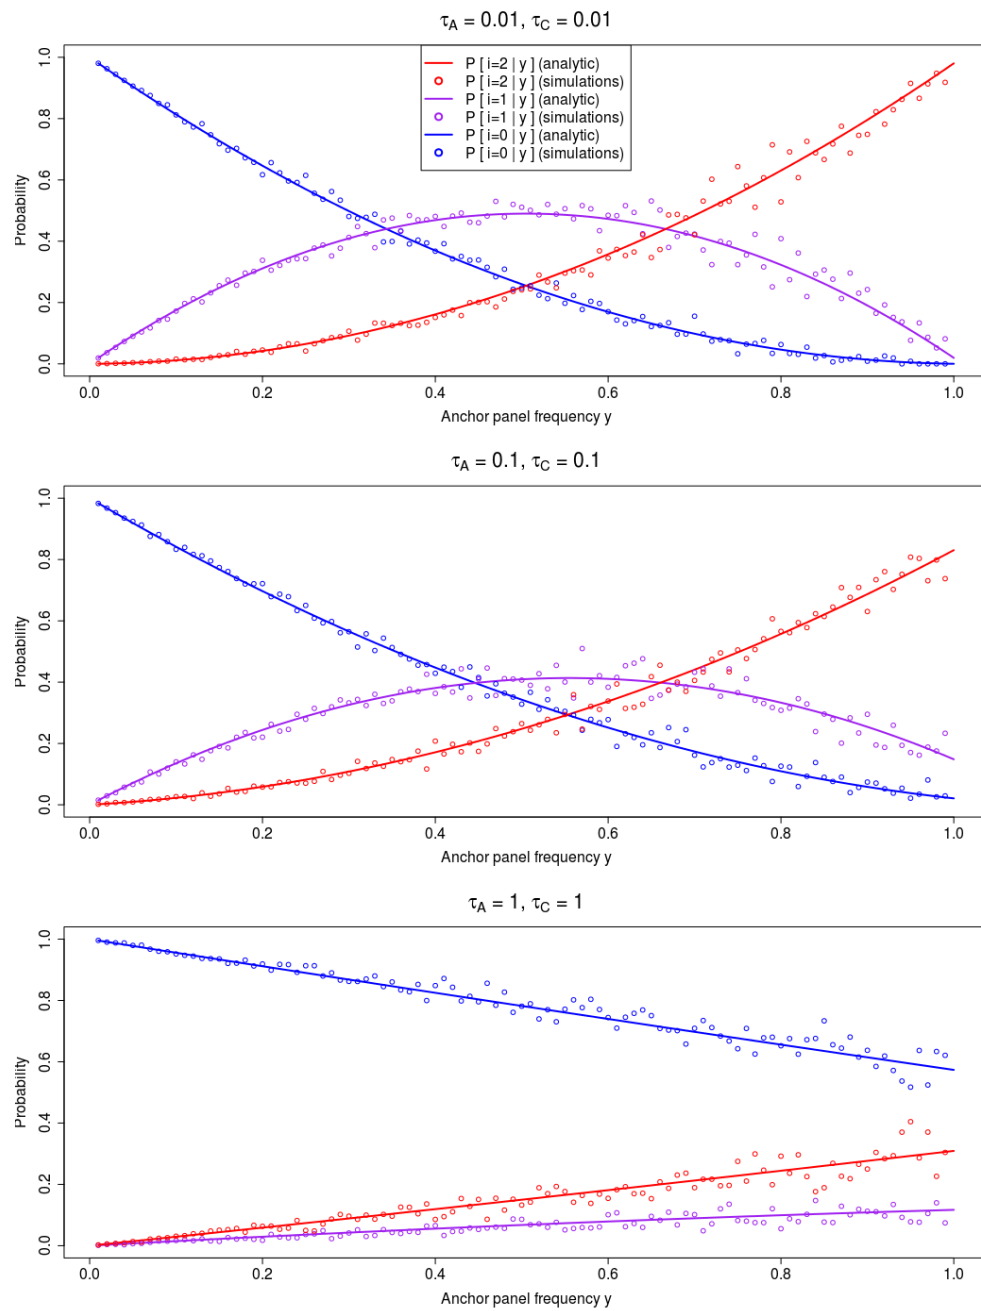

**Figure 2.** Comparison of analytic solutions to  $P[i|y, \tau_C, \tau_A]$  and simulations under neutrality from msms, for different choices of  $\tau_A$  and  $\tau_C$ .

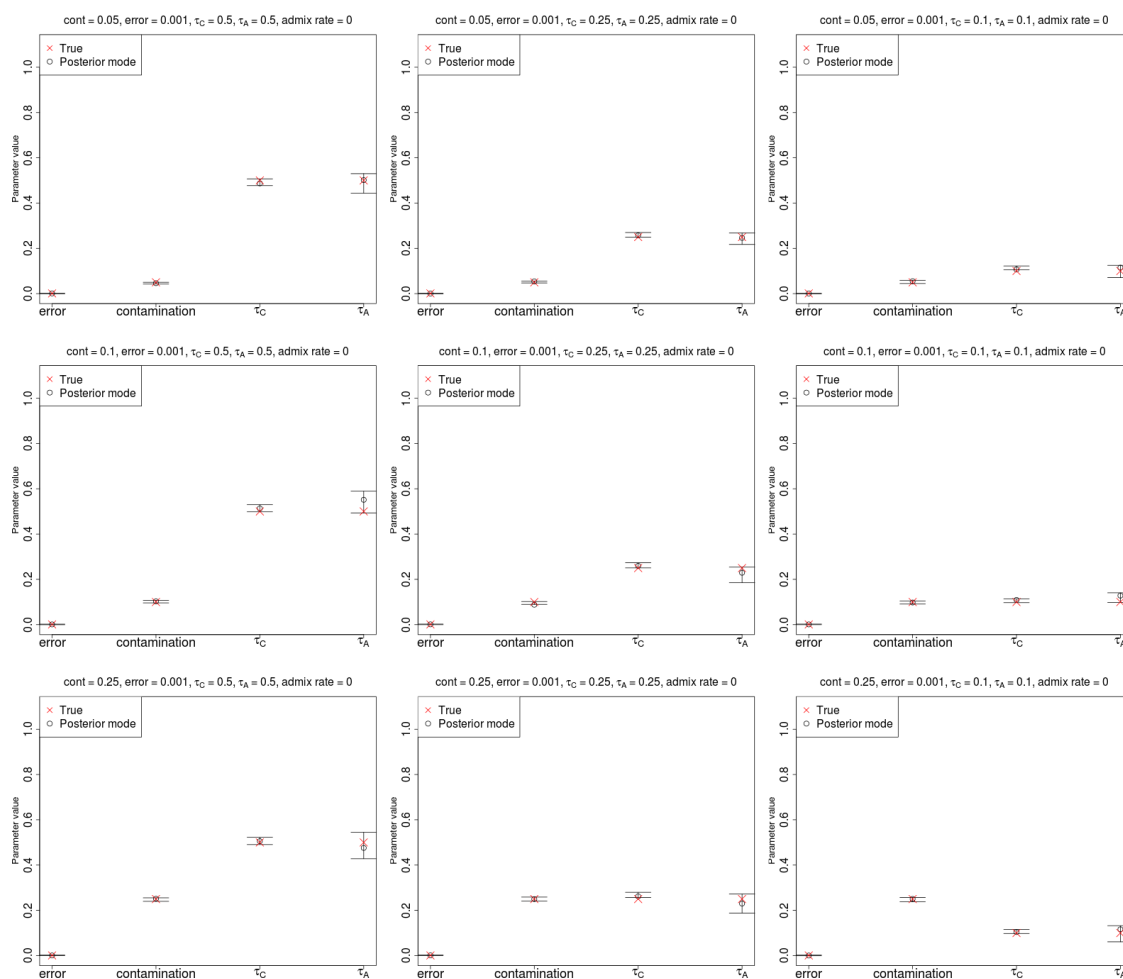

**Figure 3.** Estimation of parameters for a low-coverage ancient DNA genome (3X) with low sequencing error (0.1%), no admixture and a large anchor population panel (100 haploid genomes). Error bars represent 95% posterior intervals.

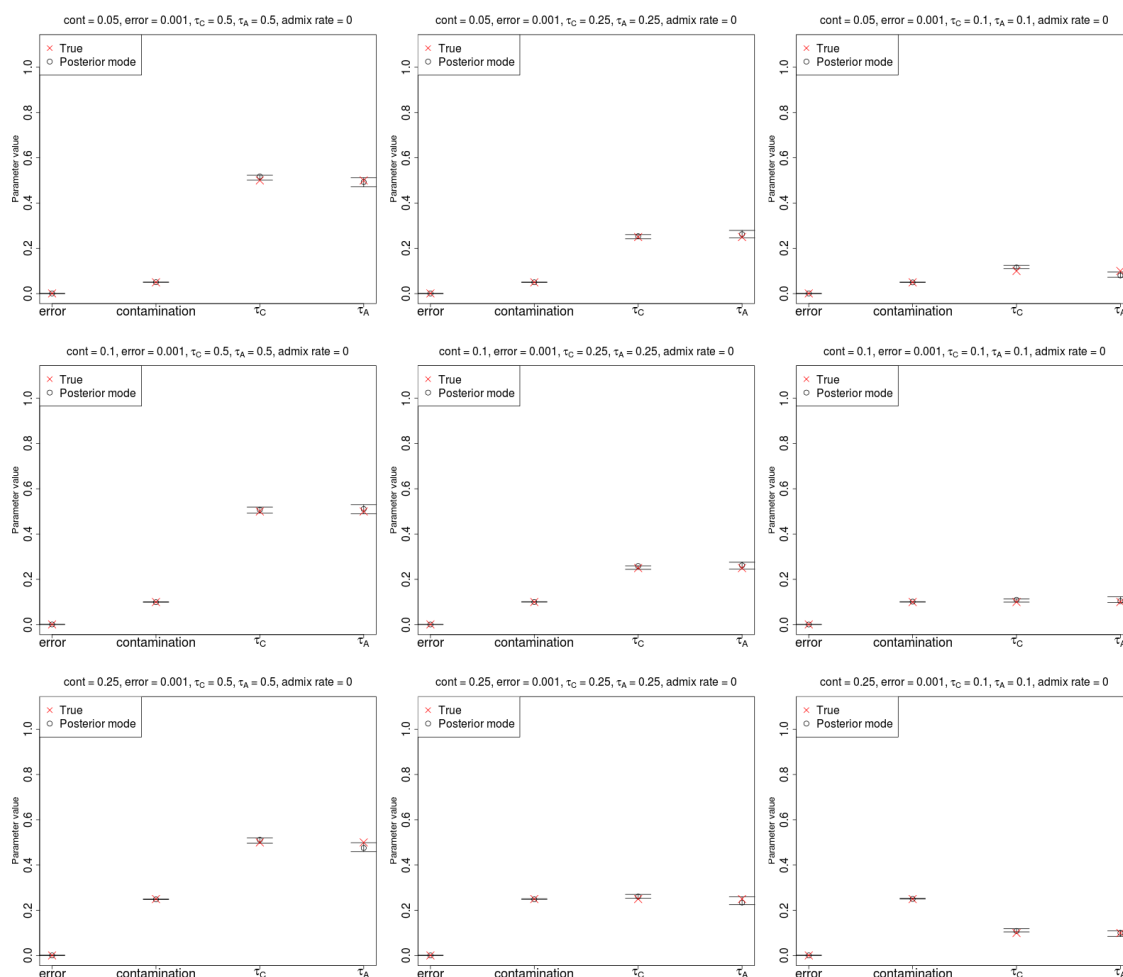

**Figure 4.** Estimation of parameters for a high-coverage ancient DNA genome (30X) with low sequencing error (0.1%), no admixture and a large anchor population panel (100 haploid genomes). Error bars represent 95% posterior intervals.

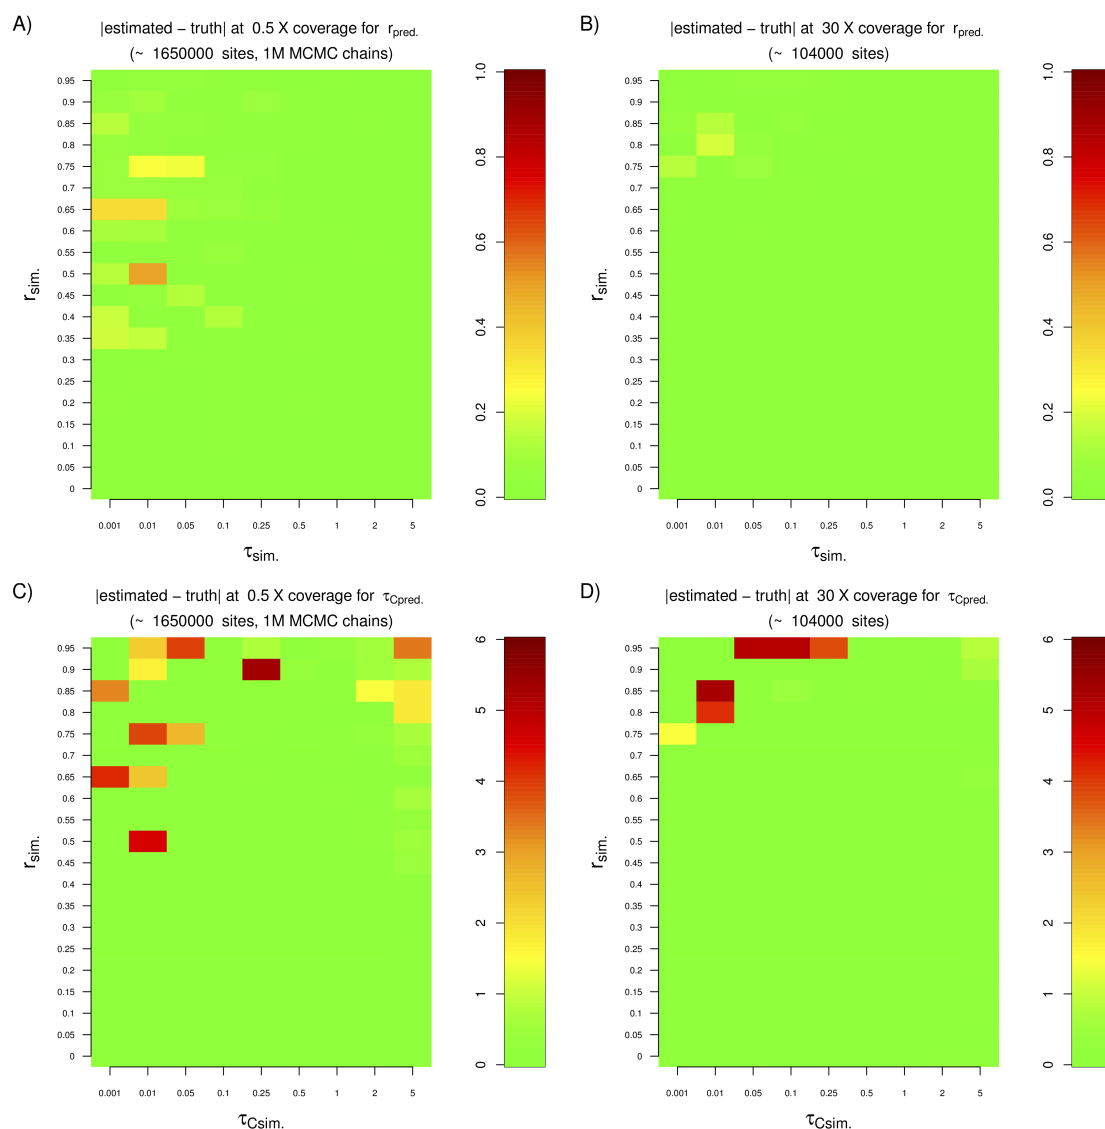

**Figure 5.** We tested the performance of the two-population method under a variety of drift and contamination scenarios for a sample of very low (0.5X) or very high (30X) coverage. We found that we needed more sites ( $\approx 1.6$  million) to obtain accurate estimates from the low coverage sample. The MCMC chain was also run for a longer time (1 million steps). The top row shows the absolute difference between the estimated and the simulated contamination rate, while the bottom row shows the absolute difference corresponding to the anchor drift. In all simulations, the anchor drift was set to be equal to the ancient sample drift.

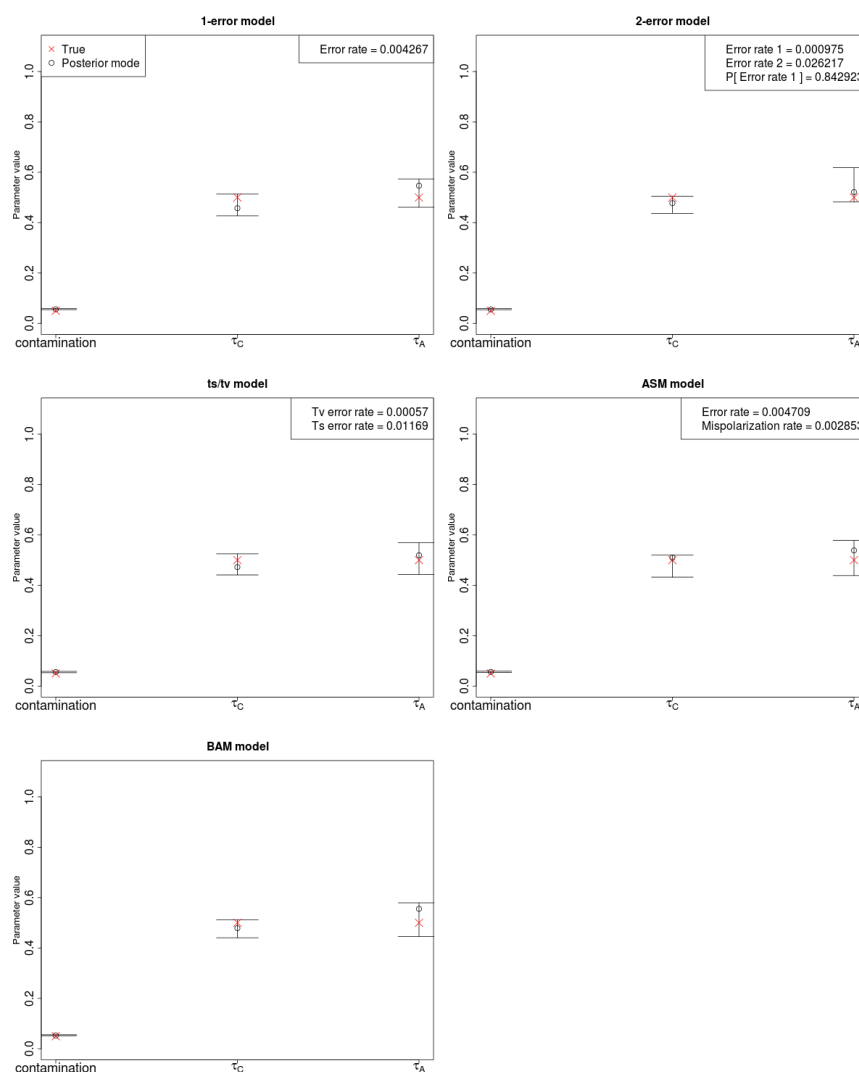

**Figure 6.** Estimation of parameters for a high-coverage ancient DNA genome (30X) simulated under a realistic scenario in which fragments from the ancient and contaminant genome were generated and then mapped to a reference genome. We allowed for multiple substitutions at the same site after the split from chimp, as well as sequencing errors and post-mortem deamination errors at the ends of the fragments. The five panels show results from inferring parameters under five different error rate models. Top-left: single-error model. Top-right: two-error model [5]. Middle-left: model with separate errors for transitions (ts) and tranversions (tv). Middle-right: single-error model with an ancestral state misidentification parameter. Bottom-left: Model in which errors were inferred individually at each site, using base and mapping qualities obtained from the simulated BAM file. Error bars represent 95% posterior intervals.

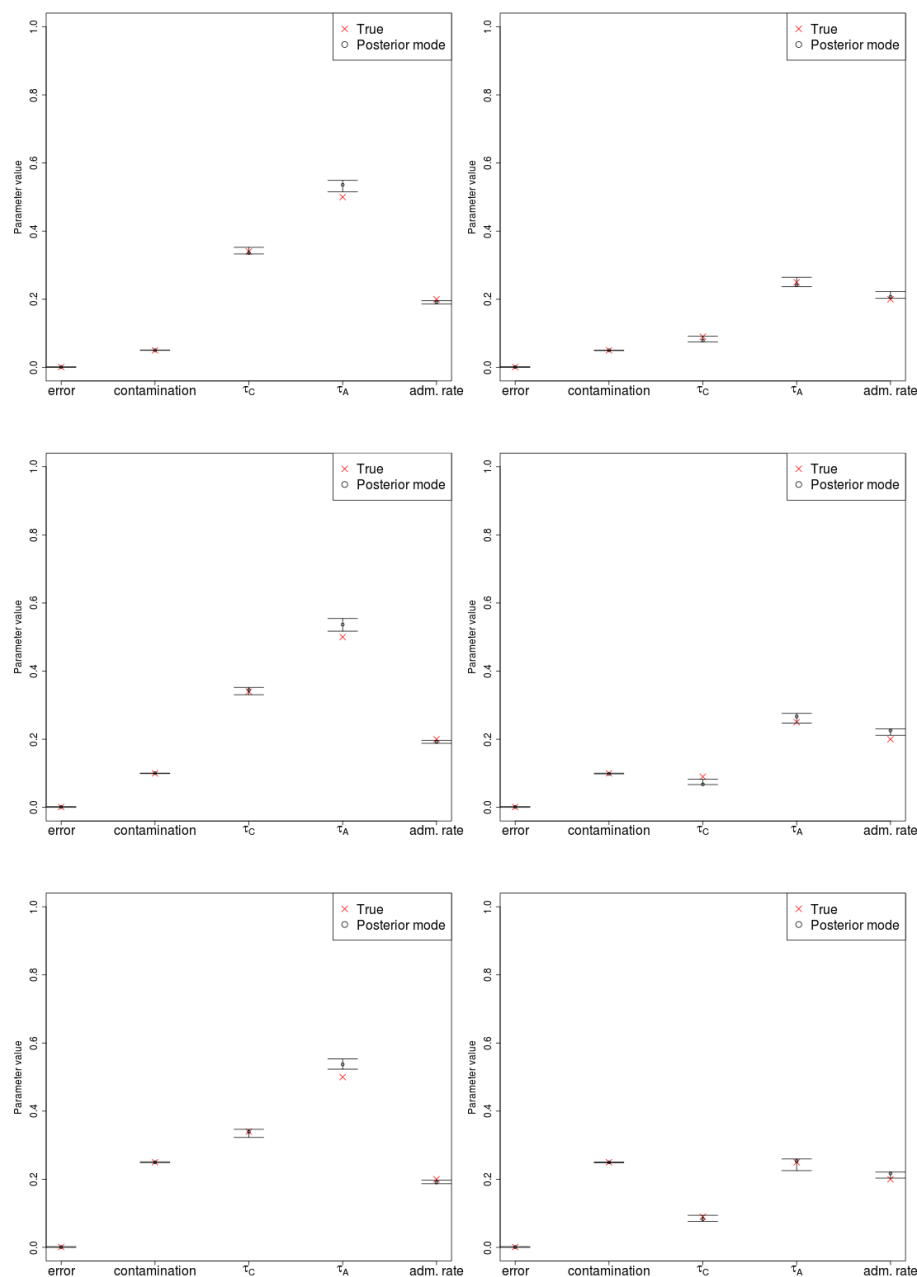

**Figure 7.** Estimation of error, contamination and demographic parameters in various three-population demographic scenarios, where the admixture rate is 20% and the admixture time was recent (0.005 drift units ago). The prior used for the admixture time was uniform over  $[0, 0.01]$ . Error bars represent 95% posterior intervals.

## 725 Supporting Information

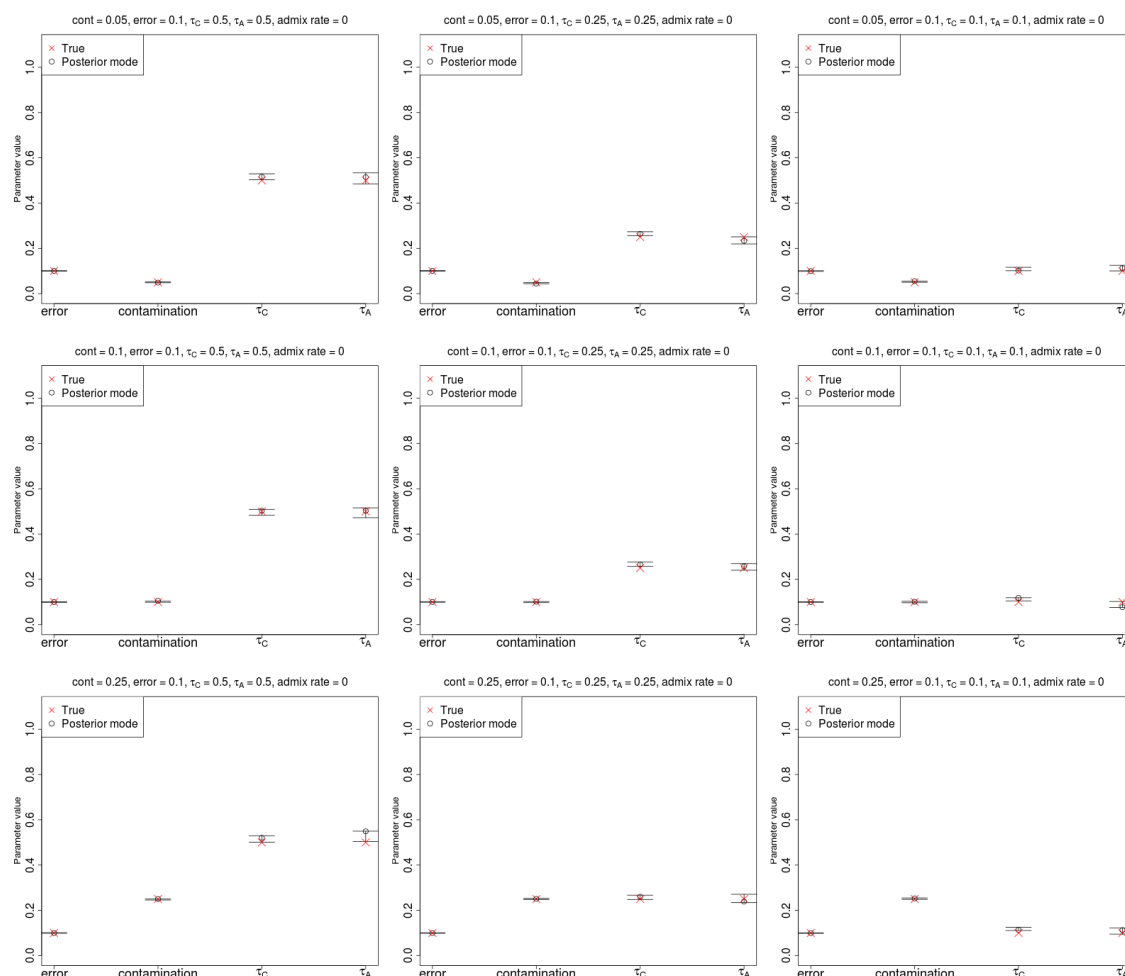

**Figure S1.** Estimation of parameters for a high-coverage ancient DNA genome (30X) with high sequencing error (10%), no admixture and a large anchor population panel (100 haploid genomes). Error bars represent 95% posterior intervals.



**Table S1.** We applied the two-population method to ancient Neanderthal and modern human genomes ranging from 52X to 0.054X coverage. We tested both shotgun-sequencing data and SNP capture data. We used AFR as both the anchor panel and the putative contaminant panel. Samples are sorted by decreasing mean coverage. We define Convergence to be true (T) if all the parameters stably converged in a region of parameter space that does not include the upper parameter boundary. Otherwise Convergence is false (F). A line separates the two Convergence classes. SNPs = number of SNPs overlapping with anchor panel. Observations = total number of base observations analyzed. SC = SNP capture. SS = shotgun sequencing. HG = hunter-gatherer. LBK = Linear Pottery culture. MN = Middle Neolithic. LN = Late Neolithic. NEA = Neanderthal. MH = Modern Human. LogPos = Log-posterior mode. Reported Cov. = Mean read coverage reported in corresponding study. For SNP capture, this is the mean coverage of the targeted SNPs.

| ID          | Study | Group | Type | Description      | Reported Cov. | SNPs    | Observations | Convergence | Error | Cont. (AFR) | $\tau_G$ (AFR) | $\tau_A$ | LogPos       |
|-------------|-------|-------|------|------------------|---------------|---------|--------------|-------------|-------|-------------|----------------|----------|--------------|
| Altai       | [4]   | NEA   | SS   | Altai Nea.       | 52            | 9500771 | 495741350    | T           | 0.11% | 0.97%       | 0.412          | 2.495    | -6574080.092 |
| Loschbour   | [29]  | MH    | SS   | Loschbour        | 22            | 8733958 | 181642481    | T           | 0.17% | 0.00%       | 0.025          | 0.634    | -5905688.289 |
| Stuttgart   | [39]  | MH    | SS   | LBK              | 19            | 8720170 | 157538109    | T           | 0.14% | 0.00%       | 0.019          | 0.392    | -5921770.389 |
| I0100       | [39]  | MH    | SC   | LBK              | 6.727         | 1017124 | 4608980      | T           | 0.09% | 0.00%       | 0.025          | 0.361    | -483569.9795 |
| I0061       | [39]  | MH    | SC   | Karelia (HG)     | 5.272         | 729066  | 3189601      | T           | 0.11% | 0.00%       | 0.026          | 0.438    | -394527.9859 |
| I0104       | [39]  | MH    | SC   | Corded Ware (LN) | 4.184         | 912245  | 2714837      | T           | 0.13% | 0.00%       | 0.022          | 0.325    | -423668.0231 |
| I0406       | [39]  | MH    | SC   | Spain (MN)       | 3.947         | 545379  | 3204204      | T           | 0.12% | 0.00%       | 0.024          | 0.367    | -341002.1352 |
| I0014       | [39]  | MH    | SC   | Motala (HG)      | 2.709         | 497524  | 2164912      | T           | 0.12% | 0.05%       | 0.031          | 0.445    | -295108.9014 |
| Kennewick   | [40]  | MH    | SS   | Kennewick        | 1.6           | 5725599 | 9648018      | T           | 0.90% | 2.13%       | 0.021          | 0.603    | -1951145.65  |
| MA-1        | [41]  | MH    | SS   | Mal'ta           | 1             | 6969896 | 13578653     | T           | 0.26% | 3.64%       | 0.026          | 0.603    | -2375835.916 |
| I0111       | [39]  | MH    | SC   | Bell Beaker (LN) | 0.731         | 300636  | 456149       | T           | 0.20% | 0.16%       | 0.033          | 0.386    | -127455.6442 |
| I0013       | [39]  | MH    | SC   | Motala (HG)      | 0.657         | 349019  | 788739       | T           | 0.24% | 2.20%       | 0.033          | 0.464    | -179713.5404 |
| Mezmaiskaya | [4]   | NEA   | SS   | Mezmaiskaya Nea. | 0.48          | 4896677 | 6811727      | T           | 0.52% | 0.01%       | 0.406          | 1.756    | -889165.6704 |
| I0439       | [39]  | MH    | SC   | Yamnaya          | 0.26          | 176088  | 194152       | F           | 0.28% | 15.60%      | 0.04           | 3.495    | -61178.22162 |
| I0060       | [39]  | MH    | SC   | Bell Beaker (LN) | 0.105         | 67741   | 73195        | F           | 0.24% | 12.03%      | 0.045          | 3.344    | -24561.12309 |
| I0804       | [39]  | MH    | SC   | Unetice          | 0.054         | 34069   | 35522        | F           | 0.32% | 7.23%       | 0.042          | 1.566    | -11980.98331 |

**Table S2.** We applied the two-population method to ancient Neanderthal and modern human genomes ranging from 52X to 0.054X coverage. We tested both shotgun-sequencing data and SNP capture data. We used AFR as the anchor panel and EUR as the putative contaminant panel. Samples are sorted by decreasing mean coverage. We define Convergence to be true (T) if all the parameters stably converged in a region of parameter space that does not include the upper parameter boundary. Otherwise Convergence is false (F). A line separates the two Convergence classes. SNPs = number of SNPs overlapping with anchor panel. Observations = total number of base observations analyzed. SC = SNP capture. SS = shotgun sequencing. HG = hunter-gatherer. LBK = Linear Pottery culture. MN = Middle Neolithic. LN = Late Neolithic. NEA = Neanderthal. MH = Modern Human. LogPos = Log-posterior mode. Reported Cov. = Mean read coverage reported in corresponding study. For SNP capture, this is the mean coverage of the targeted SNPs.

| ID          | Study | Group | Type | Description      | Reported Cov. | SNPs    | Observations | Convergence | Error | Cont. (AFR) | $\tau_C$ (AFR) | $\tau_A$ | LogPos       |
|-------------|-------|-------|------|------------------|---------------|---------|--------------|-------------|-------|-------------|----------------|----------|--------------|
| Altai       | [4]   | NEA   | SS   | Altai Nea.       | 52            | 9500771 | 495741350    | T           | 0.13% | 0.92%       | 0.455          | 2.479    | -3546071.79  |
| Loschbour   | [29]  | MH    | SS   | Loschbour        | 22            | 8733958 | 181642481    | T           | 0.17% | 0.03%       | 0.025          | 0.631    | -5905605.85  |
| Stuttgart   | [29]  | MH    | SS   | LBK              | 19            | 8720170 | 157538109    | T           | 0.14% | 0.00%       | 0.019          | 0.393    | -5921740.055 |
| I0100       | [39]  | MH    | SC   | LBK              | 6.727         | 1017124 | 4608980      | T           | 0.05% | 1.00%       | 0.025          | 0.382    | -482622.2504 |
| I0061       | [39]  | MH    | SC   | Karelia (HG)     | 5.272         | 729066  | 3189601      | T           | 0.06% | 1.69%       | 0.027          | 0.472    | -393315.7875 |
| I0104       | [39]  | MH    | SC   | Corded Ware (LN) | 4.184         | 912245  | 2714837      | T           | 0.03% | 14.75%      | 0.027          | 0.685    | -416006.3196 |
| I0406       | [39]  | MH    | SC   | Spain (MN)       | 3.947         | 545379  | 3204204      | T           | 0.08% | 0.98%       | 0.025          | 0.387    | -340329.3866 |
| I0014       | [39]  | MH    | SC   | Motala (HG)      | 2.709         | 497524  | 2164912      | T           | 0.05% | 3.45%       | 0.033          | 0.542    | -293020.4266 |
| Kennewick   | [40]  | MH    | SS   | Kennewick        | 1.6           | 5725599 | 9648018      | F           | 0.53% | 45.42%      | 0.031          | 4.999    | -1800135.257 |
| MA-1        | [41]  | MH    | SS   | Mal'ta           | 1             | 6969896 | 13578653     | F           | 0.06% | 43.76%      | 0.04           | 5        | -2133722.285 |
| I0111       | [39]  | MH    | SC   | Bell Beaker (LN) | 0.731         | 300636  | 456149       | F           | 0.00% | 50.00%      | 0.068          | 4.999    | -109596.2711 |
| I0013       | [39]  | MH    | SC   | Motala (HG)      | 0.657         | 349019  | 788739       | F           | 0.01% | 39.06%      | 0.051          | 4.965    | -161692.482  |
| Mezmaiskaya | [4]   | NEA   | SS   | Mezmaiskaya Nea. | 0.48          | 4896677 | 6811727      | F           | 0.30% | 5.57%       | 0.425          | 4.984    | -883632.4637 |
| I0439       | [39]  | MH    | SC   | Yamnaya          | 0.26          | 176088  | 194152       | F           | 0.00% | 50.00%      | 0.086          | 3.731    | -50398.43106 |
| I0060       | [39]  | MH    | SC   | Bell Beaker (LN) | 0.105         | 67741   | 73195        | F           | 0.00% | 49.97%      | 0.113          | 3.685    | -20210.34403 |
| I0804       | [39]  | MH    | SC   | Unetice          | 0.054         | 34069   | 35522        | F           | 0.00% | 50.00%      | 0.08           | 4.636    | -9780.085474 |

**Table S3.** Posterior modes of parameter estimates under the two-population inference framework for the Mezmaiskaya Neanderthal autosomal genome. We used different 1000G populations as candidate contaminants. AFR were the anchor population in all cases, so the modern human drift is with respect to Africans. Values in parentheses are 95% posterior quantiles. Except when using AFR as the contaminant, the Neanderthal drift parameter gets stuck at the upper boundary (5 drift units) of parameter space.

| Contaminant panel | Anchor panel | Error rate                  | Contamination rate          | Modern human drift       | Neanderthal drift        | Log-posterior mode |
|-------------------|--------------|-----------------------------|-----------------------------|--------------------------|--------------------------|--------------------|
| EUR               | AFR          | 0.295%<br>(0.284% – 0.306%) | 5.568%<br>(5.472% – 5.673%) | 0.425<br>(0.423 – 0.429) | 4.984<br>(4.95 – 5)      | -883632.4637       |
| AMR               | AFR          | 0.316%<br>(0.3% – 0.322%)   | 5.333%<br>(5.261% – 5.48%)  | 0.426<br>(0.422 – 0.428) | 4.994<br>(4.952 – 4.999) | -884312.5366       |
| SAS               | AFR          | 0.328%<br>(0.317% – 0.341%) | 5.203%<br>(5.097% – 5.313%) | 0.426<br>(0.422 – 0.428) | 4.996<br>(4.946 – 4.999) | -884684.3521       |
| EAS               | AFR          | 0.393%<br>(0.379% – 0.402%) | 4.53%<br>(4.48% – 4.684%)   | 0.423<br>(0.421 – 0.426) | 4.99<br>(4.887 – 4.999)  | -885493.7081       |
| AFR               | AFR          | 0.515%<br>(0.5% – 0.525%)   | 0.007%<br>(0.002% – 0.126%) | 0.406<br>(0.403 – 0.409) | 1.756<br>(1.701 – 1.774) | -889165.6704       |

**Table S4.** Posterior modes of parameter estimates under the three-population inference framework for the Mezmaiskaya Neanderthal autosomal genome. We used different 1000G populations as candidate contaminants. In all cases, Africans were the unadmixed anchor population and Europeans were the admixed anchor population. The ancestral human drift refers to the drift in the modern human branch before the split of Europeans and Africans. The post-split European-specific and African-specific drifts were estimated separately without the archaic genome ( $\tau_{Afr} = 0.009$ ,  $\tau_{Eur} = 0.255$ ). In all cases, the Neanderthal drift parameter gets stuck at the upper boundary (5 drift units) of parameter space.

| Contaminant panel | Unadmixed anchor panel | Admixed anchor panel | Error rate                  | Contamination rate          | Ancestral human drift    | Neanderthal drift      | Admixture rate              | Log-posterior mode |
|-------------------|------------------------|----------------------|-----------------------------|-----------------------------|--------------------------|------------------------|-----------------------------|--------------------|
| AFR               | AFR                    | EUR                  | 0.517%<br>(0.502% – 0.526%) | 4.663%<br>(4.564% – 4.787%) | 0.428<br>(0.426 – 0.432) | 4.999<br>(4.989 – 5)   | 1.609%<br>(1.585% – 1.63%)  | -1025944.516       |
| EAS               | AFR                    | EUR                  | 0.71%<br>(0.697% – 0.721%)  | 2.471%<br>(2.403% – 2.564%) | 0.415<br>(0.412 – 0.418) | 4.997<br>(4.985 – 5)   | 1.486%<br>(1.462% – 1.508%) | -1028456.347       |
| AMR               | AFR                    | EUR                  | 0.727%<br>(0.71% – 0.733%)  | 2.288%<br>(2.208% – 2.361%) | 0.414<br>(0.412 – 0.417) | 4.999<br>(4.985 – 5)   | 1.482%<br>(1.459% – 1.501%) | -1028866.312       |
| SAS               | AFR                    | EUR                  | 0.724%<br>(0.709% – 0.732%) | 2.315%<br>(2.219% – 2.375%) | 0.414<br>(0.412 – 0.418) | 4.998<br>(4.984 – 5)   | 1.479%<br>(1.458% – 1.5%)   | -1028823.568       |
| EUR               | AFR                    | EUR                  | 0.761%<br>(0.745% – 0.77%)  | 1.875%<br>(1.784% – 1.928%) | 0.413<br>(0.41 – 0.415)  | 4.998<br>(4.984 – 2.5) | 1.463%<br>(1.457% – 1.495%) | -1029429.156       |

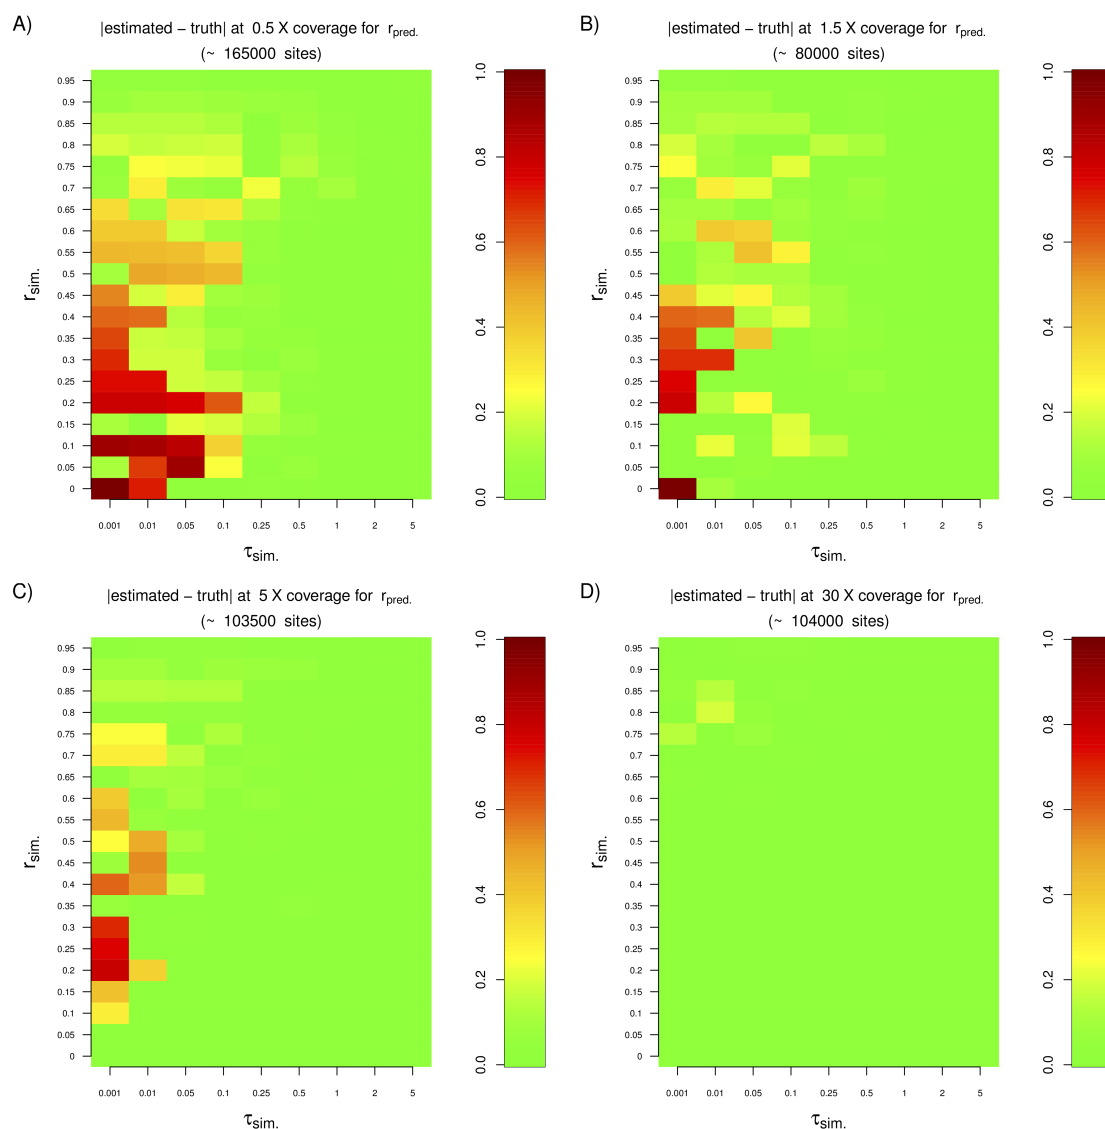

**Figure S2.** Absolute difference between estimated and simulated contamination rates for a variety of anchor drift and contamination scenarios, for different levels of coverage. In all simulations, the anchor drift was set to be equal to the ancient sample drift.

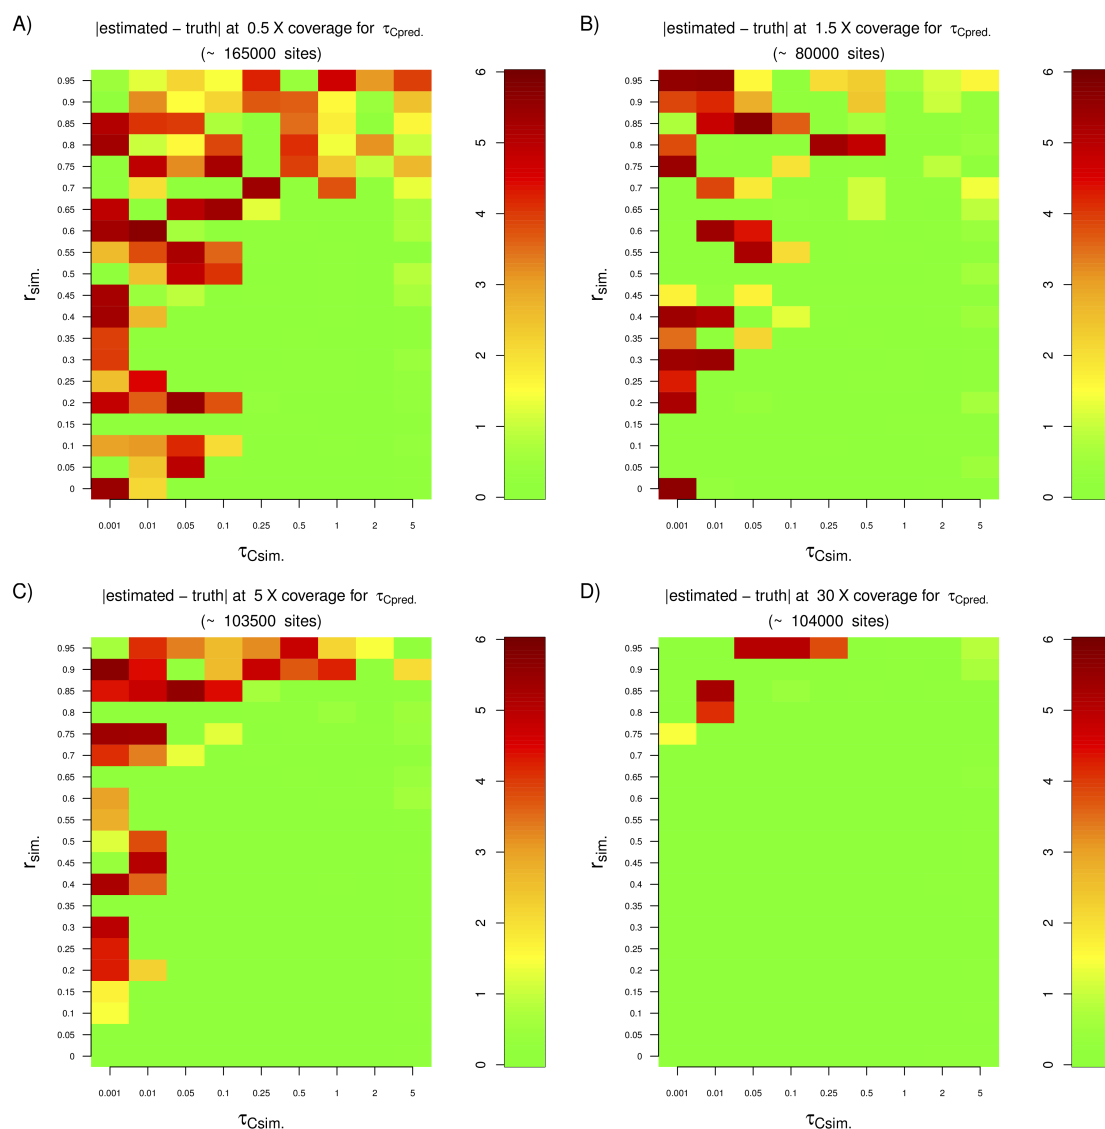

**Figure S3.** Absolute difference between estimated and simulated anchor drifts for a variety of anchor drift and contamination scenarios, for different levels of coverage. In all simulations, the anchor drift was set to be equal to the ancient sample drift.

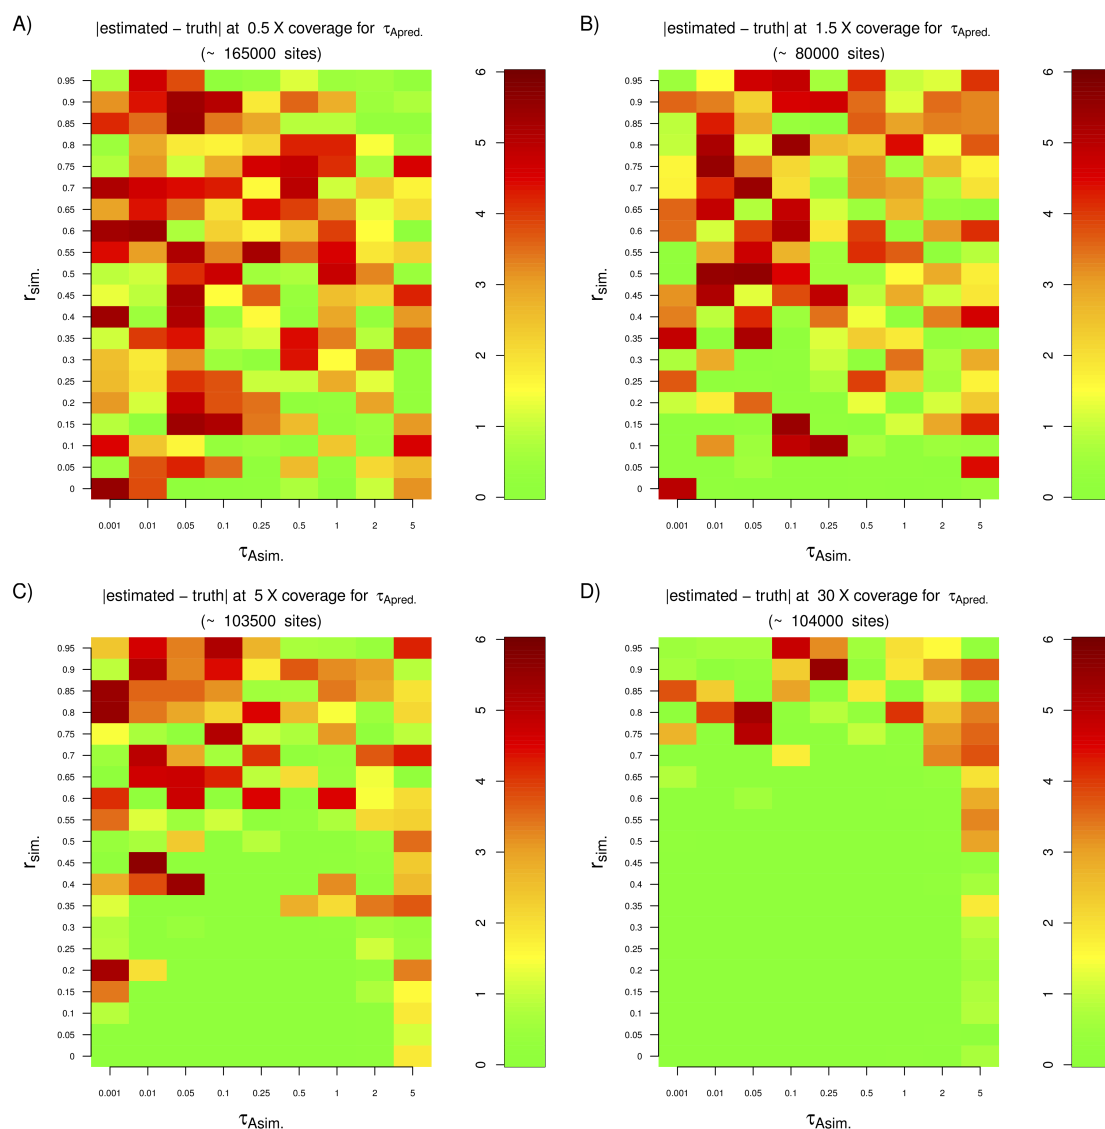

**Figure S4.** Absolute difference between estimated and simulated ancient sample drifts for a variety of anchor drift and contamination scenarios, for different levels of coverage. In all simulations, the anchor drift was set to be equal to the ancient sample drift.

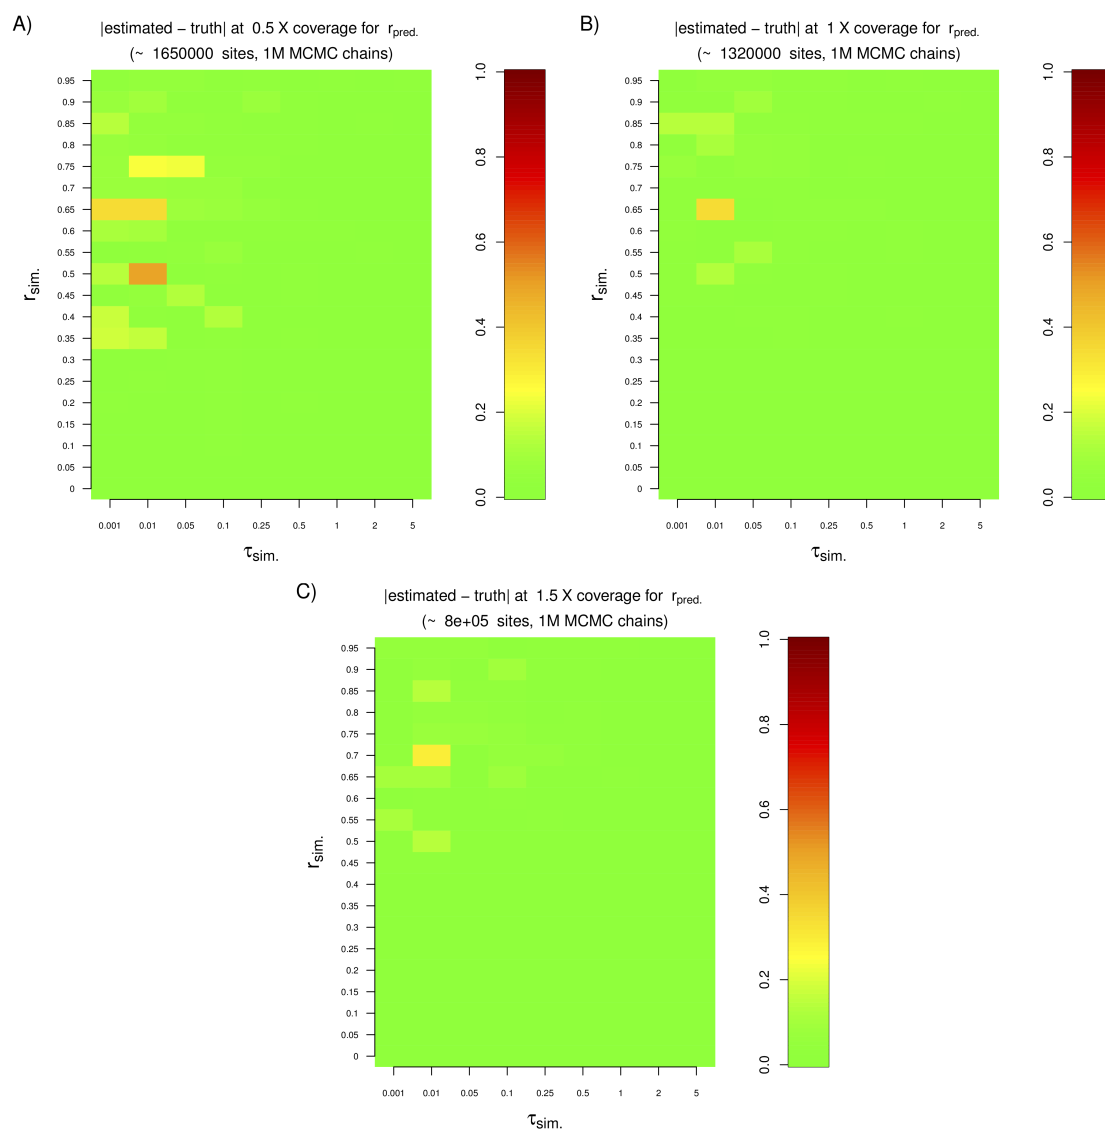

**Figure S5.** Absolute difference between estimated and simulated contamination rates for a variety of anchor drift and contamination scenarios, when coverage is low (0.5X, 1X or 1.5X). Here, we used a large number of sites and run the MCMC chain for 1 million steps. In all simulations, the anchor drift was set to be equal to the ancient sample drift.

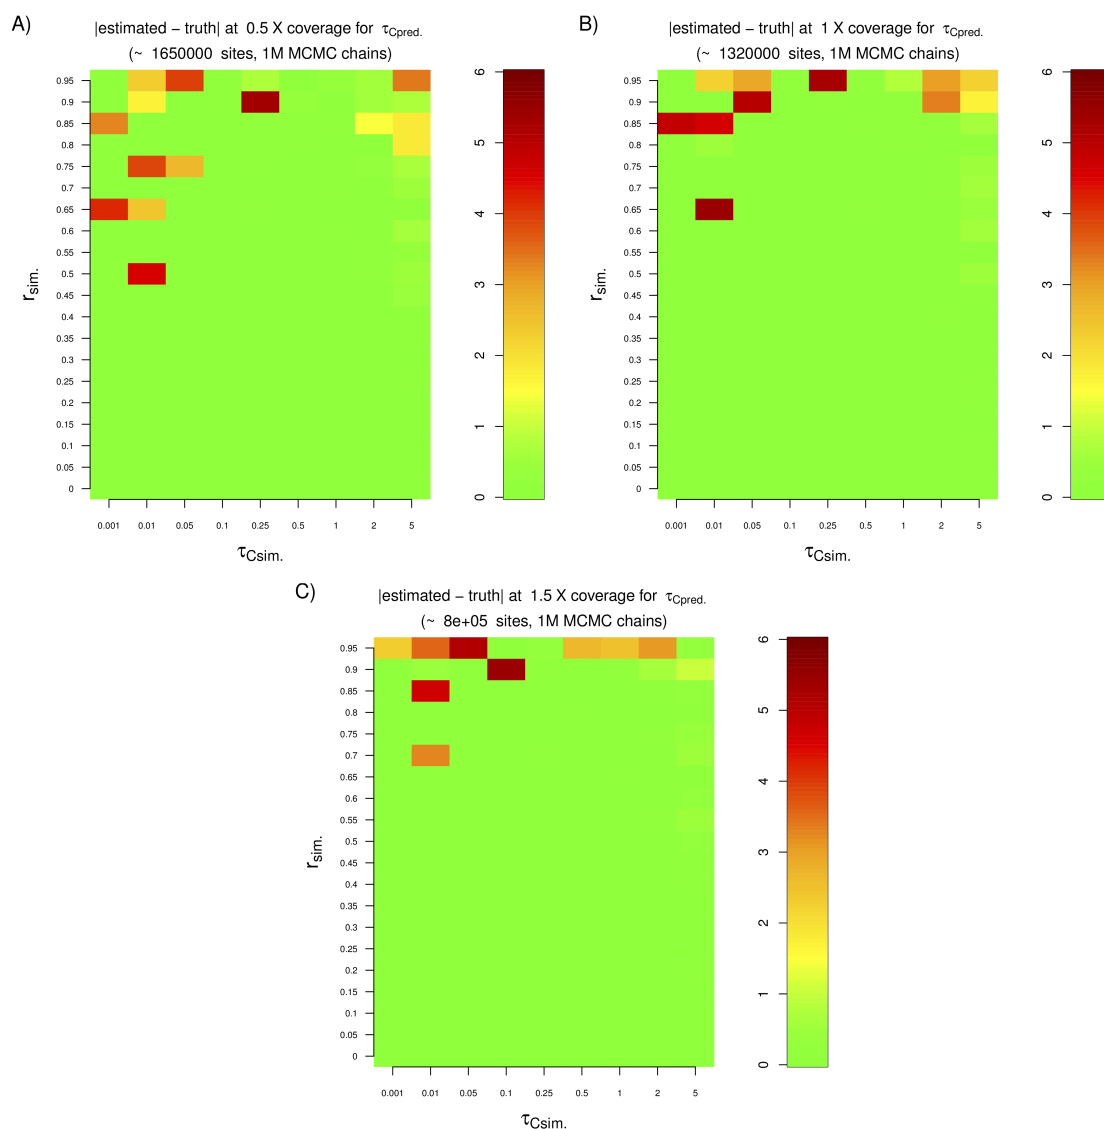

**Figure S6.** Absolute difference between estimated and simulated anchor drifts for a variety of anchor drift and contamination scenarios, when coverage is low (0.5X, 1X or 1.5X). Here, we used a large number of sites and run the MCMC chain for 1 million steps. In all simulations, the anchor drift was set to be equal to the ancient sample drift.



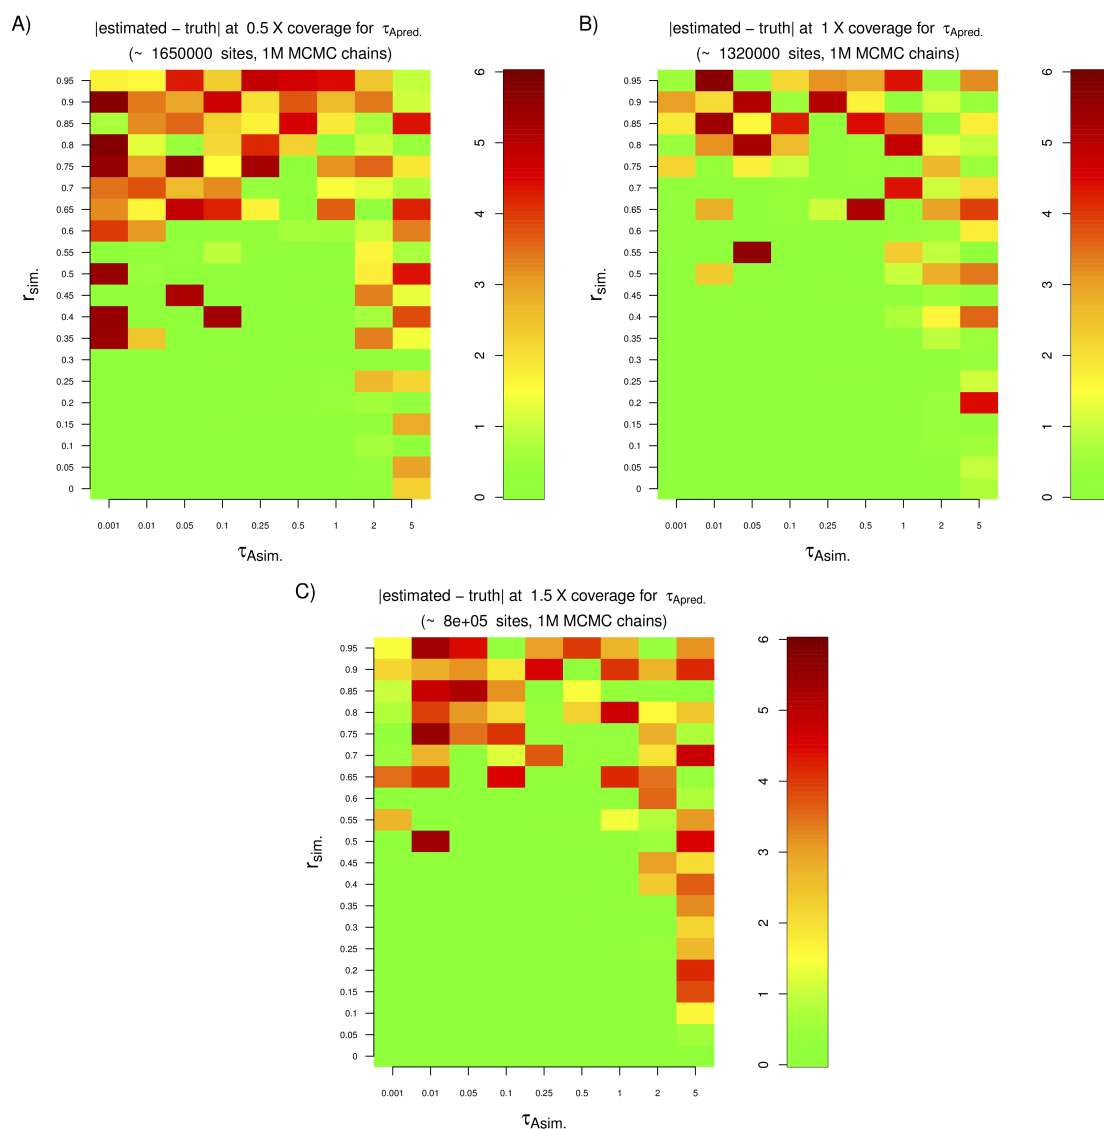

**Figure S7.** Absolute difference between estimated and simulated ancient sample drifts for a variety of anchor drift and contamination scenarios, when coverage is low (0.5X, 1X or 1.5X). Here, we used a large number of sites and run the MCMC chain for 1 million steps. In all simulations, the anchor drift was set to be equal to the ancient sample drift.

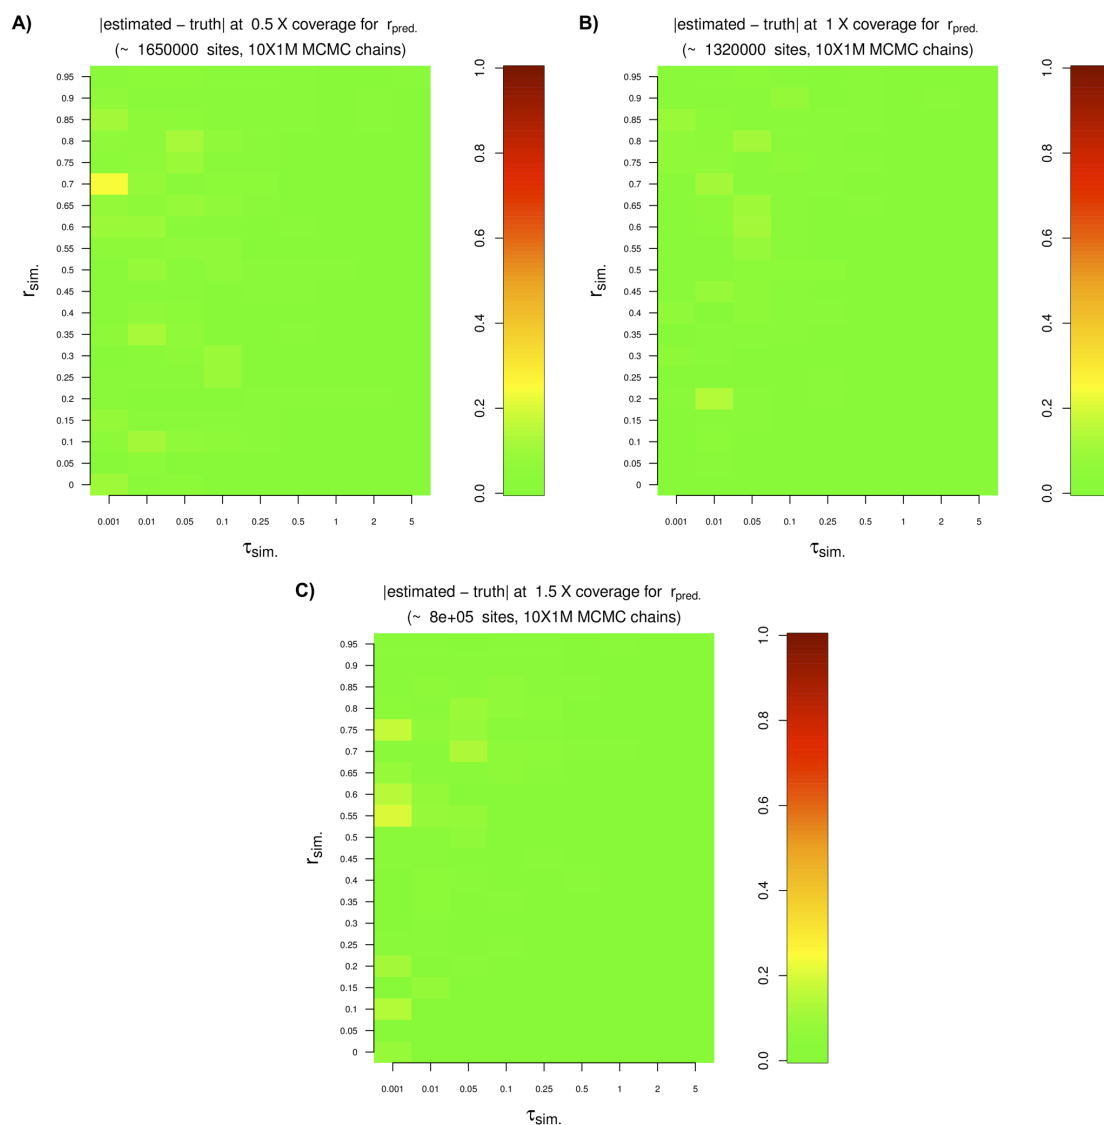

**Figure S8.** Absolute difference between estimated and simulated contamination rates for a variety of anchor drift and contamination scenarios, when coverage is low (0.5X, 1X or 1.5X). We used a large number of sites and run 10 MCMC chains for 1 million steps each. To ensure convergence, we then selected the chain with the highest posterior probability, and here show estimates from that chain. In all simulations, the anchor drift was set to be equal to the ancient sample drift

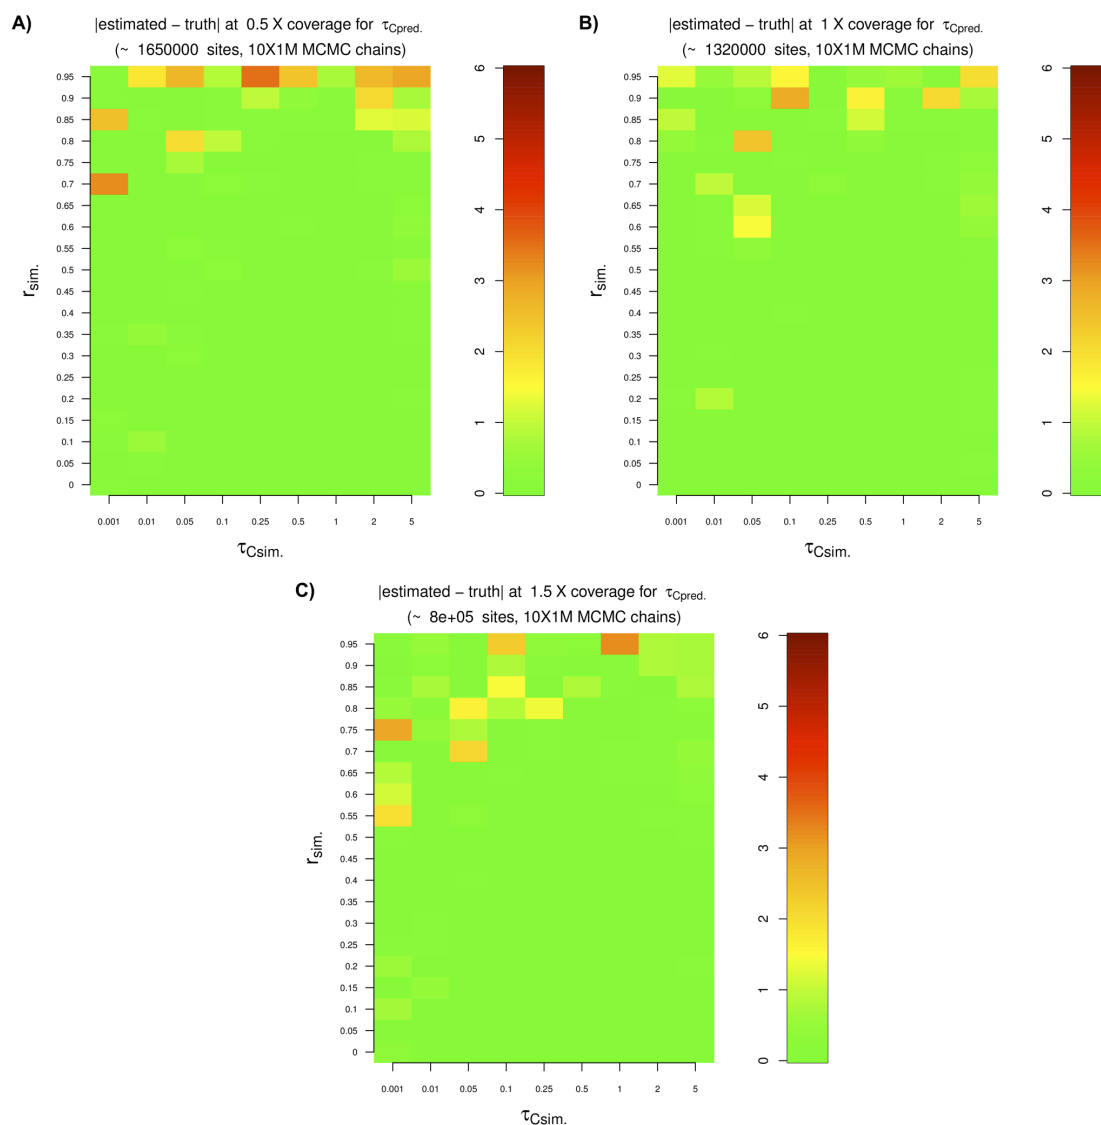

**Figure S9.** Absolute difference between estimated and simulated anchor drifts for a variety of anchor drift and contamination scenarios, when coverage is low (0.5X, 1X or 1.5X). We used a large number of sites and run 10 MCMC chains for 1 million steps each. To ensure convergence, we then selected the chain with the highest posterior probability, and here show estimates from that chain. In all simulations, the anchor drift was set to be equal to the ancient sample drift

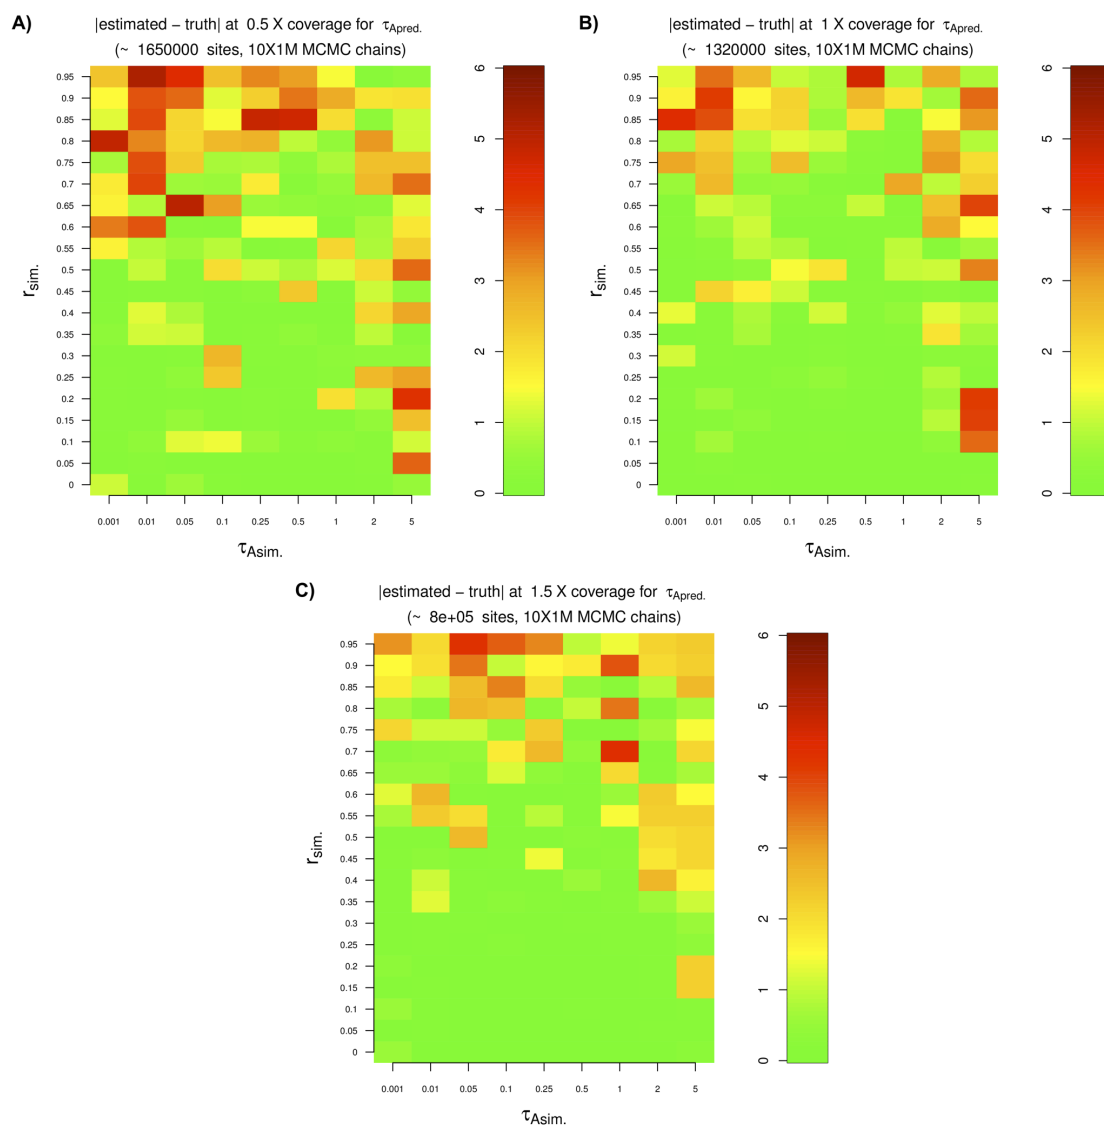

**Figure S10.** Absolute difference between estimated and simulated ancient sample drifts for a variety of anchor drift and contamination scenarios, when coverage is low (0.5X, 1X or 1.5X). We used a large number of sites and run 10 MCMC chains for 1 million steps each. To ensure convergence, we then selected the chain with the highest posterior probability, and here show estimates from that chain. In all simulations, the anchor drift was set to be equal to the ancient sample drift.

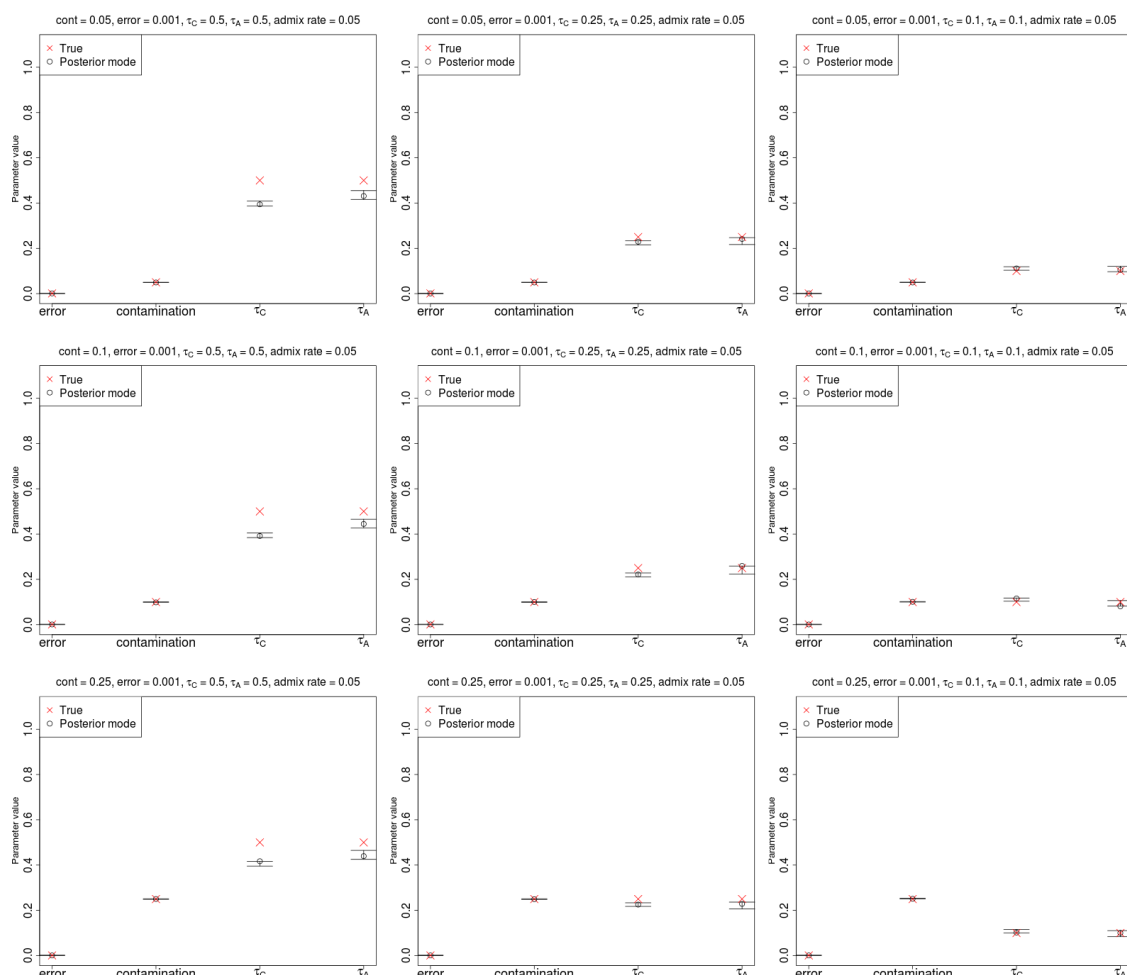

**Figure S11.** Estimation of parameters for a high-coverage ancient DNA genome (30X) with low sequencing error (0.1%), a large anchor population panel (100 haploid genomes) and admixture in the anchor population from the archaic population (5%), using the two-population inference framework, which does not model admixture. Error bars represent 95% posterior intervals.

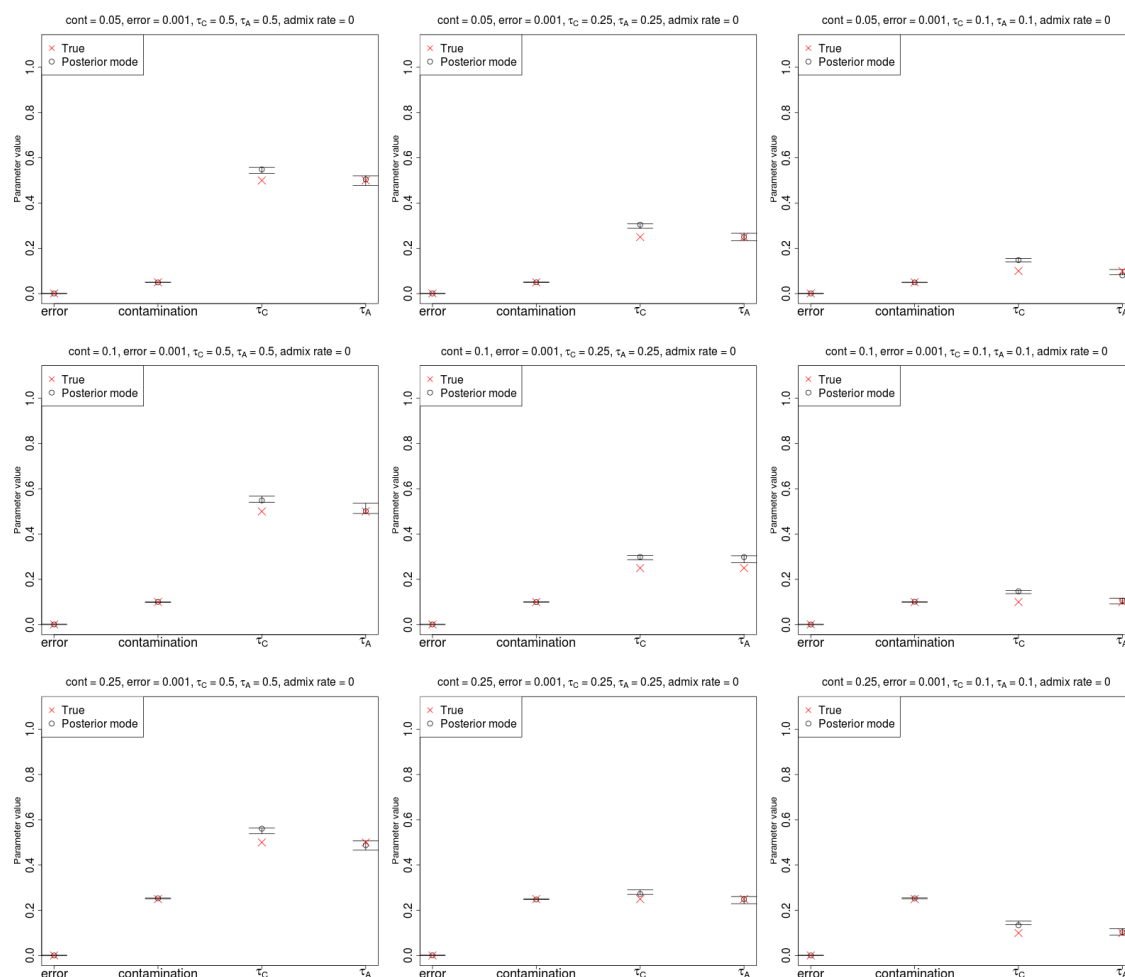

**Figure S12.** Estimation of parameters for a high-coverage ancient DNA genome (30X) with low sequencing error (0.1%), no admixture and a small anchor population panel (20 haploid genomes). Error bars represent 95% posterior intervals.

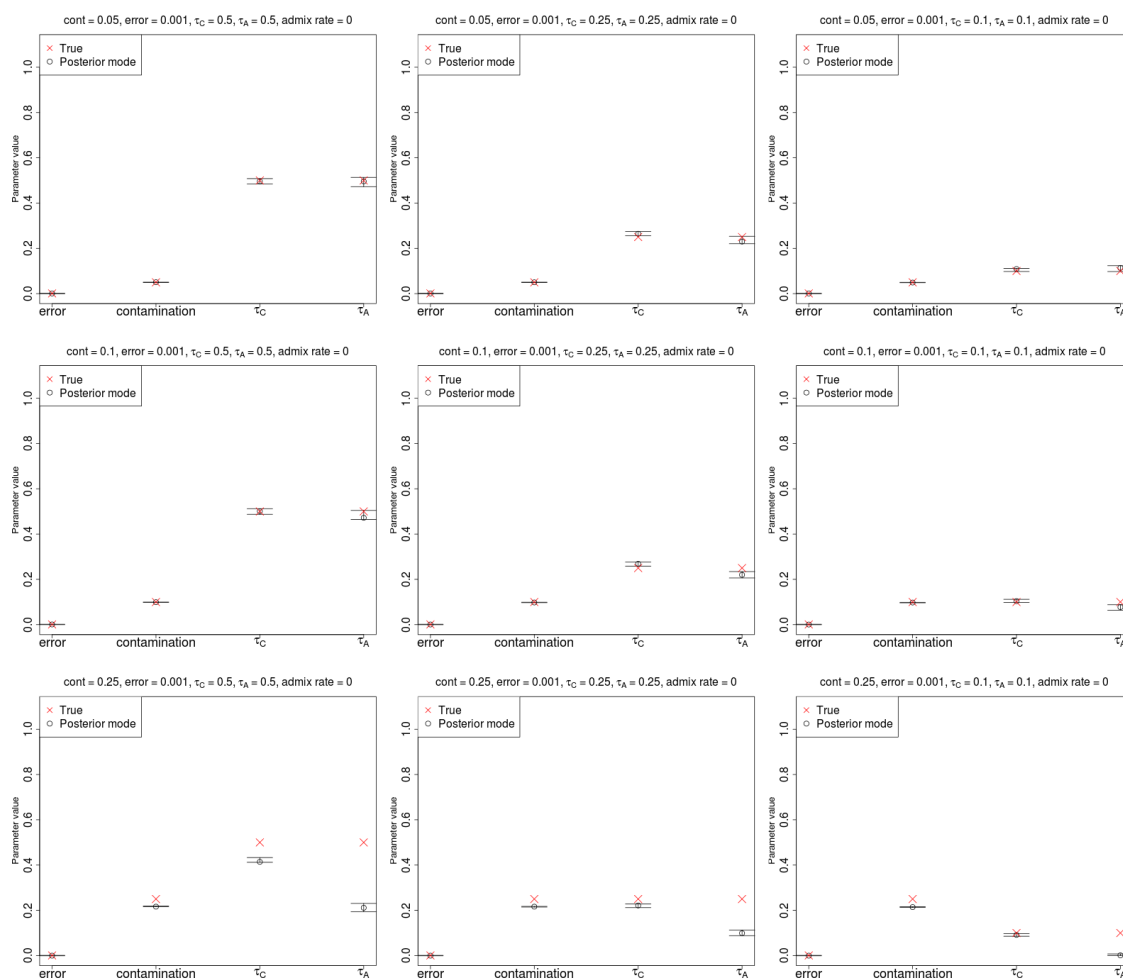

**Figure S13.** Estimation of parameters for a high-coverage ancient DNA genome (30X), when the contaminant fragments are exclusively drawn from a single diploid individual from the contaminant panel. Error bars represent 95% posterior intervals.

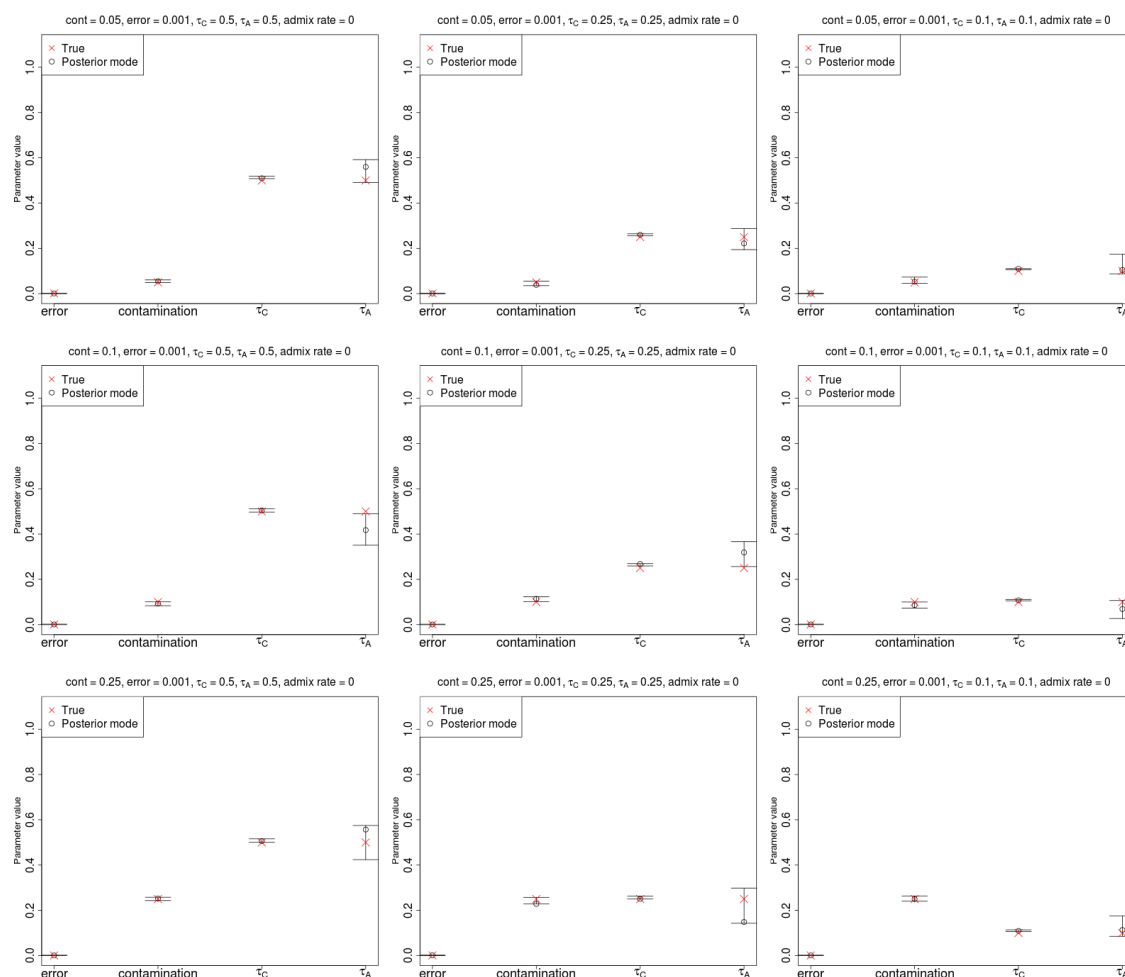

**Figure S14.** Estimation of parameters for an ancient DNA genome of very low coverage (0.5X) with low sequencing error (0.1%) and a large anchor population panel (100 haploid genomes). Note that unlike the rest of the simulations, the number of SNPs used in this case was approximately 1.6 million instead of 80,000, and the MCMC chain was run for 1 million steps instead of 100,000. Using a lower number of SNPs or running the chain for a shorter time resulted in inaccurate inferences. Error bars represent 95% posterior intervals.



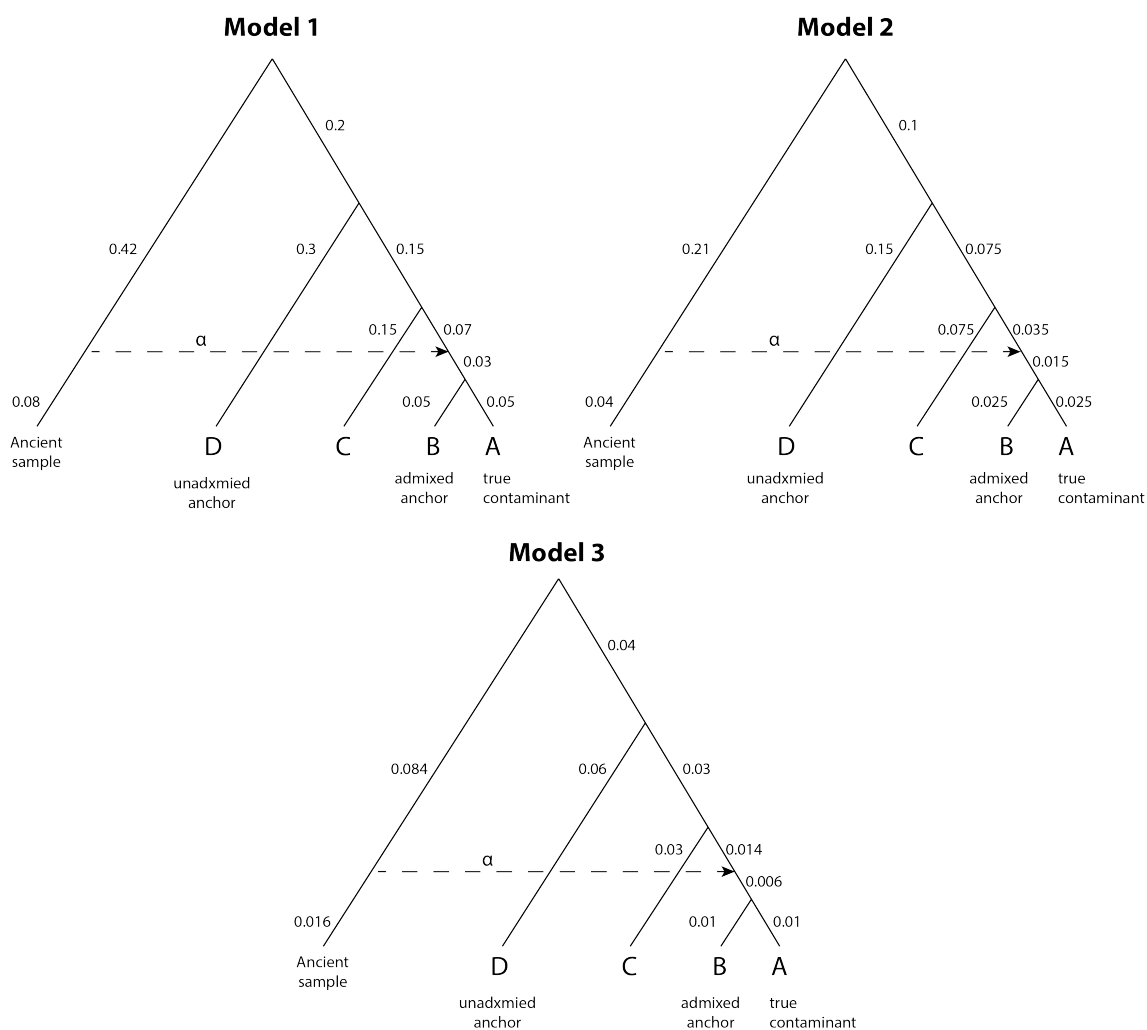

**Figure S15.** Three demographic models used to test the method when the contaminant is misspecified. When testing the two-population method, we set panel A as the true contaminant and panel D as the anchor. When testing the three-population method, we set panel A as the true contaminant, panel D as the unadmixed anchor and panel B as the admixed anchor. The numbers on the branches represent the drift parameters. The parameter  $\alpha$  represents the admixture rate from the ancient population into the ancestor of A and B.

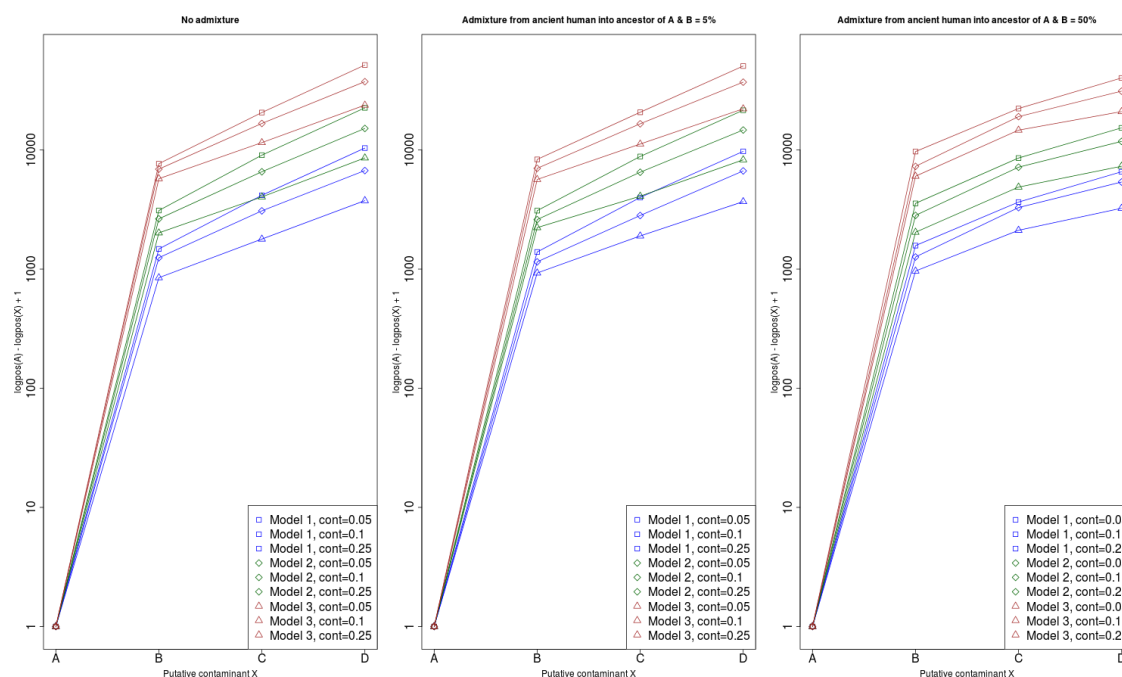

**Figure S16.** When testing different putative contaminants, the highest mode of the posterior likelihoods from the MCMC under the two-population model corresponds to the true contaminant (panel A). The y-axis shows the difference between the log-posterior for contaminant panel A and the log-posterior for different candidate contaminant panels (A, B, C, D). We added a 1 to the difference to be able to plot the difference on a logarithmic scale. The three panels contain results for three admixture scenarios (from left to right: admixture rate of 0%, 5% and 50%) and each panel shows the difference under different contamination rates and demographic models (see Figure S15).

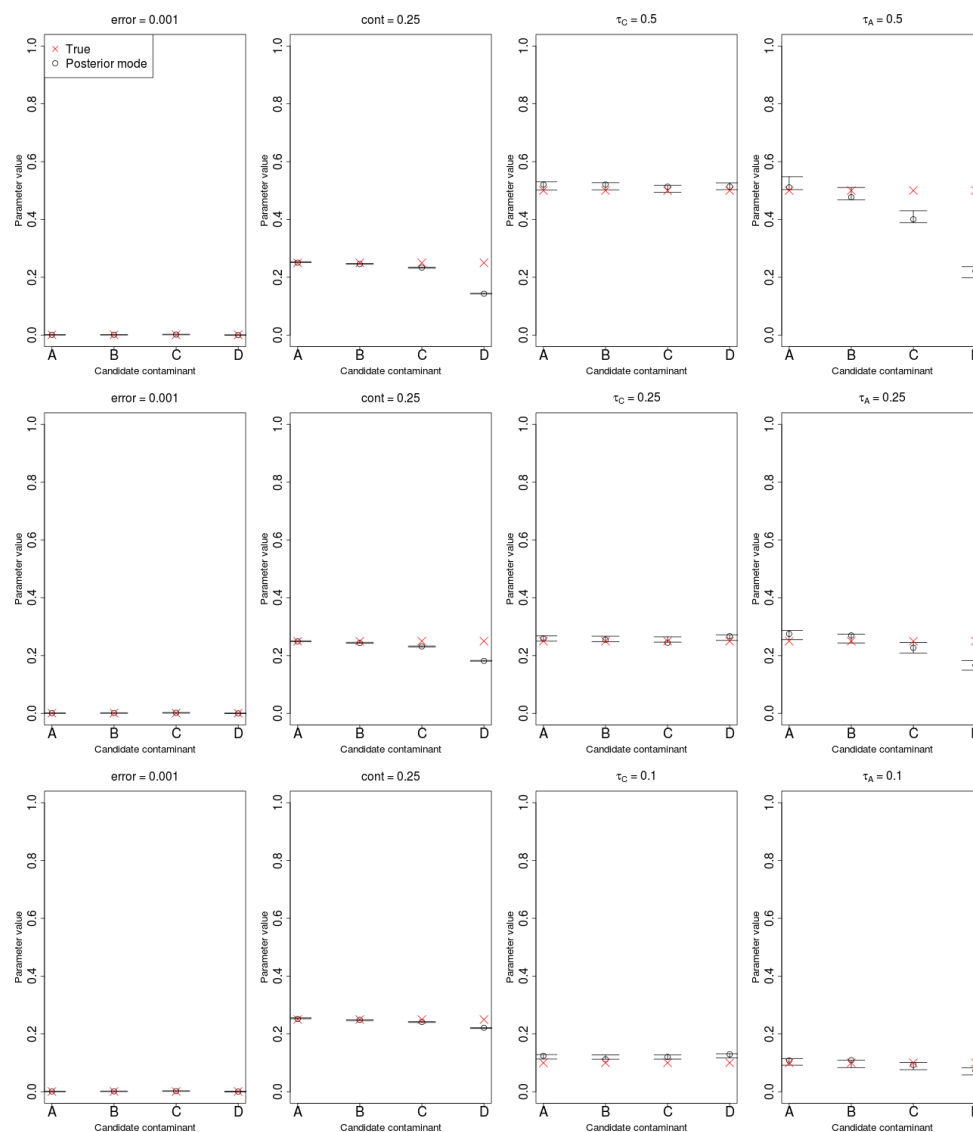

**Figure S17.** Parameters estimates under the two-population model using different putative contaminants, when the true contaminant is panel A. Each row of panels represents a different set of drift parameters, keeping the contamination rate fixed at 25% and the error rate at 0.1%. In this case, the admixture rate from the ancient population to the ancestor of A and B was kept at 0%. The anchor panel used was panel D (see Figure S15).

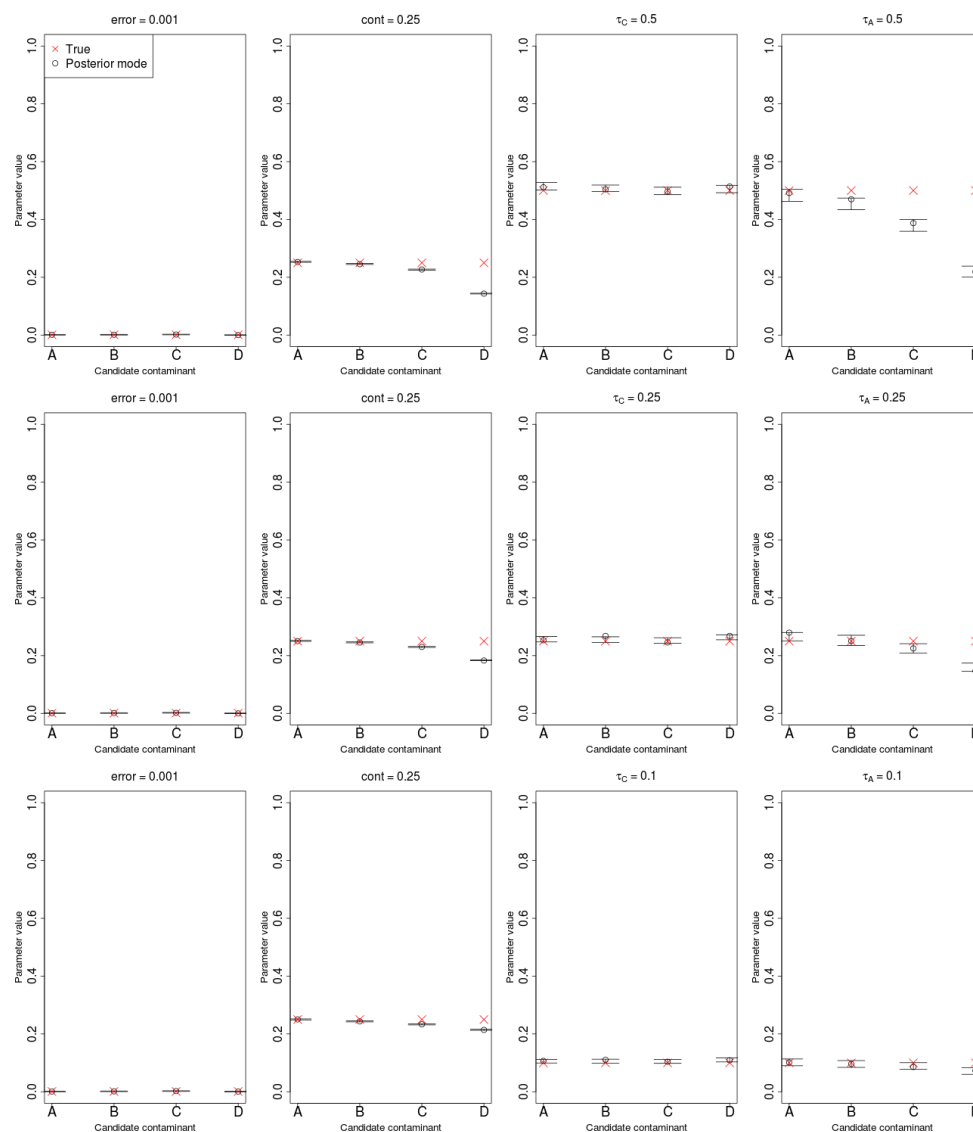

**Figure S18.** Parameters estimates under the two-population model using different putative contaminants, when the true contaminant is panel A. Each row of panels represents a different set of drift parameters, keeping the contamination rate fixed at 25% and the error rate at 0.1%. In this case, the admixture rate from the ancient population to the ancestor of A and B was kept at 5%. The anchor panel used was panel D (see Figure S15).

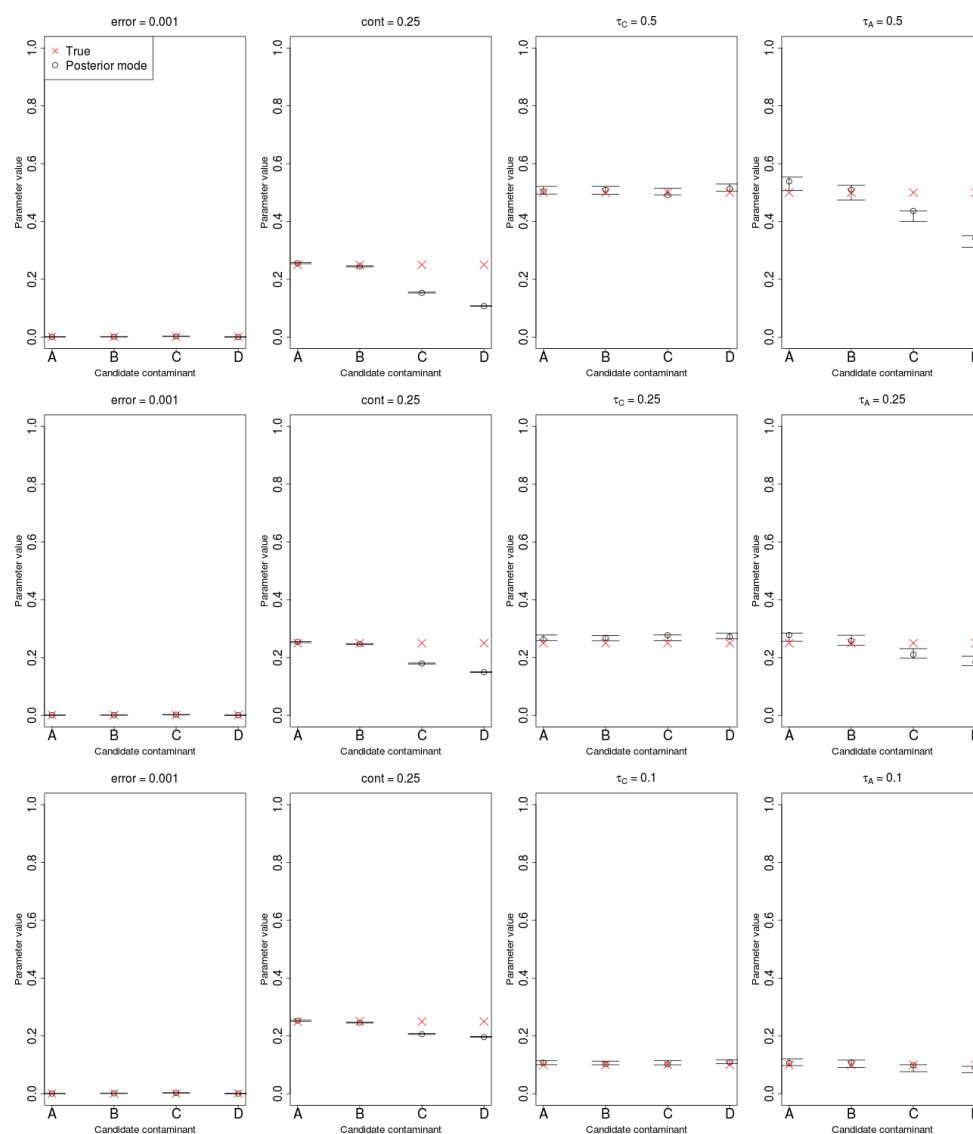

**Figure S19.** Parameters estimates under the two-population model using different putative contaminants, when the true contaminant is panel A. Each row of panels represents a different set of drift parameters, keeping the contamination rate fixed at 25% and the error rate at 0.1%. In this case, the admixture rate from the ancient population to the ancestor of A and B was kept at 50%. The anchor panel used was panel D (see Figure S15).

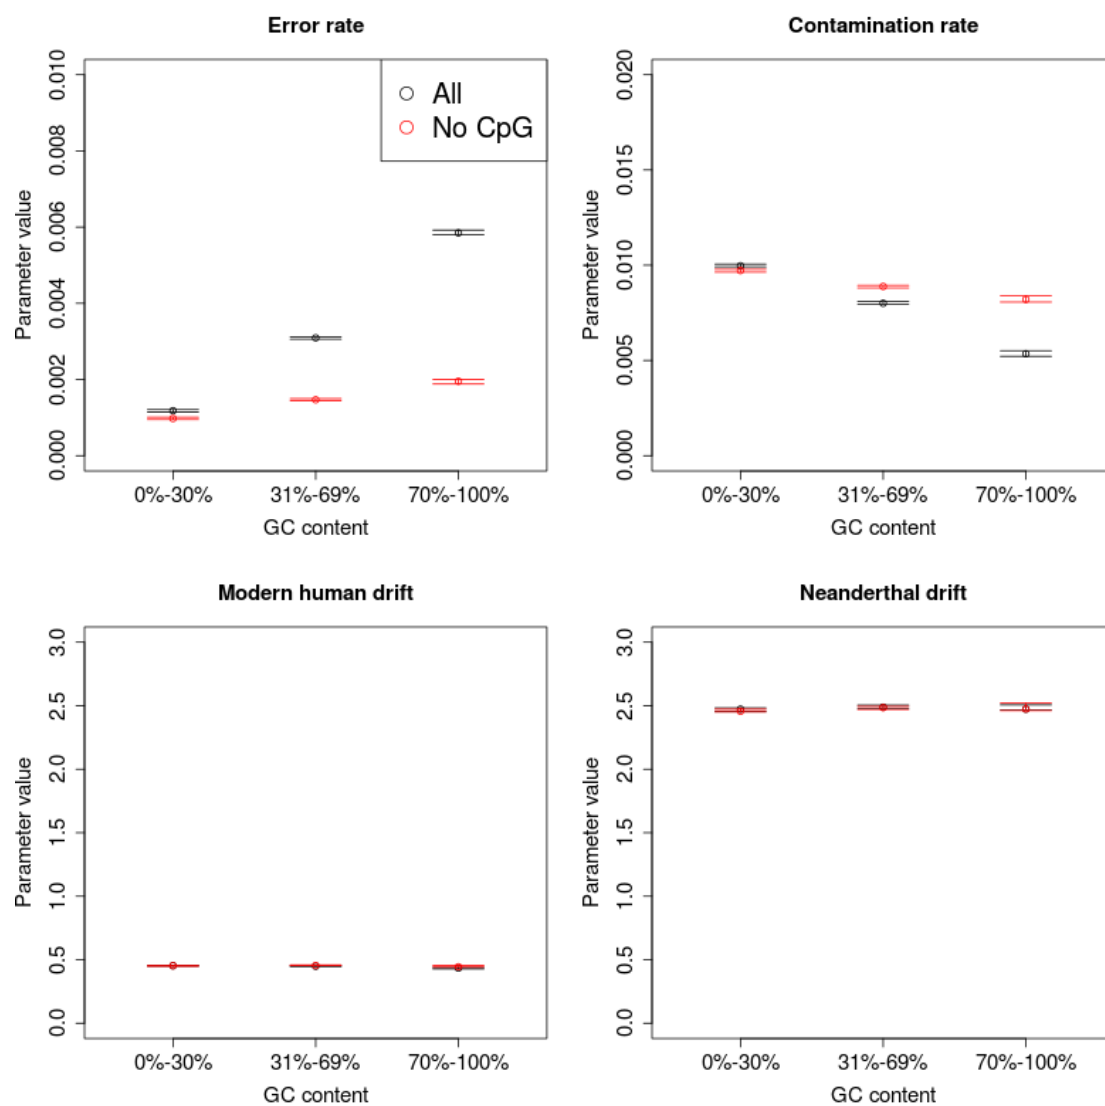

**Figure S20.** Estimation of parameters for the Altai Neanderthal genome across different GC levels using the two-population model, while keeping (black) or removing (red) CpG sites from the input dataset. Error bars represent 95% posterior intervals.

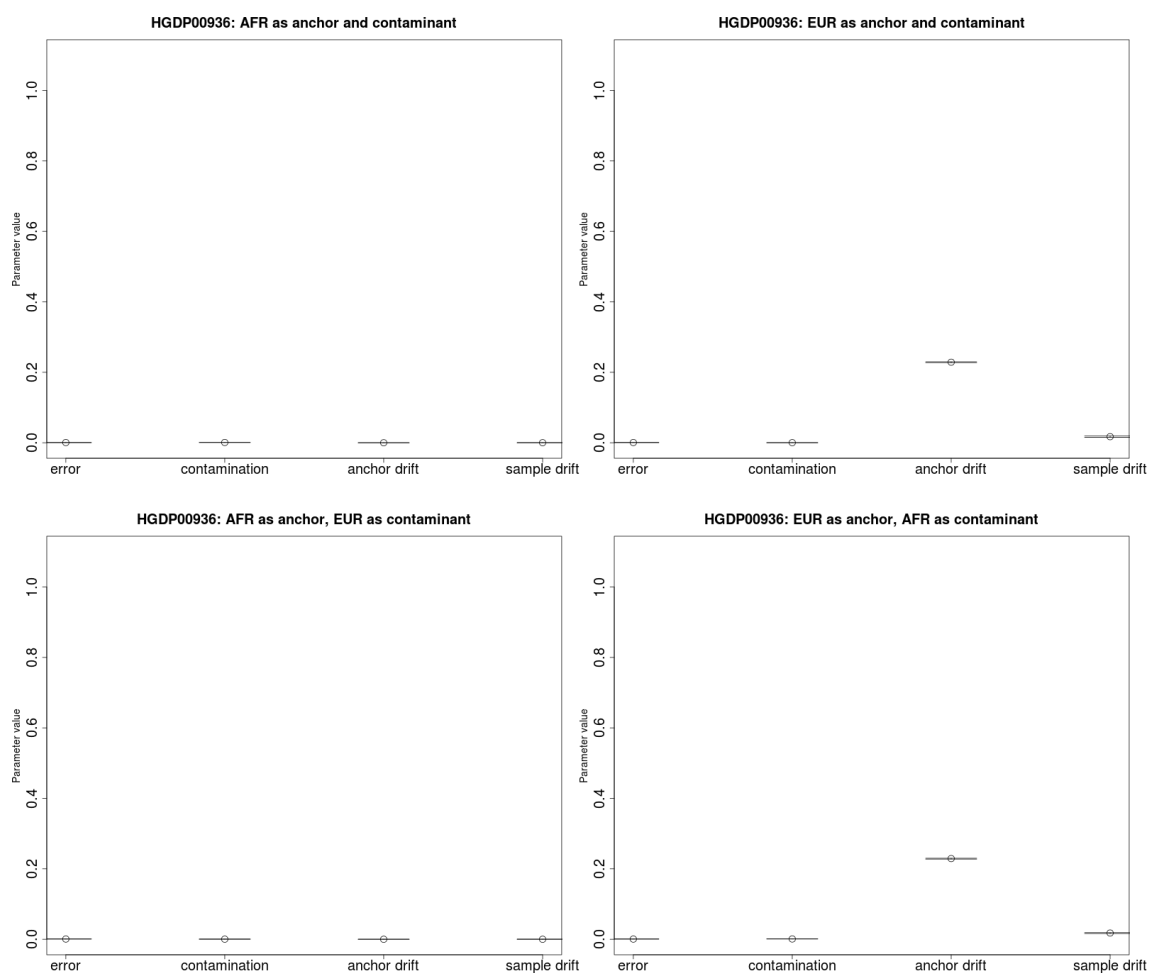

**Figure S21.** We tested one of the Yoruba genomes from Prüfer et al. [4] and obtain an estimate of 0% contamination, regardless of whether we use Europeans or Africans as the candidate contaminant. The anchor drift time is close to 0 when using Africans as the anchor population, as the sample belongs to that same population, while it is non-zero ( $= 0.22$ ) when using Europeans. Error bars represent 95% posterior intervals.

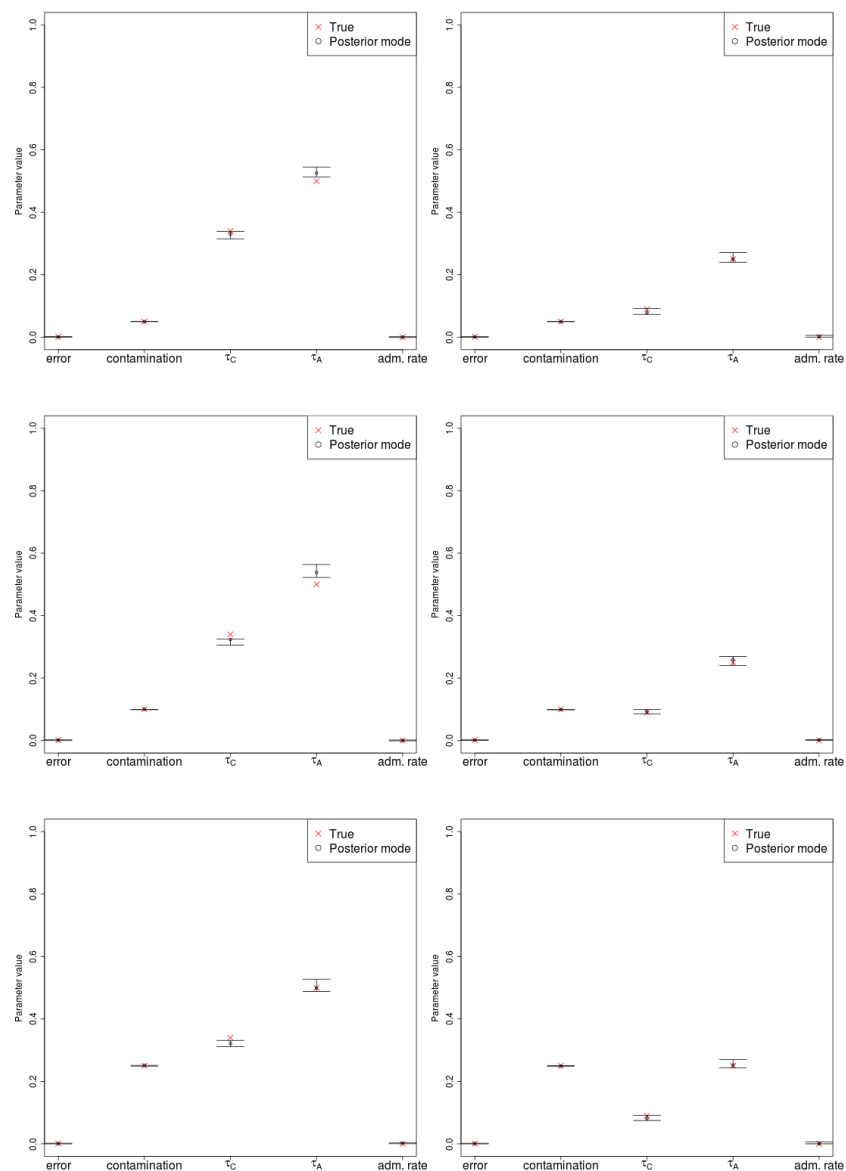

**Figure S22.** Estimation of error, contamination and demographic parameters in various three-population demographic scenarios, where the admixture rate is 0%. The prior used for the admixture time was uniform over [0.06, 0.1]. Error bars represent 95% posterior intervals.



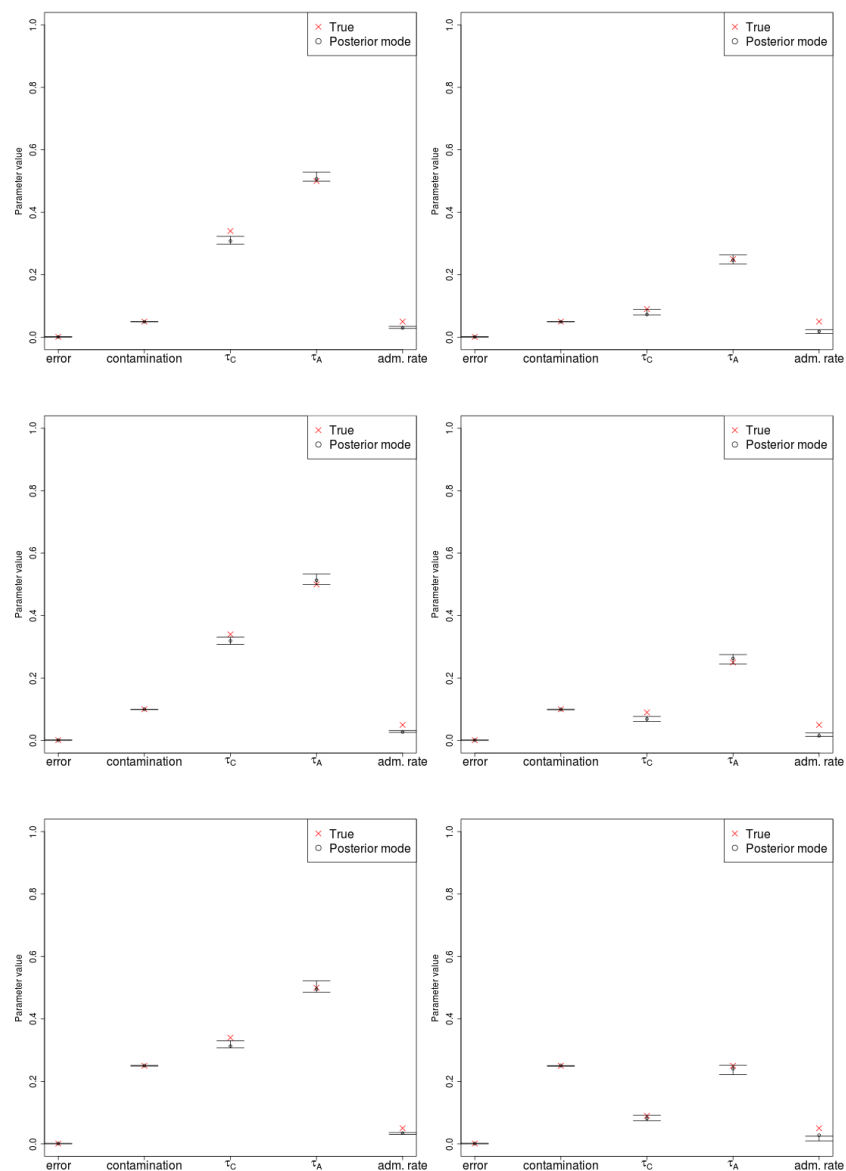

**Figure S23.** Estimation of error, contamination and demographic parameters in various three-population demographic scenarios, where the admixture rate is 5% and the admixture time is ancient (0.08 drift units ago). The prior used for the admixture time was uniform over  $[0.06, 0.1]$ . Error bars represent 95% posterior intervals.

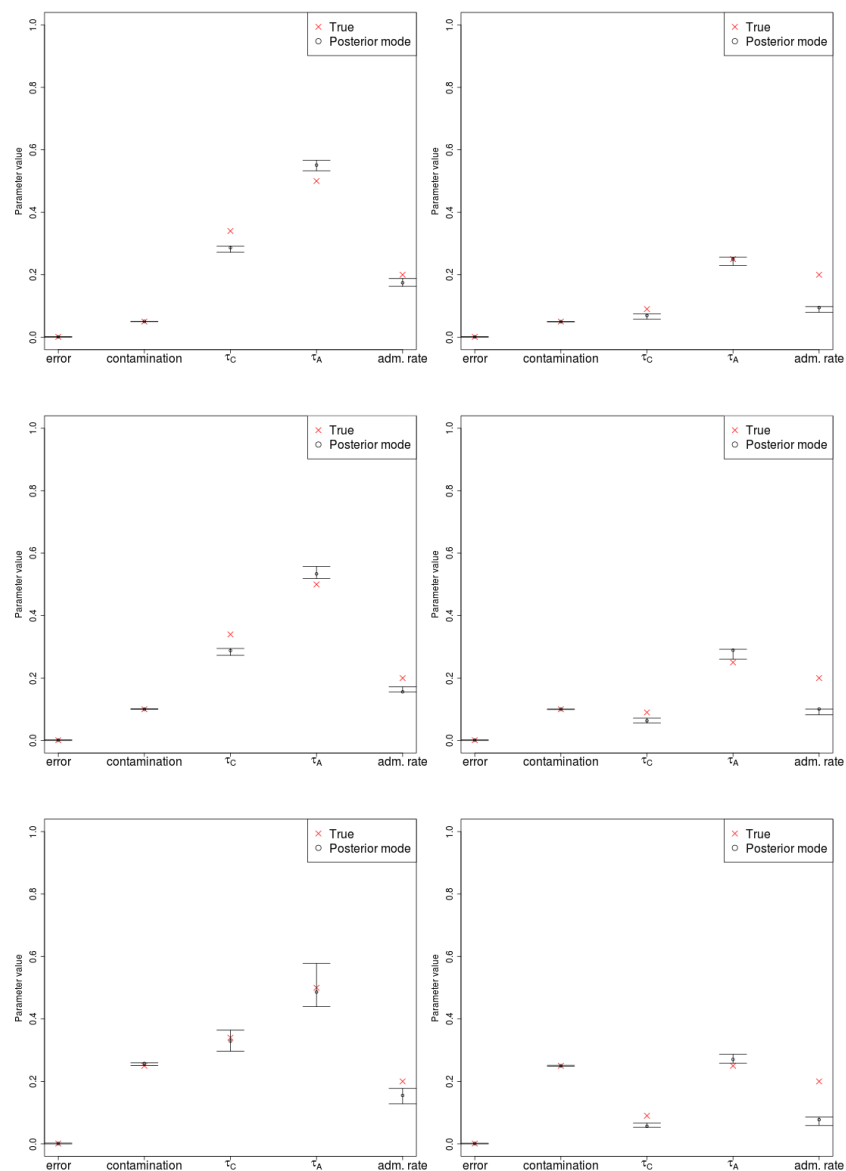

**Figure S24.** Estimation of error, contamination and demographic parameters in various three-population demographic scenarios, where the admixture rate is 20% and the admixture time is ancient (0.08 drift units ago). The prior used for the admixture time was uniform over  $[0.06, 0.1]$ . Error bars represent 95% posterior intervals.

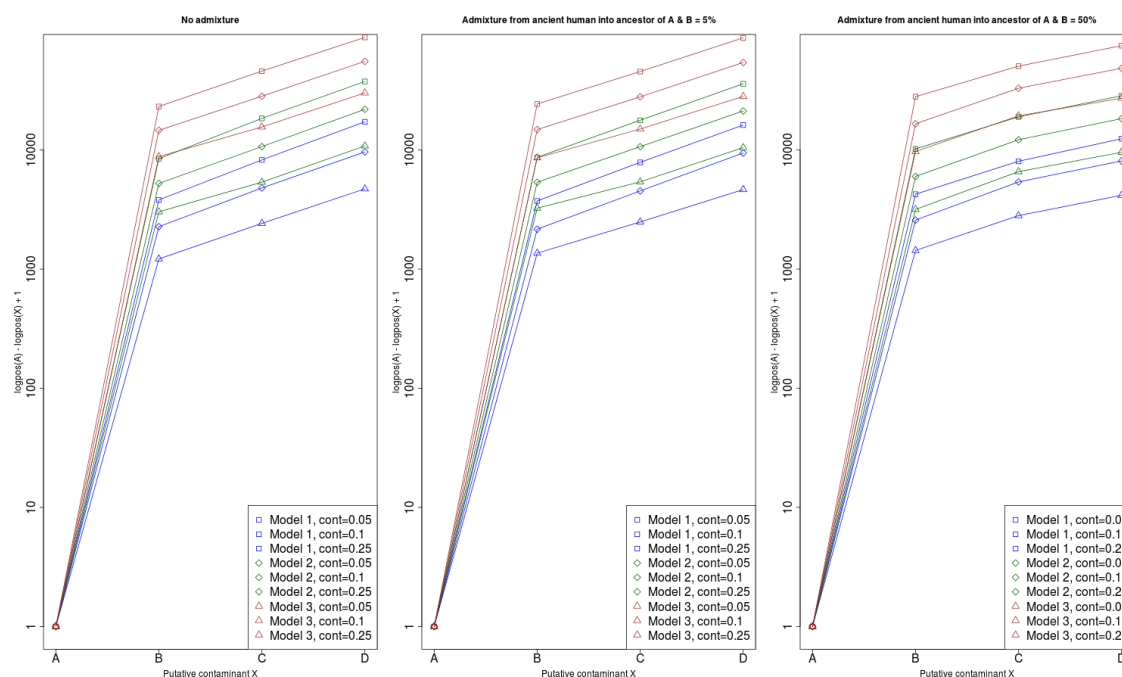

**Figure S25.** When testing different putative contaminants, the highest mode of the posterior likelihoods from the MCMC under the three-population model corresponds to the true contaminant (panel A). The y-axis shows the difference between the log-posterior for contaminant panel A and the log-posterior for different candidate contaminant panels (A, B, C, D). We added a 1 to the difference to be able to plot the difference on a logarithmic scale. The three panels contain results for three admixture scenarios (from left to right: admixture rate of 0%, 5% and 50%) and each panel shows the difference under different contamination rates and demographic models (see Figure S15).

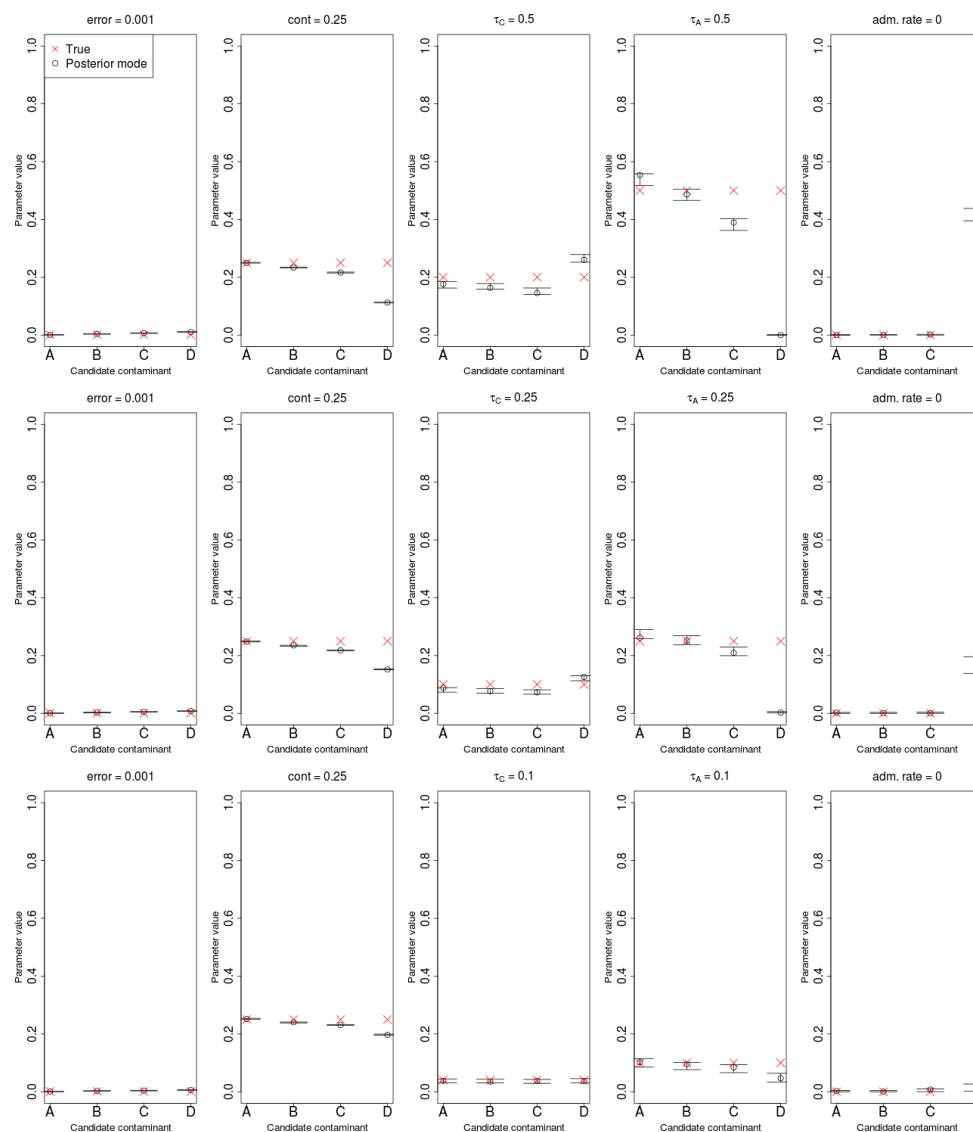

**Figure S26.** Parameters estimates under the three-population model using different putative contaminants, when the true contaminant is panel A. Each row of panels represents a different set of drift parameters, keeping the contamination rate fixed at 25% and the error rate at 0.1%. In this case, the admixture rate from the ancient population to the ancestor of A and B was kept at 0%. The unadmixed anchor panel used was panel D and the admixed anchor panel was panel B (see Figure S15).

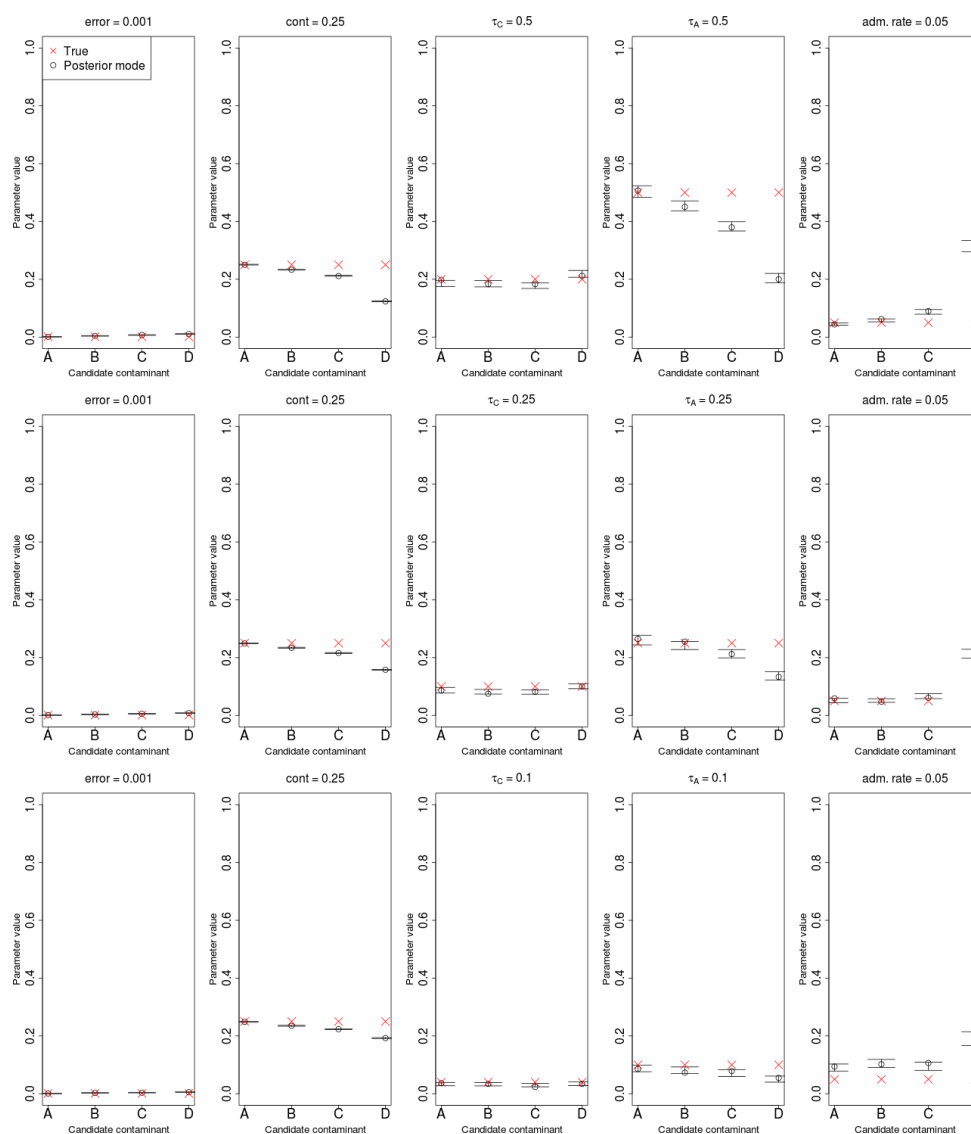

**Figure S27.** Parameters estimates under the three-population model using different putative contaminants, when the true contaminant is panel A. Each row of panels represents a different set of drift parameters, keeping the contamination rate fixed at 25% and the error rate at 0.1%. In this case, the admixture rate from the ancient population to the ancestor of A and B was kept at 5%. The unadmixed anchor panel used was panel D and the admixed anchor panel was panel B (see Figure S15).

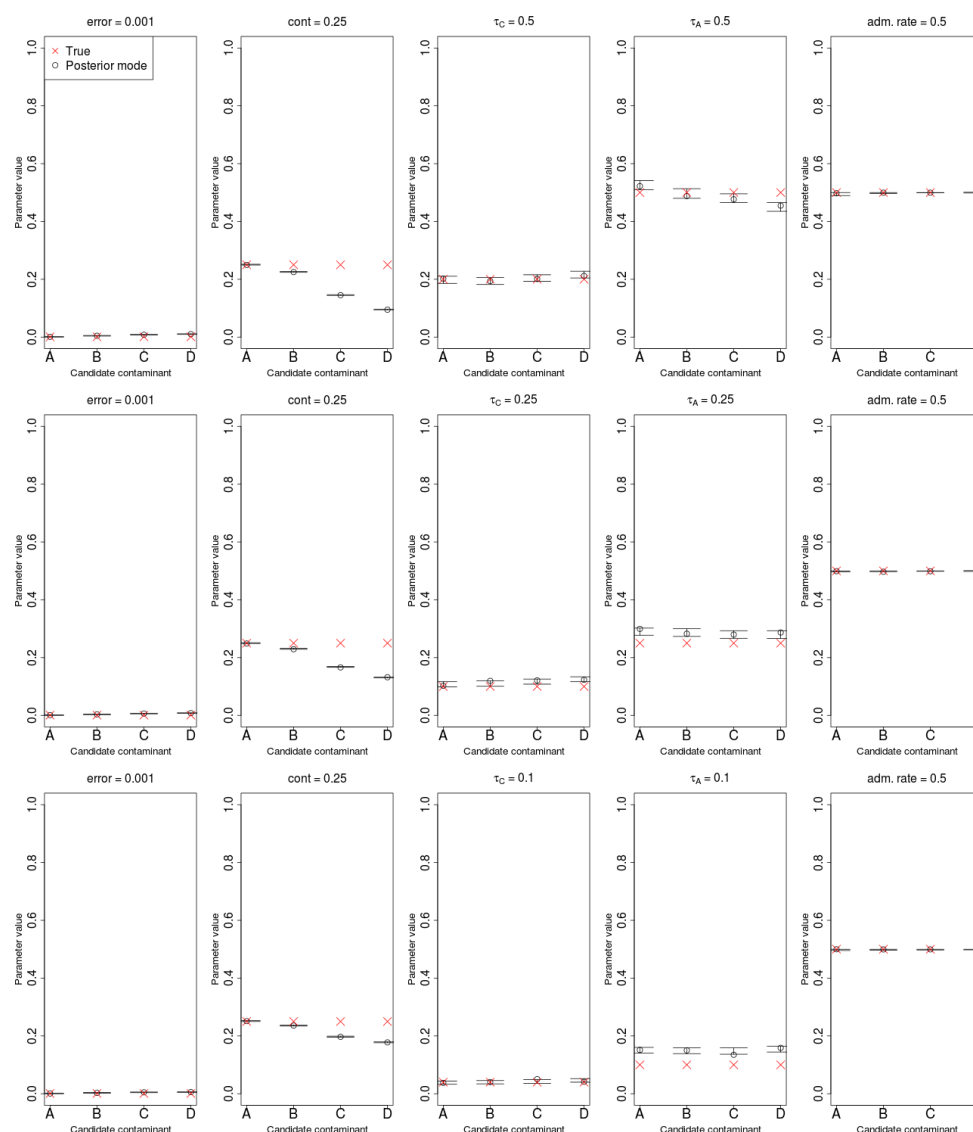

**Figure S28.** Parameters estimates under the three-population model using different putative contaminants, when the true contaminant is panel A. Each row of panels represents a different set of drift parameters, keeping the contamination rate fixed at 25% and the error rate at 0.1%. In this case, the admixture rate from the ancient population to the ancestor of A and B was kept at 50%. The unadmixed anchor panel used was panel D and the admixed anchor panel was panel B (see Figure S15).

## 726 Appendix A. Genotype probabilities conditional on a demography

727 Below we derive formulas 7, 8 and 9. Recall that we are interested in  
 728 calculating the conditional probabilities  $P[i|\Omega, \mathbf{O}] = \mathbf{P}[\mathbf{i}|\mathbf{y}, \tau_C, \tau_A]$  for all  
 729 three possibilities for the genotype in the ancient individual:  $i = 0, 1$  or  $2$ .  
 730 These can be obtained from the definition of conditional probability. Let  
 731  $f_y^{DD}$  be the joint probability that a site has frequency  $y$  ( $0 < y < 1$ ) in the  
 732 contaminant panel and is homozygous for the derived allele in the ancient  
 733 individual. Let  $f_y^{DA}$  be the joint probability that a site has frequency  $y$  in the  
 734 contaminant panel and is heterozygous in the ancient individual. Finally, let  
 735  $f_y^{AA}$  be the joint probability that a site has frequency  $y$  in the anchor panel  
 736 and is homozygous for the ancient allele in the ancient individual. Then:

$$P[i = 0 | y, \tau_C, \tau_A] = \frac{f_y^{AA}}{f_y} = \frac{f_y^{AA}}{f_y^{AA} + f_y^{DA} + f_y^{DD}} \quad (\text{A.1})$$

$$P[i = 1 | y, \tau_C, \tau_A] = \frac{f_y^{DA}}{f_y} = \frac{f_y^{DA}}{f_y^{AA} + f_y^{DA} + f_y^{DD}} \quad (\text{A.2})$$

$$P[i = 2 | y, \tau_C, \tau_A] = \frac{f_y^{DD}}{f_y} = \frac{f_y^{DD}}{f_y^{AA} + f_y^{DA} + f_y^{DD}} \quad (\text{A.3})$$

737 In the above expressions, the functions  $f$  depend on  $\tau_C$  and  $\tau_A$ , but we  
 738 omit this conditioning for ease of notation. As can be seen, all we need  
 739 to find is the joint probabilities  $f_y^{AA}$ ,  $f_y^{DA}$  and  $f_y^{DD}$ . Here is where diffusion  
 740 theory comes into play. Let  $\phi(y, \tau|x, 0)$  be the Kimura solution to the neutral  
 741 forward diffusion equation in the absence of mutation [42], given a frequency  
 742  $x$  at time 0 and an elapsed drift time  $\tau$ :

$$\phi(y, \tau|x, 0) = 4x(1-x) \sum_{h=1}^{\infty} \frac{2j+1}{j(j+1)} C_{h-1}^{3/2}(1-2x) C_{h-1}^{3/2}(1-2y) e^{-j(j+1)\tau/2} \quad (\text{A.4})$$

743 Here,  $x$  is the unknown population frequency of the derived allele in the  
 744 ancestral population and  $C_{h-1}^{(3/2)}(\bullet)$  is the Gegenbauer polynomial of order  $h-1$   
 745 [43].

746 Assuming the ancestral population follows an equilibrium frequency dis-  
 747 tribution  $g(x) = \theta/x$ , we can write  $f_y^{DD}$  as follows:

$$f_y^{DD} = \int_0^1 \phi(y, \tau_C | x, 0) g(x) \left( \int_0^1 z^2 \phi(z, \tau_A | x, 0) dz \right) dx \quad (\text{A.5})$$

748 where  $z$  is the unknown population frequency of a derived allele in the  
749 population to which the ancient individual belongs.

750 The expression in parentheses is the second moment of the transition  
751 density and its solution is known [44]:

$$\int_0^1 z^2 \phi(z, \tau_A | x, 0) dz = x - x(1 - x)e^{-\tau_A} \quad (\text{A.6})$$

752 This results in:

$$f_y^{DD} = \theta \int_0^1 \phi(y, \tau_C | x, 0) [1 - (1 - x)e^{-\tau_A}] dx \quad (\text{A.7})$$

$$f_y^{DD} = \theta \left[ \int_0^1 \phi(y, \tau_C | x, 0) dx - e^{-\tau_A} \int_0^1 \phi(y, \tau_C | x, 0) dx + e^{-\tau_A} \int_0^1 x \phi(y, \tau_C | x, 0) dx \right] \quad (\text{A.8})$$

753 The integral of the first two terms of the sum was solved in Chen et al.  
754 [18]:

$$\int_0^1 \phi(y, \tau_C | x, 0) dx = e^{-\tau_C} \quad (\text{A.9})$$

755 The third term of the sum can be solved by noting that, though the  
756 integrand is an infinite sum (i.e. formula A.4 multiplied by  $x$ ), only the  
757 integrals of the first two terms of that infinite sum are not equal to 0. This  
758 can be seen by integrating the parts of the terms of that infinite sum that  
759 depend on  $x$ :

$$\int_0^1 x^2 (1 - x) C_{h-1}^{(3/2)} (1 - 2x) dx = \begin{cases} 1/12 & h = 1 \\ -1/20 & h = 2 \\ 0 & h \geq 3 \end{cases}$$

760 Therefore, after integrating the first two terms of the infinite sum, we  
761 obtain:

$$\int_0^1 x \phi(y, \tau_C | x, 0) dx = \frac{1}{2} e^{-\tau_C} + \left( y - \frac{1}{2} \right) e^{-3\tau_C} \quad (\text{A.10})$$



762 So we finally arrive at:

$$f_y^{DD} = \theta \left[ e^{-\tau_C} - \frac{1}{2} e^{-\tau_A - \tau_C} + \left( y - \frac{1}{2} \right) e^{-\tau_A - 3\tau_C} \right] \quad (\text{A.11})$$

763 We can obtain  $f_y^{DA}$  in a similar fashion:

$$f_y^{DA} = \int_0^1 \phi(y, \tau_C | x, 0) g(x) \left( \int_0^1 2z(1-z) \phi(z, \tau_A | x, 0) dz \right) dx \quad (\text{A.12})$$

764 Solving the term in the parentheses:

$$\int_0^1 2z(1-z) \phi(z, \tau_A | x, 0) dz = 2 \left( \int_0^1 z \phi(z, \tau_A | x, 0) dz - \int_0^1 z^2 \phi(z, \tau_A | x, 0) dz \right) \quad (\text{A.13})$$

765 The first term of the difference is the first moment of the transition den-  
766 sity, which is equal to  $x$  [44], while the second term is the second moment  
767 (formula A.6). Therefore:

$$f_y^{DA} = 2\theta e^{-\tau_A} \left[ \int_0^1 \phi(y, \tau_C | x, 0) (1-x) dx \right] \quad (\text{A.14})$$

$$f_y^{DA} = 2\theta e^{-\tau_A} \left[ \int_0^1 \phi(y, \tau_C | x, 0) dx - \int_0^1 x \phi(y, \tau_C | x, 0) dx \right] \quad (\text{A.15})$$

768 And after using formulas A.9 and A.10, we obtain:

$$f_y^{DA} = \theta \left[ e^{-\tau_A - \tau_C} + (1-2y) e^{-\tau_A - 3\tau_C} \right] \quad (\text{A.16})$$

769 To obtain  $f_y^{AA}$ , we know that, assuming the anchor population to be at  
770 equilibrium:

$$f_y = g(y) \quad (\text{A.17})$$

771 And therefore:

$$f_y^{AA} + f_y^{DA} + f_y^{DD} = \frac{\theta}{y} \quad (\text{A.18})$$

772 So we finally obtain:

$$f_y^{AA} = \theta \left[ \frac{1}{y} - e^{-\tau_C} - \frac{1}{2} e^{-\tau_A - \tau_C} + \left( y - \frac{1}{2} \right) e^{-\tau_A - 3\tau_C} \right] \quad (\text{A.19})$$

773 We now have all the elements necessary to obtain the conditional probab-  
 774 ities from formulas A.1, A.2 and A.3, which immediately lead us to formulas  
 775 7, 8 and 9.

## 776 Appendix B. Probabilistic inference using BAM files

777 Here, we briefly explain the way we infer fragment-specific error param-  
 778 eters in the optional BAM mode of DICE. Let  $\mathbb{R}$  be the set of all fragments in  
 779 the BAM file, and  $R_j \in \mathbb{R}$  be a particular aligned fragment of length  $l$ . For  
 780 fragment  $R_j$ , let  $\{b_{j,1}, \dots, b_{j,l}\}$  be the individuals nucleotides in the fragment.  
 781 At each position of the fragment, there is a specific probability  $\kappa_{j,i}$  that the  
 782 base is erroneous. This probability is provided by the basecaller. Below, we  
 783 will compute the likelihood of observing a base  $b_{j,i} \in R_j$  under a bi-allelic  
 784 model, given an error rate  $\kappa_{j,i}$ . Below, we focus on an individual fragment  
 785  $R_j$  and an individual position  $i$  on that fragment, so for simplicity, we drop  
 786 the subscripts  $i$  and  $j$  and we let  $b_{j,i} = b$  and  $\kappa_{j,i} = \kappa$ .

787 Let  $v$  be the base that was originally sampled at a given site, before  
 788 deamination or mismapping. This base could be ancestral or derived. Let  
 789  $P_{\text{dam}}[v \rightarrow b]$  be the probability of substitution from  $v$  to  $b$  due to post-  
 790 mortem chemical damage. The probabilities of different types of damage  
 791 (e.g. C→T or G→A) occurring at different positions of a fragment can be  
 792 computed following Ginolhac et al. [45] and Jónsson et al. [46], producing  
 793 a matrix that can be provided to DICE as input. We offer the possibility  
 794 of specifying different post-mortem damage matrices for the endogenous and  
 795 the contaminant fragments.

796 Let  $E$  denote the event that a sequencing error has occurred, let  $D$  the  
 797 event that chemical damage has occurred, let  $M$  be the event that  $R_j$  was  
 798 correctly mapped and let  $\neg$  denote the complement of an event (i.e. event  
 799 has not occurred). We define the probability of observing sequenced base  
 800  $b$  given that no sequencing error has occurred at a position on a correctly  
 801 mapped fragment that was originally  $v$ , by summing over two possibilities,  
 802 either chemical damage occurred or it did not:

$$P[b|v, M, \neg E] = \mathbb{1}(v = b) \cdot P[\neg D] + (1 - \mathbb{1}(v = b)) \cdot P[D] \quad (\text{B.1})$$

803 Here,  $\mathbb{1}(v = b)$  is an indicator function that is equal to 1 if  $v$  is equal to  $b$ ,  
 804 and 0 otherwise. The probabilities  $P[D]$  and  $P[\neg D]$  are respectively equal  
 805 to  $P_{dam}[v \rightarrow b]$  and  $1 - P_{dam}[v \rightarrow b]$ .

806 Subsequently, we compute  $P[b|v, M]$ , the probability of observing  $b$  given  
 807  $v$  under the assumption that  $R_j$  was mapped at the correct genomic location.  
 808 We have:

$$P[b|v, M] = (1 - \kappa) \cdot P[b|v, M, \neg E] + \kappa \cdot \frac{1}{2} \quad (\text{B.2})$$

809 This is because if a sequencing error has occurred, the probability of observing  
 810  $b$  is independent of  $v$ , and therefore  $P[b|v, M, E] = \frac{1}{2}$ . Finally, let  $P[M]$  be  
 811 the probability that the fragment  $R_j$  is mapped at the correct location as  
 812 given by the mapping quality. The probability of seeing  $b$  given that  $v$  was  
 813 the base that was sampled before deamination is then:

$$P[b|v] = P[M] \cdot P[b|v, M] + P[\neg M] \cdot \frac{1}{2} \quad (\text{B.3})$$

814 The probability of observing  $b$  given that the fragment was mismapped is  
 815 independent of  $v$ , hence  $P[b|v, \neg M] = \frac{1}{2}$ . If either the base quality or mapping  
 816 quality indicate a probability of error of 100%,  $P[b|v]$  will be equal to  $\frac{1}{2}$ . These  
 817 probabilities are used instead of the genome-wide error term  $\epsilon$  in equations  
 818 4, 5 and 6. For instance, equation 4 for a specific base  $b$  in fragment  $R_j$   
 819 becomes:

$$\begin{aligned} q_2 = & r_C(w \cdot P[b = der|v = der, \text{contaminant}] + \\ & (1 - w) \cdot P[b = der|v = anc, \text{contaminant}]) + \\ & (1 - r_C) \cdot P[b = der|v = der, \text{ancient}] \end{aligned} \quad (\text{B.4})$$

820 Here, *der* is the derived base and *anc* is the ancestral base. In case different  
 821 post-mortem damage matrices are provided by the user for the ancient and  
 822 the contaminant fragments, the events *contaminant* and *ancient* serve to  
 823 denote which damage probabilities (i.e.  $P_{dam}$ ) should be used in each case.
